# Supplementary material for: A novel in situ methodology for U–Pb, (U–Th)/He, and fission track triple dating
Source: Royal Society of Chemistry journal article supplement (doi:10.1039/d4ja00257a), 2024-01-01
Supplement: d4ja00257a1.pdf [file d4ja00257a1.pdf]

Fig. S1 The ablation pits captured by CLM. From the left to the right, the ablation time is from 10s to 80s.

Fig. S2 All ages for the five samples. The uncertainty is 2 standard error.
