# Supplementary material for: A novel in situ methodology for U–Pb, (U–Th)/He, and fission track triple dating
Source: Royal Society of Chemistry journal article supplement (doi:10.1039/d4ja00257a), 2024-01-01
Supplement: d4ja00257a4.xlsx [file d4ja00257a4.xlsx]

## Sheet: Sheet1
File Names	Sample Names	207Pb/206Pb	2s	206Pb/238U	2s	207Pb/235U	2s	208Pb/232Th	2s	208Pb/206Pb	2s	232Th/206Pb	2s	208Pb/204Pb	2s	Age(Ma)	206Pb_238U	2s	207Pb_235U	2s	208Pb_232Th	2s	207Pb_206Pb	2s	Terra-Wasserburg Plot:	238U/206Pb	2s error	207Pb/206Pb	2s error	Plotting purposes:	207Pb/235U	2s error	206Pb/238U	2s error	rho		208Pb/232Th	2s error	208Pb/206Pb	2s error	Trace element	U (ppm)	Th (ppm)	Pb (ppm)
MRC_Normal_Model
JA004.csv	MRC001	0.0867568	0.0094404	0.0241585	0.000614375	0.288855	0.0283594	0.00785857	0.000130032	2.56595	0.0861242	330.852	10.9418	#NUM!	#NUM!	------------	153.885	6.05205	257.658	26.4511	158.218	5.42065	1355.01	198.943	------------	41.3932	1.62794	0.0867568	0.0094404	------------	0.288855	0.0296538	0.0241585	0.00095012	0.0179791	------------	0.00785857	0.000130032	2.56595	0.0861242		24.3888	208.707	2.0984
JA013.csv	MRC002	0.0820907	0.0100176	0.0236893	0.000651718	0.268011	0.0289901	0.00762214	0.000138919	2.56094	0.0867559	333.571	11.4631	#NUM!	#NUM!	------------	150.931	6.14355	241.102	27.0639	153.476	5.38738	1247.13	223.462	------------	42.2131	1.71826	0.0820907	0.0100176	------------	0.268011	0.0300845	0.0236893	0.000964263	0.0803826	------------	0.00762214	0.000138919	2.56094	0.0867559		23.8901	204.769	1.95578
JA023.csv	MRC003	0.0812601	0.00864424	0.0241892	0.000548486	0.270897	0.0250882	0.00767567	0.000148564	2.51609	0.0908324	327.839	9.3673	#NUM!	#NUM!	------------	154.077	5.79411	243.411	23.6959	154.55	5.51772	1227.13	196.815	------------	41.3408	1.55463	0.0812601	0.00864424	------------	0.270897	0.0263716	0.0241892	0.000909638	0.0717226	------------	0.00767567	0.000148564	2.51609	0.0908324		23.8659	204.889	1.94819
JA032.csv	MRC004	0.0874981	0.00922864	0.0238102	0.000604205	0.287122	0.026546	0.00771052	0.000138272	2.58102	0.0931798	331.483	11.3206	#NUM!	#NUM!	------------	151.691	5.96041	256.292	24.9117	155.249	5.42615	1371.51	192.968	------------	41.9989	1.65026	0.0874981	0.00922864	------------	0.287122	0.0279085	0.0238102	0.000935572	0.0304428	------------	0.00771052	0.000138272	2.58102	0.0931798		23.6509	203.035	1.93569
JA042.csv	MRC005	0.0881034	0.010552	0.0239081	0.000623021	0.290297	0.0301324	0.00753675	0.00012852	2.61197	0.0869159	336.707	12.455	#NUM!	#NUM!	------------	152.308	6.05234	258.793	27.9618	151.763	5.23701	1384.86	217.45	------------	41.8269	1.6621	0.0881034	0.010552	------------	0.290297	0.0313657	0.0239081	0.000950048	0.138713	------------	0.00753675	0.00012852	2.61197	0.0869159		23.3208	203.493	1.90727
JA051.csv	MRC006	0.0848985	0.0100479	0.0238702	0.000584258	0.279295	0.0282248	0.00768016	0.00011702	2.66169	0.0870188	339.987	11.271	#NUM!	#NUM!	------------	152.07	5.88785	250.098	26.3644	154.64	5.20326	1312.91	215.951	------------	41.8932	1.62203	0.0848985	0.0100479	------------	0.279295	0.0294422	0.0238702	0.000924211	0.183184	------------	0.00768016	0.00011702	2.66169	0.0870188		23.4108	204.616	1.90815
JA061.csv	MRC007	0.0814799	0.0101584	0.0252435	0.000647842	0.283469	0.0299089	0.00782242	0.000121936	2.60199	0.0914751	328.201	12.2579	#NUM!	#NUM!	------------	160.71	6.34475	253.406	27.7966	157.493	5.32454	1232.45	228.298	------------	39.6141	1.56394	0.0814799	0.0101584	------------	0.283469	0.0310944	0.0252435	0.0009966	0.236969	------------	0.00782242	0.000121936	2.60199	0.0914751		23.1391	204.269	1.92973
JA070.csv	MRC008	0.0867033	0.0104462	0.0244787	0.00054839	0.292502	0.0291403	0.00777221	0.000123713	2.67862	0.0834133	345.323	11.7903	#NUM!	#NUM!	------------	155.899	5.83714	260.527	27.1061	156.486	5.31446	1353.82	219.018	------------	40.8519	1.52957	0.0867033	0.0104462	------------	0.292502	0.0304329	0.0244787	0.000916524	0.306628	------------	0.00777221	0.000123713	2.67862	0.0834133		23.1376	206.293	1.89372
JA080.csv	MRC009	0.0981776	0.0095745	0.0253784	0.000659154	0.343386	0.0281584	0.00757226	0.000129481	2.59244	0.100511	340.171	14.4451	#NUM!	#NUM!	------------	161.558	6.41082	299.734	26.172	152.476	5.26514	1593.01	178.767	------------	39.4037	1.56359	0.0981776	0.0095745	------------	0.343386	0.0299836	0.0253784	0.00100704	0.0593986	------------	0.00757226	0.000129481	2.59244	0.100511		23.1858	208.194	1.89343
JA089.csv	MRC010	0.0804852	0.00957136	0.0247246	0.00058069	0.274253	0.0269895	0.00777979	0.000130595	2.68939	0.093794	339.05	11.8555	#NUM!	#NUM!	------------	157.447	5.99871	246.088	25.3181	156.638	5.38477	1208.25	218.961	------------	40.4455	1.54097	0.0804852	0.00957136	------------	0.274253	0.0282157	0.0247246	0.000942007	0.281372	------------	0.00777979	0.000130595	2.68939	0.093794		23.1228	208.974	1.90277
JA099.csv	MRC011	0.0838343	0.00979822	0.0261898	0.000637544	0.302594	0.0293401	0.00762958	0.000121791	2.53545	0.0832459	324.182	10.9746	#NUM!	#NUM!	------------	166.657	6.43865	268.424	27.2442	153.625	5.2206	1288.3	213.827	------------	38.1828	1.47516	0.0838343	0.00979822	------------	0.302594	0.0307124	0.0261898	0.00101182	0.250656	------------	0.00762958	0.000121791	2.53545	0.0832459		23.3861	210.971	1.93256
JA108.csv	MRC012	0.0805669	0.00941922	0.024015	0.000668419	0.266652	0.0259142	0.0077169	0.000129466	2.72017	0.097399	343.74	13.5379	#NUM!	#NUM!	------------	152.981	6.26045	240.013	24.4114	155.377	5.34069	1210.25	215.45	------------	41.6407	1.70407	0.0805669	0.00941922	------------	0.266652	0.0271208	0.024015	0.000982767	0.210104	------------	0.0077169	0.000129466	2.72017	0.097399		23.4526	209.009	1.87768
JA118.csv	MRC013	0.0933846	0.00960864	0.0247333	0.000626042	0.318319	0.0274021	0.00773096	0.000126175	2.65734	0.0952463	346.294	13.6238	#NUM!	#NUM!	------------	157.501	6.18216	280.609	25.5807	155.659	5.31608	1497.03	187.794	------------	40.4313	1.58699	0.0933846	0.00960864	------------	0.318319	0.0290184	0.0247333	0.000970819	0.116811	------------	0.00773096	0.000126175	2.65734	0.0952463		23.5119	212.585	1.92613
JA127.csv	MRC014	0.0933484	0.0107486	0.0241648	0.000574988	0.310883	0.0295324	0.00769072	0.000121026	2.70626	0.0949911	348.77	12.6489	#NUM!	#NUM!	------------	153.924	5.89385	274.865	27.382	154.852	5.2459	1496.29	209.018	------------	41.3825	1.58456	0.0933484	0.0107486	------------	0.310883	0.0309701	0.0241648	0.000925287	0.257973	------------	0.00769072	0.000121026	2.70626	0.0949911		23.7588	214.453	1.9164
JA137.csv	MRC015	0.085583	0.00976316	0.0242692	0.000622863	0.286253	0.0266393	0.00754991	0.00013045	2.70423	0.107707	352.741	13.0495	#NUM!	#NUM!	------------	154.581	6.10288	255.605	24.9927	152.027	5.26318	1328.55	208.373	------------	41.2045	1.62676	0.085583	0.00976316	------------	0.286253	0.0279893	0.0242692	0.000958151	0.258346	------------	0.00754991	0.00013045	2.70423	0.107707		23.5706	211.415	1.86915
JA146.csv	MRC016	0.0953141	0.0103304	0.0251437	0.000599686	0.330288	0.0290864	0.00784274	0.00014426	2.65858	0.108437	337.164	13.1979	#NUM!	#NUM!	------------	160.083	6.13523	289.786	26.9598	157.901	5.55654	1536.27	197.419	------------	39.7714	1.52425	0.0953141	0.0103304	------------	0.330288	0.0307279	0.0251437	0.000963644	0.241592	------------	0.00784274	0.00014426	2.65858	0.108437		23.2232	209.953	1.90549
JA156.csv	MRC017	0.0789506	0.00868195	0.024473	0.000698564	0.266286	0.0241203	0.00765158	0.000116668	2.66285	0.10204	344.639	14.7241	#NUM!	#NUM!	------------	155.863	6.45428	239.72	22.8739	154.067	5.18472	1170.17	204.312	------------	40.8614	1.69207	0.0789506	0.00868195	------------	0.266286	0.0254088	0.024473	0.00101342	0.173759	------------	0.00765158	0.000116668	2.66285	0.10204		22.8339	205.07	1.82045
JA165.csv	MRC018	0.0837251	0.0100599	0.0258807	0.000613132	0.298633	0.0283916	0.00787468	0.000125649	2.69605	0.0900562	339.135	13.2923	#NUM!	#NUM!	------------	164.715	6.29646	265.332	26.4517	158.541	5.38713	1285.75	219.499	------------	38.6388	1.47702	0.0837251	0.0100599	------------	0.298633	0.0297715	0.0258807	0.000989324	0.383441	------------	0.00787468	0.000125649	2.69605	0.0900562		22.5117	204.588	1.85993
JA175.csv	MRC019	0.0957936	0.012308	0.0247538	0.000652396	0.326801	0.0338309	0.00795026	0.000119505	2.80712	0.104716	351.065	14.5485	#NUM!	#NUM!	------------	157.63	6.29457	287.121	30.9461	160.057	5.37074	1545.9	232.129	------------	40.3979	1.61319	0.0957936	0.012308	------------	0.326801	0.0352228	0.0247538	0.000988481	0.370498	------------	0.00795026	0.000119505	2.80712	0.104716		22.1725	204.119	1.83151
JA184.csv	MRC020	0.0836122	0.00957568	0.0246655	0.000671017	0.284227	0.0266883	0.00771731	0.000123403	2.75048	0.0973336	350.853	15.1081	#NUM!	#NUM!	------------	157.075	6.36123	254.005	25.0382	155.385	5.28239	1283.11	209.872	------------	40.5425	1.64189	0.0836122	0.00957568	------------	0.284227	0.0280173	0.0246655	0.000998905	0.23285	------------	0.00771731	0.000123403	2.75048	0.0973336		21.7107	199.614	1.77252
JA194.csv	MRC021	0.0888128	0.0101576	0.0251823	0.000713347	0.308232	0.0287934	0.0078123	0.000118525	2.74521	0.111367	346.291	14.8635	#NUM!	#NUM!	------------	160.326	6.61512	272.81	26.7664	157.29	5.2878	1400.37	208.052	------------	39.7104	1.63847	0.0888128	0.0101576	------------	0.308232	0.0302418	0.0251823	0.00103904	0.228731	------------	0.0078123	0.000118525	2.74521	0.111367		21.5351	199.411	1.78155
JA203.csv	MRC022	0.0873053	0.0107569	0.0238152	0.000530798	0.286551	0.0279748	0.00773037	0.000130759	2.77894	0.10066	351.361	13.8722	#NUM!	#NUM!	------------	151.723	5.6704	255.841	26.1294	155.647	5.36049	1367.24	223.519	------------	41.9899	1.5693	0.0873053	0.0107569	------------	0.286551	0.0292659	0.0238152	0.000890053	0.365933	------------	0.00773037	0.000130759	2.77894	0.10066		23.2767	204.141	1.81462
JA213.csv	MRC023	0.0757621	0.0103971	0.0247729	0.000459535	0.258663	0.027889	0.00793184	0.000147932	2.62642	0.0814764	324.112	10.2855	#NUM!	#NUM!	------------	157.75	5.56413	233.589	26.1422	159.688	5.64093	1087.97	253.626	------------	40.3667	1.42381	0.0757621	0.0103971	------------	0.258663	0.0289484	0.0247729	0.000873784	0.315165	------------	0.00793184	0.000147932	2.62642	0.0814764		23.6796	203.19	1.85117
JA222.csv	MRC024	0.083735	0.0101796	0.0247771	0.00058431	0.285932	0.0278108	0.00777265	0.000125006	2.52667	0.0954406	322.124	11.4723	#NUM!	#NUM!	------------	157.777	6.02067	255.353	25.9911	156.495	5.32694	1285.98	221.918	------------	40.3599	1.54011	0.083735	0.0101796	------------	0.285932	0.0291037	0.0247771	0.00094548	0.374901	------------	0.00777265	0.000125006	2.52667	0.0954406		24.309	206.691	1.86761
JA232.csv	MRC025	0.0967074	0.00997565	0.0242713	0.00055778	0.323488	0.0269002	0.00780735	0.000136238	2.59705	0.0965867	329.448	12.9081	#NUM!	#NUM!	------------	154.594	5.8422	284.582	25.1578	157.191	5.45546	1564.09	188.445	------------	41.201	1.55701	0.0967074	0.00997565	------------	0.323488	0.0285972	0.0242713	0.000917226	0.224099	------------	0.00780735	0.000136238	2.59705	0.0965867		24.3147	206.552	1.86026
JA241.csv	MRC026	0.0956466	0.0108245	0.0241684	0.000569146	0.318584	0.0289045	0.00776029	0.000118171	2.59022	0.0947439	331.834	13.8107	#NUM!	#NUM!	------------	153.947	5.87134	280.813	26.8342	156.247	5.2567	1542.95	205.755	------------	41.3763	1.57804	0.0956466	0.0108245	------------	0.318584	0.0304436	0.0241684	0.000921754	0.318537	------------	0.00776029	0.000118171	2.59022	0.0947439		24.937	213.985	1.91948
JA251.csv	MRC027	0.083661	0.00935611	0.0254365	0.00055538	0.293283	0.0258012	0.00771259	0.000129947	2.4892	0.0818602	316.823	11.0561	#NUM!	#NUM!	------------	161.924	6.00805	261.14	24.2725	155.291	5.34317	1284.25	205.208	------------	39.3135	1.4587	0.083661	0.00935611	------------	0.293283	0.0272601	0.0254365	0.000943802	0.375594	------------	0.00771259	0.000129947	2.4892	0.0818602		24.9192	213.867	1.91608
JA260.csv	MRC028	0.0874704	0.0103908	0.0239506	0.000639755	0.288724	0.0274133	0.00776289	0.000120436	2.80238	0.110565	357.435	15.9753	#NUM!	#NUM!	------------	152.575	6.12871	257.554	25.6456	156.299	5.27889	1370.9	215.926	------------	41.7527	1.67714	0.0874704	0.0103908	------------	0.288724	0.0287492	0.0239506	0.000962056	0.335442	------------	0.00776289	0.000120436	2.80238	0.110565		23.754	213.625	1.87599
JA270.csv	MRC029	0.0930716	0.0110756	0.0250153	0.000681325	0.32087	0.0303277	0.00768092	0.000120693	2.84301	0.12218	364.887	16.7567	#NUM!	#NUM!	------------	159.275	6.45372	282.571	28.0209	154.655	5.23756	1490.58	215.649	------------	39.9756	1.61978	0.0930716	0.0110756	------------	0.32087	0.0318187	0.0250153	0.0010136	0.346675	------------	0.00768092	0.000120693	2.84301	0.12218		19.0431	179.879	1.5541
JA279.csv	MRC030	0.0957227	0.00958299	0.0241632	0.000588075	0.318768	0.0257728	0.00783243	0.000115081	2.66245	0.0997777	334.628	12.9641	#NUM!	#NUM!	------------	153.914	5.94577	280.955	24.2288	157.694	5.26774	1544.48	183.033	------------	41.3853	1.59874	0.0957227	0.00958299	------------	0.318768	0.0274898	0.0241632	0.000933437	0.179081	------------	0.00783243	0.000115081	2.66245	0.0997777		24.9795	213.884	1.92519
JA286.csv	MRC031	0.0839342	0.00942039	0.0249152	0.000547499	0.288211	0.0254487	0.00787746	0.000113133	2.5818	0.090979	324.866	12.5645	#NUM!	#NUM!	------------	158.646	5.89956	257.15	23.9808	158.597	5.27501	1290.62	205.792	------------	40.1361	1.49254	0.0839342	0.00942039	------------	0.288211	0.0268774	0.0249152	0.000926524	0.377343	------------	0.00787746	0.000113133	2.5818	0.090979		24.7791	211.664	1.90627
MRC_U-Pb_second_ref_Deep_Model
JA004.csv	MRC_U-Pb_second_ref001	0.0854081	0.0134898	0.0264992	0.000928888	0.311916	0.0411454	0.0082537	0.000179676	2.79039	0.146747	338.369	18.6737	#NUM!	#NUM!	-------------	168.601	7.77895	275.665	37.292	166.141	6.1582	1324.57	282.447	-------------	37.737	1.74112	0.0854081	0.0134898	-------------	0.311916	0.042196	0.0264992	0.00122263	0.341058	-------------	0.0082537	0.000305933	2.79039	0.146747		21.6457	200.184	1.93416
JA019.csv	MRC_U-Pb_second_ref002	0.0971071	0.0137357	0.0257823	0.000882658	0.345047	0.0410335	0.00820831	0.000195108	2.80607	0.136614	336.971	17.354	#NUM!	#NUM!	-------------	164.097	7.46963	300.989	36.9155	165.231	6.32425	1572	254.475	-------------	38.7863	1.76554	0.0971071	0.0137357	-------------	0.345047	0.0423191	0.0257823	0.0011736	0.268095	-------------	0.00820831	0.000314175	2.80607	0.136614		22.2213	201.472	1.94979
JA034.csv	MRC_U-Pb_second_ref003	0.0975882	0.0166924	0.0255261	0.000812253	0.343311	0.0485265	0.00796507	0.000166671	2.68674	0.121463	334.743	15.7318	#NUM!	#NUM!	-------------	162.487	7.10598	299.678	43.3025	160.354	5.86525	1581.47	304.31	-------------	39.1756	1.71325	0.0975882	0.0166924	-------------	0.343311	0.0496074	0.0255261	0.00111632	0.302654	-------------	0.00796507	0.000291337	2.68674	0.121463		22.4182	201.52	1.91058
JA049.csv	MRC_U-Pb_second_ref004	0.0844247	0.0129121	0.0257522	0.000785959	0.299633	0.0380135	0.0079986	0.00019501	2.70693	0.137389	334.708	16.0934	#NUM!	#NUM!	-------------	163.908	7.01455	266.113	34.6921	161.026	6.2249	1302	274.528	-------------	38.8317	1.66183	0.0844247	0.0129121	-------------	0.299633	0.0390619	0.0257522	0.00110208	0.328274	-------------	0.0079986	0.000309207	2.70693	0.137389		22.5636	201.363	1.90514
JA064.csv	MRC_U-Pb_second_ref005	0.070763	0.0137405	0.025195	0.000896207	0.245712	0.0393965	0.00757297	0.000176054	2.56424	0.138853	337.332	18.1733	#NUM!	#NUM!	-------------	160.405	7.46406	223.087	36.3896	152.49	5.78749	949.674	354.146	-------------	39.6905	1.8469	0.070763	0.0137405	-------------	0.245712	0.0400802	0.025195	0.00117239	0.285269	-------------	0.00757297	0.000287419	2.56424	0.138853		23.1244	204.396	1.85838
JA079.csv	MRC_U-Pb_second_ref006	0.0872569	0.0122988	0.0244369	0.000931035	0.293868	0.0351787	0.00772931	0.000184213	2.67288	0.132731	342.217	17.527	#NUM!	#NUM!	-------------	155.636	7.54729	261.599	32.2843	155.626	5.96276	1366.16	253.556	-------------	40.9217	1.98442	0.0872569	0.0122988	-------------	0.293868	0.0362666	0.0244369	0.00118502	0.199239	-------------	0.00772931	0.000296146	2.67288	0.132731		23.3602	206.087	1.90133
JA094.csv	MRC_U-Pb_second_ref007	0.101227	0.0150383	0.023871	0.000919735	0.333022	0.0418492	0.00788078	0.000151245	2.77934	0.153477	353.091	21.4761	#NUM!	#NUM!	-------------	152.074	7.42602	291.871	37.7086	158.664	5.65057	1651.64	267.642	-------------	41.8919	2.04565	0.101227	0.0150383	-------------	0.333022	0.0430253	0.023871	0.00116566	0.245202	-------------	0.00788078	0.000280662	2.77934	0.153477		23.5333	208.54	1.91776
JA109.csv	MRC_U-Pb_second_ref008	0.105507	0.0167278	0.0245659	0.000721436	0.357208	0.0467899	0.00770509	0.000184836	2.72807	0.11772	354.887	17.1038	#NUM!	#NUM!	-------------	156.448	6.56793	310.128	41.6748	155.14	5.95921	1731.19	285.231	-------------	40.7068	1.70893	0.105507	0.0167278	-------------	0.357208	0.0480014	0.0245659	0.00103131	0.31241	-------------	0.00770509	0.000295966	2.72807	0.11772		23.1119	207.393	1.89469
JA124.csv	MRC_U-Pb_second_ref009	0.0829048	0.0140627	0.0250048	0.000719667	0.285699	0.0398757	0.00766745	0.000166301	2.65716	0.131768	339.079	14.9953	#NUM!	#NUM!	-------------	159.209	6.61887	255.168	36.4279	154.385	5.71522	1266.48	302.76	-------------	39.9924	1.66262	0.0829048	0.0140627	-------------	0.285699	0.0407864	0.0250048	0.00103954	0.291212	-------------	0.00766745	0.000283843	2.65716	0.131768		23.1019	205.312	1.85135
JA139.csv	MRC_U-Pb_second_ref010	0.11267	0.0161275	0.0257779	0.00085138	0.400276	0.0479882	0.0078409	0.000173421	2.66997	0.131284	330.464	16.9702	#NUM!	#NUM!	-------------	164.069	7.32053	341.848	42.2471	157.864	5.88386	1858.19	256.878	-------------	38.793	1.73089	0.11267	0.0161275	-------------	0.400276	0.0494678	0.0257779	0.00115017	0.301512	-------------	0.0078409	0.000292244	2.66997	0.131284		23.2019	205.519	1.93332
JA154.csv	MRC_U-Pb_second_ref011	0.0920461	0.01517	0.0237165	0.000756278	0.300858	0.041059	0.00791856	0.000181873	2.84302	0.14376	361.473	18.2228	#NUM!	#NUM!	-------------	151.101	6.61552	267.07	37.3181	159.421	6.02336	1469.29	292.862	-------------	42.1648	1.84606	0.0920461	0.01517	-------------	0.300858	0.0420394	0.0237165	0.00103835	0.31333	-------------	0.00791856	0.000299184	2.84302	0.14376		23.5289	209.133	1.91863
JA169.csv	MRC_U-Pb_second_ref012	0.0917986	0.0157724	0.0242169	0.000724882	0.30638	0.0433642	0.00763465	0.000155335	2.71327	0.116502	354.3	15.9256	#NUM!	#NUM!	-------------	154.252	6.53704	271.371	39.2625	153.727	5.5724	1464.11	304.415	-------------	41.2935	1.74998	0.0917986	0.0157724	-------------	0.30638	0.0443276	0.0242169	0.00102629	0.292912	-------------	0.00763465	0.000276745	2.71327	0.116502		23.4748	210.39	1.88164
JA184.csv	MRC_U-Pb_second_ref013	0.134039	0.0159443	0.0243915	0.000709257	0.450585	0.0450995	0.00789729	0.000166958	2.74665	0.1126	342.68	14.7855	#NUM!	#NUM!	-------------	155.351	6.49049	377.689	39.4648	158.995	5.83525	2184.57	160.071	-------------	40.9978	1.71287	0.134039	0.0159443	-------------	0.450585	0.0470818	0.0243915	0.00101907	0.181641	-------------	0.00789729	0.000289837	2.74665	0.1126		23.9608	209.998	1.96695
JA197.csv	MRC_U-Pb_second_ref014	0.0941649	0.0133982	0.0246762	0.000863661	0.320238	0.0383604	0.00769572	0.00015684	2.72674	0.136147	346.966	17.9323	#NUM!	#NUM!	-------------	157.142	7.24386	282.086	34.8338	154.952	5.61977	1513.01	255.379	-------------	40.5249	1.8681	0.0941649	0.0133982	-------------	0.320238	0.0395451	0.0246762	0.00113751	0.260955	-------------	0.00769572	0.000279106	2.72674	0.136147		23.8099	211.757	1.92846
MRC_second_ref_Improved_Deep_Model
JA004.csv	MRC_U-Pb_second_ref001	0.0970712	0.014621	0.0250126	0.000930614	0.334622	0.0456307	0.00767266	0.000165783	3.19921	0.156923	407.958	18.4954	#NUM!	#NUM!	-------------	159.258	7.61159	293.089	40.9227	154.49	5.71165	1571.29	269.986	------------	39.9799	1.9108	0.0970712	0.014621	------------	0.334622	0.0467219	0.0250126	0.00119545	0.0754751	------------	0.00767266	0.000165783	3.19921	0.156923		20.6308	222.445	2.08407
JA019.csv	MRC_U-Pb_second_ref002	0.0950139	0.0124409	0.0253952	0.000900534	0.332541	0.0395259	0.00775649	0.000153781	3.20988	0.147191	405.176	18.1482	#NUM!	#NUM!	-------------	161.664	7.50905	291.504	35.7348	156.171	5.61581	1530.22	236.216	------------	39.3775	1.82902	0.0950139	0.0124409	------------	0.332541	0.0407655	0.0253952	0.00117957	0.00522163	------------	0.00775649	0.000153781	3.20988	0.147191		21.2379	227.056	2.12241
JA034.csv	MRC_U-Pb_second_ref003	0.103999	0.0163206	0.0243816	0.000848452	0.34946	0.0479208	0.00736016	0.000158025	3.13203	0.134422	422.359	18.8874	#NUM!	#NUM!	-------------	155.288	7.13475	304.315	42.7171	148.22	5.46806	1703.5	282.397	------------	41.0146	1.88442	0.103999	0.0163206	------------	0.34946	0.0490541	0.0243816	0.00112022	0.225762	------------	0.00736016	0.000158025	3.13203	0.134422		21.7615	232.446	2.08111
JA049.csv	MRC_U-Pb_second_ref004	0.09163	0.0156394	0.0246806	0.000919047	0.311673	0.0465655	0.00759204	0.000163781	3.24447	0.158967	424.913	22.1071	#NUM!	#NUM!	-------------	157.17	7.51567	275.477	41.9791	152.873	5.6488	1460.57	302.535	------------	40.5177	1.93751	0.09163	0.0156394	------------	0.311673	0.047495	0.0246806	0.0011802	0.255458	------------	0.00759204	0.000163781	3.24447	0.158967		21.651	234.031	2.11998
JA064.csv	MRC_U-Pb_second_ref005	0.0965818	0.0133416	0.0242182	0.000784259	0.322362	0.0385406	0.00760585	0.000169229	3.18942	0.148967	413.399	18.489	#NUM!	#NUM!	-------------	154.26	6.80961	283.718	34.972	153.15	5.72021	1561.6	248.737	------------	41.2912	1.82274	0.0965818	0.0133416	------------	0.322362	0.0397354	0.0242182	0.00106908	0.187422	------------	0.00760585	0.000169229	3.18942	0.148967		21.5812	230.023	2.03985
JA079.csv	MRC_U-Pb_second_ref006	0.0782392	0.0125671	0.0256975	0.000835717	0.27709	0.037083	0.00781292	0.000194452	3.177	0.149156	405.394	19.355	#NUM!	#NUM!	-------------	163.564	7.23692	248.346	34.0611	157.303	6.13166	1152.2	290.989	------------	38.9143	1.72177	0.0782392	0.0125671	------------	0.27709	0.0380033	0.0256975	0.00113699	0.322601	------------	0.00781292	0.000194452	3.177	0.149156		21.4108	227.294	2.04352
JA094.csv	MRC_U-Pb_second_ref007	0.0869825	0.0179055	0.0258279	0.000947891	0.309618	0.0524032	0.00754359	0.000169002	3.26197	0.179076	415.172	21.6387	#NUM!	#NUM!	-------------	164.383	7.79204	273.885	47.0779	151.901	5.68747	1360.05	359.809	------------	38.7178	1.83529	0.0869825	0.0179055	------------	0.309618	0.05322	0.0258279	0.00122428	0.275768	------------	0.00754359	0.000169002	3.26197	0.179076		21.2952	231.163	2.03686
JA109.csv	MRC_U-Pb_second_ref008	0.0857066	0.0156945	0.0235791	0.000853727	0.278514	0.0431388	0.00739054	0.000153678	3.36836	0.164132	434.891	21.1262	#NUM!	#NUM!	-------------	150.236	7.06421	249.478	39.3596	148.83	5.43257	1331.35	323.575	------------	42.4105	1.99417	0.0857066	0.0156945	------------	0.278514	0.0439405	0.0235791	0.0011087	0.298038	------------	0.00739054	0.000153678	3.36836	0.164132		21.7872	236.897	2.0412
JA124.csv	MRC_U-Pb_second_ref009	0.106659	0.0176365	0.0250755	0.00115239	0.368599	0.052109	0.00779115	0.000177586	3.40882	0.21451	431.183	30.0317	#NUM!	#NUM!	-------------	159.654	8.7621	318.614	46.0457	156.866	5.9102	1752.11	296.369	------------	39.8795	2.18867	0.106659	0.0176365	------------	0.368599	0.0532694	0.0250755	0.00137619	0.223421	------------	0.00779115	0.000177586	3.40882	0.21451		17.7868	195.014	1.73953
JA139.csv	MRC_U-Pb_second_ref010	0.086101	0.0132937	0.0245465	0.000861257	0.291275	0.0377626	0.00790453	0.000141988	3.43073	0.137065	424.081	20.6429	#NUM!	#NUM!	-------------	156.326	7.21657	259.563	34.5404	159.14	5.56459	1340.28	276.336	------------	40.739	1.88066	0.086101	0.0132937	------------	0.291275	0.0387604	0.0245465	0.00113316	0.333648	------------	0.00790453	0.000141988	3.43073	0.137065		21.3533	231.598	2.0643
JA154.csv	MRC_U-Pb_second_ref011	0.108902	0.0167857	0.0250669	0.000801669	0.376222	0.0473673	0.00774945	0.000170488	3.39876	0.150064	435	20.8193	#NUM!	#NUM!	-------------	159.6	6.9984	324.255	41.9674	156.03	5.80465	1792.28	277.334	------------	39.8932	1.7493	0.108902	0.0167857	------------	0.376222	0.0486935	0.0250669	0.00109918	0.338797	------------	0.00774945	0.000170488	3.39876	0.150064		20.6811	229.834	2.02507
JA169.csv	MRC_U-Pb_second_ref012	0.0884304	0.01624	0.0250828	0.000998783	0.305692	0.0468044	0.00759257	0.000175635	3.34467	0.174352	437.117	25.1601	#NUM!	#NUM!	-------------	159.7	7.96193	270.836	42.2561	152.883	5.79165	1392.02	323.844	------------	39.8679	1.98764	0.0884304	0.01624	------------	0.305692	0.0476944	0.0250828	0.00125052	0.319544	------------	0.00759257	0.000175635	3.34467	0.174352		20.674	228.201	2.00413
JA184.csv	MRC_U-Pb_second_ref013	0.104586	0.0163761	0.0258218	0.000830645	0.372191	0.0477922	0.00763427	0.000146152	3.34444	0.162205	418.984	19.7116	#NUM!	#NUM!	-------------	164.345	7.22895	321.276	42.3653	153.719	5.47055	1714.32	281.889	------------	38.727	1.70346	0.104586	0.0163761	------------	0.372191	0.0490792	0.0258218	0.00113581	0.33357	------------	0.00763427	0.000146152	3.34444	0.162205		20.7548	226.779	2.03966
JA197.csv	MRC_U-Pb_second_ref014	0.105447	0.015246	0.02751	0.00105396	0.39979	0.0486868	0.00805134	0.000173147	3.18422	0.175131	389.084	21.8473	#NUM!	#NUM!	-------------	174.945	8.51287	341.496	42.831	162.084	5.98281	1730.09	261.803	------------	36.3504	1.76882	0.105447	0.015246	------------	0.39979	0.0501424	0.02751	0.00133864	0.238087	------------	0.00805134	0.000173147	3.18422	0.175131		18.8525	206.569	1.92019
MRC_Deep_Model
JA083.csv	MRC001	0.07606	0.0146717	0.0251646	0.000875306	0.263786	0.0419834	0.00798942	0.000168412	3.13896	0.165928	388.745	21.9894	#NUM!	#NUM!	-------------	160.214	7.35916	237.713	38.5	160.842	5.89732	1095.83	345.775	-------------	39.7384	1.82532	0.07606	0.0146717	-------------	0.263786	0.0427228	0.0251646	0.00115589	0.283609	-------------	0.00798942	0.000292934	3.13896	0.165928		23.379	235.836	2.14661
JA084.csv	MRC002	0.0845701	0.0112502	0.0249255	0.000688324	0.290514	0.0321336	0.00757953	0.000157128	2.9461	0.132213	389.375	16.2374	#NUM!	#NUM!	-------------	158.71	6.47141	258.964	29.6787	152.622	5.56547	1305.35	241.075	-------------	40.1195	1.63587	0.0845701	0.0112502	-------------	0.290514	0.0332945	0.0249255	0.00101634	0.320915	-------------	0.00757953	0.000276394	2.9461	0.132213		24.3776	248.222	2.15883
JA085.csv	MRC003	0.0874317	0.0130051	0.0264941	0.000932926	0.319245	0.0398517	0.00794224	0.000180001	2.93218	0.138161	369.79	17.6776	#NUM!	#NUM!	-------------	168.569	7.79787	281.322	36.1176	159.896	6.01186	1370.04	266.567	-------------	37.7443	1.74603	0.0874317	0.0130051	-------------	0.319245	0.0409864	0.0264941	0.0012256	0.303286	-------------	0.00794224	0.000298616	2.93218	0.138161		23.0772	236.337	2.18078
JA086.csv	MRC004	0.179464	0.0241375	0.0271909	0.00096276	0.672524	0.076622	0.00830973	0.000202083	3.10819	0.137081	370.696	18.8533	#NUM!	#NUM!	-------------	172.943	8.02592	522.246	61.5287	167.264	6.45952	2646.48	207.589	-------------	36.7769	1.70674	0.179464	0.0241375	-------------	0.672524	0.0792338	0.0271909	0.00126187	0.197115	-------------	0.00830973	0.000320911	3.10819	0.137081		24.1628	256.256	2.52076
JA087.csv	MRC005	0.0843325	0.013146	0.0236971	0.000861279	0.275421	0.035988	0.00736457	0.000137607	3.10266	0.162301	405.997	19.7381	#NUM!	#NUM!	-------------	150.979	7.11525	247.018	33.1166	148.309	5.24168	1299.87	279.448	-------------	42.1992	1.98874	0.0843325	0.013146	-------------	0.275421	0.0369243	0.0236971	0.00111678	0.332786	-------------	0.00736457	0.000260286	3.10266	0.162301		24.2666	252.711	2.13671
JA088.csv	MRC006	0.0935028	0.012325	0.0255163	0.000828817	0.328812	0.0364947	0.007848	0.000156071	2.51178	0.114458	318.506	14.758	#NUM!	#NUM!	-------------	162.425	7.18182	288.659	33.1878	158.006	5.68709	1499.46	237.57	-------------	39.1906	1.73286	0.0935028	0.012325	-------------	0.328812	0.0378043	0.0255163	0.00112823	0.226348	-------------	0.007848	0.000282472	2.51178	0.114458		26.8211	228.708	2.17957
JA089.csv	MRC007	0.100758	0.0137704	0.0245276	0.000623136	0.340596	0.0384645	0.00760353	0.000161261	2.56028	0.110997	327.672	12.808	#NUM!	#NUM!	-------------	156.207	6.14083	297.623	34.7771	153.103	5.62496	1642.72	247.263	-------------	40.7704	1.60277	0.100758	0.0137704	-------------	0.340596	0.0397985	0.0245276	0.000964231	0.336433	-------------	0.00760353	0.000279352	2.56028	0.110997		27.5878	234.109	2.13967
JA090.csv	MRC008	0.0816195	0.0106892	0.0243118	0.000748052	0.273474	0.0300391	0.0077733	0.000163328	2.56832	0.117607	336.202	14.8978	#NUM!	#NUM!	-------------	154.849	6.65443	245.468	27.9503	156.508	5.7323	1235.82	238.951	-------------	41.1323	1.76761	0.0816195	0.0106892	-------------	0.273474	0.0311393	0.0243118	0.00104477	0.249261	-------------	0.0077733	0.000284707	2.56832	0.117607		27.19	231.105	2.13463
JA096.csv	MRC009	0.118998	0.0153114	0.0259724	0.000810256	0.425949	0.0460846	0.00753734	0.00015955	2.53843	0.1182	328.664	15.6544	#NUM!	#NUM!	-------------	165.291	7.15397	360.296	40.4522	151.775	5.57261	1964.46	223.386	-------------	38.5024	1.66642	0.118998	0.0153114	-------------	0.425949	0.0478234	0.0259724	0.00112411	0.223982	-------------	0.00753734	0.000276742	2.53843	0.1182		24.7325	220.348	2.02977
JA097.csv	MRC010	0.103487	0.0152954	0.0253674	0.000860653	0.3618	0.0447701	0.00780654	0.000161951	2.58648	0.115038	329.19	16.3718	#NUM!	#NUM!	-------------	161.489	7.31365	313.557	39.9244	157.175	5.73285	1694.01	266.924	-------------	39.4206	1.78531	0.103487	0.0152954	-------------	0.3618	0.046067	0.0253674	0.00114886	0.319219	-------------	0.00780654	0.000284739	2.58648	0.115038		24.8338	217.561	2.06742
JA098.csv	MRC011	0.117756	0.0144041	0.0255587	0.000853674	0.414789	0.0431367	0.00781	0.000176707	2.58265	0.141543	322.529	15.9328	#NUM!	#NUM!	-------------	162.692	7.3041	352.318	38.134	157.244	5.90854	1944.06	216.797	-------------	39.1256	1.75656	0.117756	0.0144041	-------------	0.414789	0.0448956	0.0255587	0.00114747	0.137033	-------------	0.00781	0.000293465	2.58265	0.141543		23.8225	206.617	1.94507
JA099.csv	MRC012	0.109588	0.0132379	0.0246333	0.000849554	0.372042	0.0383922	0.00760443	0.00016884	2.64488	0.135087	345.609	18.4906	#NUM!	#NUM!	-------------	156.872	7.17067	321.166	34.5142	153.121	5.71485	1804.42	221.275	-------------	40.5954	1.85562	0.109588	0.0132379	-------------	0.372042	0.0399817	0.0246333	0.00112599	0.107255	-------------	0.00760443	0.000283816	2.64488	0.135087		25.2082	221.937	2.02933
JA100.csv	MRC013	0.0955512	0.0133399	0.0234613	0.000762093	0.308954	0.0361495	0.00778593	0.000134687	2.66901	0.117815	339.24	16.4211	#NUM!	#NUM!	-------------	149.494	6.6102	273.37	33.0206	156.762	5.42868	1541.04	251.048	-------------	42.6234	1.88468	0.0955512	0.0133399	-------------	0.308954	0.0373188	0.0234613	0.00103739	0.285102	-------------	0.00778593	0.000269628	2.66901	0.117815		28.8157	241.011	2.23536
JA101.csv	MRC014	0.0924304	0.0117678	0.0239355	0.000761316	0.304904	0.0327251	0.00765474	0.000177219	2.50396	0.12123	329.23	15.0225	#NUM!	#NUM!	-------------	152.481	6.66688	270.224	30.1145	154.13	5.84069	1477.3	229.874	-------------	41.7789	1.82669	0.0924304	0.0117678	-------------	0.304904	0.0339794	0.0239355	0.00104653	0.202979	-------------	0.00765474	0.000290073	2.50396	0.12123		28.9718	239.686	2.20409
JA102.csv	MRC015	0.086054	0.0108523	0.0245772	0.000766831	0.29148	0.0309618	0.00766241	0.000167901	2.46069	0.117764	310.647	13.0822	#NUM!	#NUM!	-------------	156.519	6.77476	259.724	28.6677	154.284	5.7317	1339.22	228.813	-------------	40.6882	1.76115	0.086054	0.0108523	-------------	0.29148	0.0321729	0.0245772	0.0010638	0.20376	-------------	0.00766241	0.000284661	2.46069	0.117764		29.0813	238.676	2.23978
JA103.csv	MRC016	0.0892706	0.0135248	0.0255988	0.00089669	0.314944	0.0399703	0.00791013	0.000162142	3.3574	0.180369	415.097	21.9702	#NUM!	#NUM!	-------------	162.944	7.51487	278.006	36.2547	159.252	5.78629	1410.3	270.838	-------------	39.0644	1.80163	0.0892706	0.0135248	-------------	0.314944	0.0410718	0.0255988	0.0011806	0.325846	-------------	0.00791013	0.000287408	3.3574	0.180369		21.6553	242.766	2.1481
JA104.csv	MRC017	0.0991062	0.0138651	0.0249265	0.000937029	0.340462	0.0404294	0.00792994	0.000151263	3.2979	0.151055	398.626	19.9597	#NUM!	#NUM!	-------------	158.717	7.63348	297.522	36.4403	159.65	5.67566	1611.05	252.336	-------------	40.1179	1.92947	0.0991062	0.0138651	-------------	0.340462	0.0416996	0.0249265	0.00119884	0.200161	-------------	0.00792994	0.000281915	3.2979	0.151055		21.8294	228.612	2.06652
JA105.csv	MRC018	0.089933	0.0161062	0.0238178	0.000862657	0.295207	0.0438895	0.00772263	0.000182509	3.16792	0.165442	409.573	22.0068	#NUM!	#NUM!	-------------	151.74	7.1363	262.65	39.8361	155.492	5.93832	1424.56	316.31	-------------	41.9854	1.97457	0.089933	0.0161062	-------------	0.295207	0.0447741	0.0238178	0.00112015	0.310081	-------------	0.00772263	0.000294931	3.16792	0.165442		22.1047	231.489	1.99876
JA111.csv	MRC019	0.103569	0.017653	0.023765	0.000888464	0.339212	0.0482481	0.00736665	0.00016011	3.14305	0.150436	433.266	24.4883	#NUM!	#NUM!	-------------	151.407	7.25754	296.574	43.1116	148.351	5.49575	1695.53	304.824	-------------	42.0788	2.01701	0.103569	0.017653	-------------	0.339212	0.0493096	0.023765	0.00113915	0.329749	-------------	0.00736665	0.000272903	3.14305	0.150436		22.0369	240.977	2.01813
JA112.csv	MRC020	0.10201	0.0158748	0.0253578	0.000986447	0.356499	0.0467718	0.00774019	0.000142112	3.19023	0.175591	416.556	24.8696	#NUM!	#NUM!	-------------	161.429	7.93023	309.597	41.6668	155.844	5.48141	1666.41	279.777	-------------	39.4356	1.93729	0.10201	0.0158748	-------------	0.356499	0.047979	0.0253578	0.00124571	0.286757	-------------	0.00774019	0.000272241	3.19023	0.175591		21.8837	239.163	2.08756
MRC_Improved_Deep_Model
JA066.csv	MRC001	0.102412	0.0137893	0.0238067	0.000903933	0.336012	0.0396158	0.00755196	0.000157657	2.96112	0.156805	386.916	20.6399	#NUM!	#NUM!	-------------	151.67	7.33946	294.146	35.7848	152.068	5.55793	1673.96	244.242	------------	42.005	2.03267	0.102412	0.0137893	------------	0.336012	0.0408782	0.0238067	0.00115203	0.09234	------------	0.00755196	0.000157657	2.96112	0.156805		25.2366	242.963	2.19714
JA067.csv	MRC002	0.0799591	0.0110733	0.0240932	0.000692827	0.265502	0.0313486	0.00743357	0.000152191	2.5791	0.116588	339.087	13.9264	#NUM!	#NUM!	-------------	153.473	6.37776	239.091	29.1272	149.693	5.43691	1195.3	252.679	------------	41.5055	1.72481	0.0799591	0.0110733	------------	0.265502	0.0323447	0.0240932	0.00100122	0.267694	------------	0.00743357	0.000152191	2.5791	0.116588		28.253	243.643	2.23604
JA068.csv	MRC003	0.101546	0.0144341	0.0247581	0.00104005	0.346487	0.0431542	0.00763476	0.000168254	2.56038	0.142673	332.358	19.5336	#NUM!	#NUM!	-------------	157.657	8.13841	302.075	38.6989	153.729	5.72251	1657.67	256.827	------------	40.3909	2.08502	0.101546	0.0144341	------------	0.346487	0.0443885	0.0247581	0.00127804	0.0928215	------------	0.00763476	0.000168254	2.56038	0.142673		25.2699	218.962	2.07796
JA069.csv	MRC004	0.112624	0.0142994	0.0255479	0.00085709	0.396544	0.0435112	0.00781401	0.000162108	2.54004	0.118728	331.712	16.4314	#NUM!	#NUM!	-------------	162.624	7.31896	339.139	38.5782	157.325	5.73833	1857.4	230.589	------------	39.1421	1.76161	0.112624	0.0142994	------------	0.396544	0.0451082	0.0255479	0.0011498	0.12258	------------	0.00781401	0.000162108	2.54004	0.118728		25.4635	224.151	2.14756
JA070.csv	MRC005	0.110542	0.0119885	0.0245798	0.000785947	0.374466	0.0354193	0.00768661	0.000139862	2.60615	0.116111	330.565	15.5034	#NUM!	#NUM!	-------------	156.536	6.86337	322.958	32.047	154.769	5.43036	1821.21	199.862	------------	40.6838	1.7838	0.110542	0.0119885	------------	0.374466	0.0371581	0.0245798	0.00107771	0.010677	------------	0.00768661	0.000139862	2.60615	0.116111		25.6799	218.24	2.07013
JA071.csv	MRC006	0.116073	0.0163685	0.0252604	0.000845237	0.40409	0.0485772	0.00769207	0.000166012	2.59654	0.132918	330.645	17.0257	#NUM!	#NUM!	-------------	160.816	7.22714	344.61	42.6974	154.879	5.7238	1916.06	248.448	------------	39.5877	1.77908	0.116073	0.0163685	------------	0.40409	0.050067	0.0252604	0.00113521	0.234837	------------	0.00769207	0.000166012	2.59654	0.132918		25.5643	217.79	2.10387
JA072.csv	MRC007	0.125109	0.0167455	0.0251585	0.000864466	0.433788	0.0497103	0.00786837	0.000153533	2.6247	0.123116	326.688	15.5969	#NUM!	#NUM!	-------------	160.176	7.3063	365.863	43.3392	158.415	5.66927	2060.88	201.947	------------	39.748	1.81308	0.125109	0.0167455	------------	0.433788	0.0513855	0.0251585	0.00114759	0.176045	------------	0.00786837	0.000153533	2.6247	0.123116		26.0535	219.909	2.1619
JA073.csv	MRC008	0.119125	0.0150315	0.0259003	0.000826248	0.42522	0.0457729	0.00764803	0.00018768	2.48887	0.116455	326.027	15.2056	#NUM!	#NUM!	-------------	164.839	7.2185	359.777	40.2041	153.996	5.96858	1966.53	219.462	------------	38.6096	1.69076	0.119125	0.0150315	------------	0.42522	0.0475172	0.0259003	0.00113421	0.165204	------------	0.00764803	0.00018768	2.48887	0.116455		25.6088	219.85	2.10641
JA074.csv	MRC009	0.0809376	0.0118431	0.0242598	0.000760514	0.27061	0.0332825	0.00760293	0.000164324	2.57699	0.110931	339.01	14.2515	#NUM!	#NUM!	-------------	154.522	6.70479	243.181	30.7859	153.091	5.6605	1219.3	265.267	------------	41.2205	1.78858	0.0809376	0.0118431	------------	0.27061	0.0342583	0.0242598	0.00105265	0.327785	------------	0.00760293	0.000164324	2.57699	0.110931		28.9053	245.037	2.27551
JA075.csv	MRC010	0.0828789	0.011867	0.0240372	0.000808323	0.274557	0.0331848	0.00759076	0.000150515	2.67021	0.136938	341.745	16.6391	#NUM!	#NUM!	-------------	153.12	6.90036	246.331	30.6765	152.847	5.49649	1265.87	258.939	------------	41.6023	1.8748	0.0828789	0.011867	------------	0.274557	0.0341917	0.0240372	0.00108323	0.272847	------------	0.00759076	0.000150515	2.67021	0.136938		28.5957	243.063	2.24623
JA081.csv	MRC011	0.0743568	0.0131489	0.0237343	0.000847526	0.243223	0.0357789	0.00759803	0.000135522	3.24617	0.160145	422	22.6296	#NUM!	#NUM!	-------------	151.214	7.05234	221.056	33.1875	152.993	5.33973	1050.31	321.363	------------	42.133	1.96501	0.0743568	0.0131489	------------	0.243223	0.0365154	0.0237343	0.00110693	0.310649	------------	0.00759803	0.000135522	3.24617	0.160145		24.0907	248.406	2.17427
JA082.csv	MRC012	0.098512	0.0142743	0.0252142	0.000845511	0.342327	0.0416135	0.00749751	0.000144197	2.95735	0.151521	400.074	23.3915	#NUM!	#NUM!	-------------	160.526	7.22272	298.933	37.4288	150.976	5.38012	1599.52	260.676	------------	39.6602	1.78447	0.098512	0.0142743	------------	0.342327	0.042862	0.0252142	0.00113449	0.301259	------------	0.00749751	0.000144197	2.95735	0.151521		24.546	245.186	2.1691
JA083.csv	MRC013	0.10796	0.0194829	0.0233337	0.000870639	0.347179	0.0521197	0.00751248	0.000173448	3.35222	0.184265	437.487	23.7915	#NUM!	#NUM!	-------------	148.691	7.11889	302.597	46.3251	151.277	5.72668	1775.5	320.098	------------	42.8565	2.05185	0.10796	0.0194829	------------	0.347179	0.0531502	0.0233337	0.00111715	0.312735	------------	0.00751248	0.000173448	3.35222	0.184265		23.6796	250.045	2.16559
JA084.csv	MRC014	0.077835	0.0141148	0.0242515	0.000813262	0.260148	0.0389734	0.00755385	0.000150133	3.20387	0.151385	419.966	20.949	#NUM!	#NUM!	-------------	154.47	6.95039	234.786	35.8722	152.106	5.47375	1141.9	325.379	------------	41.2345	1.85535	0.077835	0.0141148	------------	0.260148	0.0397471	0.0242515	0.0010912	0.294496	------------	0.00755385	0.000150133	3.20387	0.151385		23.5043	245.147	2.13054
JA085.csv	MRC015	0.0976707	0.015569	0.0245016	0.000850353	0.329811	0.0438193	0.0075558	0.000171274	3.30246	0.178215	420.412	20.9885	#NUM!	#NUM!	-------------	156.044	7.15848	289.421	39.4212	152.146	5.72082	1583.09	284.904	------------	40.8136	1.87232	0.0976707	0.015569	------------	0.329811	0.0449225	0.0245016	0.00112401	0.336803	------------	0.0075558	0.000171274	3.30246	0.178215		23.1642	247.949	2.14413
JA086.csv	MRC016	0.103085	0.0142979	0.0246484	0.000803944	0.350178	0.0406838	0.00726642	0.000150007	2.79103	0.110974	385.315	17.5734	#NUM!	#NUM!	-------------	156.967	6.95602	304.855	36.5799	146.339	5.32918	1686.53	251.353	------------	40.5706	1.7979	0.103085	0.0142979	------------	0.350178	0.0420183	0.0246484	0.0010923	0.27983	------------	0.00726642	0.000150007	2.79103	0.110974		27.5414	264.234	2.3064
JA087.csv	MRC017	0.109936	0.0139301	0.0242309	0.000678623	0.367125	0.0387595	0.00737199	0.000150453	2.60049	0.11795	345.683	15.0271	#NUM!	#NUM!	-------------	154.34	6.33427	317.521	34.8495	148.458	5.38662	1810.55	231.306	------------	41.2696	1.69374	0.109936	0.0139301	------------	0.367125	0.0402939	0.0242309	0.000994462	0.2692	------------	0.00737199	0.000150453	2.60049	0.11795		30.077	256.362	2.32081
JA088.csv	MRC018	0.0979882	0.0125725	0.0235891	0.000790031	0.31856	0.0345016	0.00736645	0.000146997	2.71021	0.121779	363.087	15.7213	#NUM!	#NUM!	-------------	150.3	6.75791	280.795	31.5565	148.347	5.34501	1589.31	232.228	------------	42.3924	1.90609	0.0979882	0.0125725	------------	0.31856	0.0358008	0.0235891	0.00106064	0.189071	------------	0.00736645	0.000146997	2.71021	0.121779		30.5957	270.187	2.40835
JA089.csv	MRC019	0.0865624	0.012153	0.0244482	0.000785423	0.291664	0.0341566	0.00755401	0.000137013	2.70813	0.118868	351.33	15.981	#NUM!	#NUM!	-------------	155.708	6.84419	259.868	31.4157	152.11	5.33247	1350.66	252.814	------------	40.9027	1.7979	0.0865624	0.012153	------------	0.291664	0.0352595	0.0244482	0.00107463	0.307146	------------	0.00755401	0.000137013	2.70813	0.118868		30.1458	264.259	2.43149
JA090.csv	MRC020	0.0883188	0.0128386	0.0244995	0.000741425	0.298206	0.0358988	0.00742361	0.000137723	2.56559	0.105412	342.975	15.312	#NUM!	#NUM!	-------------	156.03	6.64887	264.998	32.8768	149.494	5.27307	1389.58	260.732	------------	40.8171	1.73933	0.0883188	0.0128386	------------	0.298206	0.0369967	0.0244995	0.00104399	0.343473	------------	0.00742361	0.000137723	2.56559	0.105412		29.4647	252.012	2.30396
BZ2_Normal_Model
JA147.csv	BZ2001	0.67027	0.0174259	0.341819	0.00567544	31.5756	0.829162	0.0758493	0.000836455	2.33756	0.0454844	31.0167	0.727489	#NUM!	#NUM!	------------	1895.41	64.9904	3537.15	141.024	1477.72	47.232	4667.61	36.9604	------------	2.92553	0.100311	0.67027	0.0174259	------------	31.5756	1.2589	0.341819	0.0117204	0.7276	------------	0.0758493	0.000836455	2.33756	0.0454844		5.26945	58.7014	6.22039
JA148.csv	BZ2002	0.676581	0.0170745	0.33754	0.00468556	31.474	0.759973	0.0795842	0.000736842	2.43711	0.0450667	30.3112	0.588248	#NUM!	#NUM!	------------	1874.82	61.9741	3533.98	136.094	1547.77	48.5941	4681.12	35.8681	------------	2.96261	0.0979319	0.676581	0.0170745	------------	31.474	1.21207	0.33754	0.0111577	0.722255	------------	0.0795842	0.000736842	2.43711	0.0450667		5.20087	57.2268	6.28509
JA149.csv	BZ2003	0.67342	0.0190602	0.333361	0.00645433	30.9391	0.910624	0.0771488	0.000754991	2.44935	0.0559327	31.4089	0.791463	#NUM!	#NUM!	------------	1854.65	66.2208	3517.11	147.815	1502.12	47.4007	4674.37	40.1759	------------	2.99975	0.107107	0.67342	0.0190602	------------	30.9391	1.30028	0.333361	0.0119027	0.713072	------------	0.0771488	0.000754991	2.44935	0.0559327		5.41645	59.8875	6.37997
JA150.csv	BZ2004	0.692812	0.0219085	0.366254	0.00649917	34.9707	1.06582	0.0828405	0.00102943	2.3355	0.0520406	28.1438	0.719816	#NUM!	#NUM!	------------	2011.75	70.12	3637.82	155.573	1608.64	52.2357	4715.24	44.7214	------------	2.73034	0.0951666	0.692812	0.0219085	------------	34.9707	1.49554	0.366254	0.0127659	0.652015	------------	0.0828405	0.00102943	2.3355	0.0520406		4.55645	49.8963	5.85858
JA151.csv	BZ2005	0.689273	0.0198828	0.363136	0.00640002	34.4959	0.989013	0.0808629	0.000892569	2.30094	0.0487102	28.6227	0.700251	#NUM!	#NUM!	------------	1997.02	69.4842	3624.33	150.398	1571.7	50.2412	4707.87	40.8683	------------	2.75379	0.0958149	0.689273	0.0198828	------------	34.4959	1.43147	0.363136	0.0126349	0.692777	------------	0.0808629	0.000892569	2.30094	0.0487102		4.79948	52.9369	6.07475
JA152.csv	BZ2006	0.663719	0.0176844	0.313159	0.00544203	28.6454	0.778548	0.0724877	0.000794823	2.42846	0.0519304	33.3203	0.823048	#NUM!	#NUM!	------------	1756.23	60.8881	3441.44	139.312	1414.47	45.1796	4653.45	37.8922	------------	3.19327	0.11071	0.663719	0.0176844	------------	28.6454	1.15959	0.313159	0.0108571	0.723483	------------	0.0724877	0.000794823	2.42846	0.0519304		5.69938	63.5465	6.34494
JA157.csv	BZ2007	0.680986	0.0181529	0.339214	0.0052456	31.8359	0.824151	0.0766733	0.0008694	2.41915	0.0557893	31.323	0.708997	#NUM!	#NUM!	------------	1882.89	63.5494	3545.23	140.481	1493.2	47.8889	4690.46	37.8415	------------	2.948	0.099498	0.680986	0.0181529	------------	31.8359	1.26151	0.339214	0.0114488	0.709855	------------	0.0766733	0.0008694	2.41915	0.0557893		5.35409	59.7784	6.33876
JA158.csv	BZ2008	0.708379	0.019611	0.381547	0.0064841	37.2494	1.0203	0.0873672	0.000930907	2.36145	0.05008	27.0548	0.631702	#NUM!	#NUM!	------------	2083.51	71.8373	3700.19	150.314	1692.96	53.8972	4747.16	39.1728	------------	2.62091	0.0903663	0.708379	0.019611	------------	37.2494	1.5132	0.381547	0.0131554	0.704186	------------	0.0873672	0.000930907	2.36145	0.05008		4.43303	48.3553	5.88957
JA159.csv	BZ2009	0.709418	0.018324	0.370179	0.00690586	36.1926	0.989039	0.0852432	0.00095847	2.38565	0.0520801	27.9125	0.6974	#NUM!	#NUM!	------------	2030.24	71.7233	3671.74	149.001	1653.44	52.9728	4749.27	36.5802	------------	2.70139	0.0954332	0.709418	0.018324	------------	36.1926	1.46871	0.370179	0.0130775	0.742057	------------	0.0852432	0.00095847	2.38565	0.0520801		4.59986	49.5332	5.92096
JA160.csv	BZ2010	0.700462	0.0199691	0.381578	0.00646321	36.8361	1.02155	0.0856983	0.000925928	2.34401	0.0474657	27.4252	0.597239	#NUM!	#NUM!	------------	2083.65	71.7847	3689.15	150.718	1661.92	52.9924	4731.02	40.3526	------------	2.6207	0.0902866	0.700462	0.0199691	------------	36.8361	1.50492	0.381578	0.0131459	0.690322	------------	0.0856983	0.000925928	2.34401	0.0474657		4.57753	50.4979	6.0419
JA161.csv	BZ2011	0.709633	0.0200103	0.351546	0.00628684	34.3813	0.965193	0.0817214	0.000916067	2.37985	0.0552024	29.0482	0.703233	#NUM!	#NUM!	------------	1941.98	67.8252	3621.04	148.776	1587.74	50.8489	4749.7	39.8844	------------	2.84458	0.0993494	0.709633	0.0200103	------------	34.3813	1.41261	0.351546	0.0122781	0.701327	------------	0.0817214	0.000916067	2.37985	0.0552024		4.80931	51.6808	5.87432
JA162.csv	BZ2012	0.699839	0.0184451	0.342785	0.00529946	33.0618	0.839759	0.0797833	0.000806423	2.4425	0.0525113	30.4368	0.735048	#NUM!	#NUM!	------------	1900.06	64.1254	3582.45	140.82	1551.5	49.1158	4729.74	37.3504	------------	2.91728	0.0984559	0.699839	0.0184451	------------	33.0618	1.2996	0.342785	0.0115687	0.712146	------------	0.0797833	0.000806423	2.4425	0.0525113		4.97503	54.035	5.9148
JA166.csv	BZ2013	0.681587	0.0200426	0.332045	0.0050153	31.1907	0.847388	0.0769807	0.00074908	2.44785	0.0497072	31.4879	0.698455	#NUM!	#NUM!	------------	1848.29	62.0799	3525.08	142.672	1498.97	47.2755	4691.73	41.6814	------------	3.01164	0.101154	0.681587	0.0200426	------------	31.1907	1.26239	0.332045	0.0111527	0.662618	------------	0.0769807	0.00074908	2.44785	0.0497072		5.46406	60.2903	6.37293
JA167.csv	BZ2014	0.695932	0.0184534	0.369275	0.0059554	35.4179	0.921249	0.0831105	0.000939064	2.39255	0.052053	28.5376	0.705811	#NUM!	#NUM!	------------	2025.99	69.0053	3650.36	144.941	1613.68	51.7303	4721.7	37.5882	------------	2.70801	0.092235	0.695932	0.0184534	------------	35.4179	1.4063	0.369275	0.0125775	0.714864	------------	0.0831105	0.000939064	2.39255	0.052053		4.8441	53.2887	6.17112
JA168.csv	BZ2015	0.688395	0.0159336	0.356866	0.00575676	33.857	0.814646	0.0775254	0.00104096	2.39623	0.0486996	31.1051	0.773252	#NUM!	#NUM!	------------	1967.3	67.0103	3605.88	138.672	1509.19	49.6038	4706.04	32.8935	------------	2.80217	0.0954478	0.688395	0.0159336	------------	33.857	1.30204	0.356866	0.0121556	0.764711	------------	0.0775254	0.00104096	2.39623	0.0486996		4.8446	56.7597	6.01646
JA169.csv	BZ2016	0.746551	0.0218214	0.498466	0.00873822	51.2862	1.46666	0.111033	0.00140173	2.32672	0.0596671	20.983	0.521919	#NUM!	#NUM!	------------	2607.2	90.5906	4017.6	166.516	2128.16	69.2674	4822.39	41.181	------------	2.00616	0.0697066	0.746551	0.0218214	------------	51.2862	2.12564	0.498466	0.0173199	0.684237	------------	0.111033	0.00140173	2.32672	0.0596671		2.96074	32.6062	5.13038
JA170.csv	BZ2017	0.755629	0.0265664	0.507656	0.00927662	52.8669	1.73398	0.113843	0.00135717	2.34293	0.0570859	20.4837	0.536472	#NUM!	#NUM!	------------	2646.61	92.9681	4047.84	179.925	2179.21	70.3491	4839.67	49.3421	------------	1.96984	0.0691949	0.755629	0.0265664	------------	52.8669	2.34992	0.507656	0.0178325	0.599981	------------	0.113843	0.00135717	2.34293	0.0570859		2.76468	30.0425	4.88696
JA171.csv	BZ2018	0.697337	0.0209597	0.343641	0.00630858	33.0258	0.980596	0.0753301	0.000850543	2.47355	0.0600527	32.3835	0.892717	#NUM!	#NUM!	------------	1904.16	66.9717	3581.38	151.167	1467.97	47.0548	4724.59	42.5228	------------	2.91002	0.102349	0.697337	0.0209597	------------	33.0258	1.39399	0.343641	0.0120863	0.67873	------------	0.0753301	0.000850543	2.47355	0.0600527		4.90021	57.8331	6.00658
JA176.csv	BZ2019	0.679504	0.0172819	0.346812	0.00534436	32.4782	0.815984	0.07463	0.000849932	2.47269	0.0546096	33.0285	0.74604	#NUM!	#NUM!	------------	1919.36	64.7329	3564.9	139.497	1454.8	46.6831	4687.32	36.1331	------------	2.88341	0.0972469	0.679504	0.0172819	------------	32.4782	1.2709	0.346812	0.0116967	0.728113	------------	0.07463	0.000849932	2.47269	0.0546096		4.9307	60.1368	6.10116
JA177.csv	BZ2020	0.711113	0.0213803	0.428306	0.00713785	41.9758	1.20893	0.0927431	0.000965247	2.36799	0.0541257	25.6462	0.629371	#NUM!	#NUM!	------------	2298.08	78.8656	3818.49	158.799	1792.65	56.9238	4752.69	42.479	------------	2.33478	0.0801252	0.711113	0.0213803	------------	41.9758	1.74565	0.428306	0.0146987	0.666781	------------	0.0927431	0.000965247	2.36799	0.0541257		3.6944	42.951	5.57484
JA178.csv	BZ2021	0.731732	0.02105	0.416586	0.00768675	42.0109	1.22261	0.0901739	0.00112273	2.45689	0.0560941	27.0399	0.651302	#NUM!	#NUM!	------------	2244.96	79.0682	3819.32	159.634	1745.07	56.6817	4793.68	40.5935	------------	2.40047	0.0845451	0.731732	0.02105	------------	42.0109	1.7559	0.416586	0.0146723	0.699637	------------	0.0901739	0.00112273	2.45689	0.0560941		3.45075	41.47	5.21764
JA179.csv	BZ2022	0.696775	0.0201961	0.346552	0.00603998	33.2787	0.952559	0.0792472	0.000885617	2.4776	0.0548414	31.0199	0.788017	#NUM!	#NUM!	------------	1918.11	66.5495	3588.9	148.812	1541.46	49.3482	4723.43	41.0319	------------	2.88557	0.100116	0.696775	0.0201961	------------	33.2787	1.37989	0.346552	0.0120237	0.689177	------------	0.0792472	0.000885617	2.4776	0.0548414		4.77117	55.2672	6.00872
JA180.csv	BZ2023	0.706582	0.0179599	0.341976	0.00571823	33.3016	0.866564	0.0756036	0.00088871	2.48356	0.0552354	32.6845	0.68906	#NUM!	#NUM!	------------	1896.17	65.1244	3589.57	142.553	1473.11	47.4646	4743.52	36.0148	------------	2.92418	0.100432	0.706582	0.0179599	------------	33.3016	1.32251	0.341976	0.0117453	0.737066	------------	0.0756036	0.00088871	2.48356	0.0552354		4.8361	57.8619	6.03906
JA181.csv	BZ2024	0.709282	0.0196273	0.402287	0.00714925	39.3243	1.10407	0.0900523	0.000973486	2.32724	0.0532051	25.6965	0.662017	#NUM!	#NUM!	------------	2179.56	75.9985	3753.82	154.239	1742.81	55.5753	4748.99	39.1524	------------	2.48579	0.0866763	0.709282	0.0196273	------------	39.3243	1.61578	0.402287	0.0140272	0.711364	------------	0.0900523	0.000973486	2.32724	0.0532051		4.0632	44.7293	5.72197
JA185.csv	BZ2025	0.683784	0.0202708	0.350107	0.0057442	32.9932	0.938618	0.0790486	0.000984555	2.46494	0.0514427	31.4968	0.737728	#NUM!	#NUM!	------------	1935.11	66.1679	3580.4	148.029	1537.74	49.95	4696.36	42.006	------------	2.85627	0.0976658	0.683784	0.0202708	------------	32.9932	1.36408	0.350107	0.0119713	0.67189	------------	0.0790486	0.000984555	2.46494	0.0514427		4.82542	56.1285	6.0776
JA186.csv	BZ2026	0.689343	0.0206505	0.355392	0.00664835	33.7636	1.01317	0.0787372	0.000827119	2.42639	0.0533331	30.7524	0.764663	#NUM!	#NUM!	------------	1960.3	69.3057	3603.16	152.889	1531.91	48.6932	4708.02	42.4171	------------	2.81379	0.0994808	0.689343	0.0206505	------------	33.7636	1.43266	0.355392	0.0125648	0.684262	------------	0.0787372	0.000827119	2.42639	0.0533331		4.88035	56.4047	6.10985
JA187.csv	BZ2027	0.689255	0.0181641	0.362809	0.00645827	34.4638	0.938844	0.0804179	0.000829395	2.39092	0.0538284	29.872	0.738657	#NUM!	#NUM!	------------	1995.48	69.6094	3623.41	146.831	1563.37	49.5954	4707.83	37.3853	------------	2.75627	0.0961486	0.689255	0.0181641	------------	34.4638	1.39657	0.362809	0.0126561	0.730226	------------	0.0804179	0.000829395	2.39092	0.0538284		4.67871	53.5047	5.97436
JA188.csv	BZ2028	0.71129	0.0217872	0.3453	0.00595646	33.8493	0.998948	0.0765614	0.000863942	2.47086	0.05159	31.7974	0.778043	#NUM!	#NUM!	------------	1912.11	66.1704	3605.66	151.735	1491.1	47.7928	4753.05	43.2631	------------	2.89603	0.10022	0.71129	0.0217872	------------	33.8493	1.42446	0.3453	0.0119494	0.662732	------------	0.0765614	0.000863942	2.47086	0.05159		4.85902	56.4482	6.00349
JA189.csv	BZ2029	0.688947	0.0181529	0.365586	0.00608955	34.7121	0.919002	0.0797313	0.00101475	2.4256	0.0524818	30.4361	0.66542	#NUM!	#NUM!	------------	2008.6	68.9231	3630.49	145.262	1550.52	50.5286	4707.19	37.3801	------------	2.73534	0.0938605	0.688947	0.0181529	------------	34.7121	1.38888	0.365586	0.0125447	0.722573	------------	0.0797313	0.00101475	2.4256	0.0524818		4.57075	53.7557	5.94228
JA190.csv	BZ2030	0.706625	0.0206097	0.373931	0.00658508	36.4156	1.04787	0.0822633	0.000898738	2.45219	0.0581658	29.6423	0.747689	#NUM!	#NUM!	------------	2047.87	71.2391	3677.81	152.885	1597.87	51.0158	4743.6	41.2449	------------	2.67429	0.09303	0.706625	0.0206097	------------	36.4156	1.51378	0.373931	0.0130079	0.687197	------------	0.0822633	0.000898738	2.45219	0.0581658		4.36831	51.696	5.88874
BZ2_Deep_Model
JA006.csv	BZ2001	0.661198	0.0229123	0.364419	0.00846132	33.2077	1.20537	0.0813882	0.00113643	2.42823	0.0671987	29.863	0.889491	#NUM!	#NUM!	-------------	2003.08	75.9881	3586.79	168.905	1581.52	52.3329	4647.96	49.0887	-------------	2.7441	0.104099	0.661198	0.0229123	-------------	33.2077	1.56377	0.364419	0.0138244	0.659378	-------------	0.0813882	0.00269316	2.42823	0.0671987		5.57676	63.0858	7.27773
JA007.csv	BZ2002	0.732455	0.0223839	0.43091	0.00976557	43.4984	1.4551	0.0940424	0.00152569	2.37073	0.0633993	25.1024	0.81238	#NUM!	#NUM!	-------------	2309.82	86.8442	3853.84	173.166	1816.66	61.9586	4795.1	43.0802	-------------	2.32067	0.0872521	0.732455	0.0223839	-------------	43.4984	1.95454	0.43091	0.0162013	0.709925	-------------	0.0940424	0.00320738	2.37073	0.0633993		4.38285	50.1436	6.80043
JA008.csv	BZ2003	0.731328	0.022373	0.462069	0.00982706	46.572	1.51557	0.102957	0.00147913	2.47571	0.0718974	23.8006	0.692423	#NUM!	#NUM!	-------------	2448.69	90.0474	3921.66	173.575	1980.68	65.8826	4792.89	43.1293	-------------	2.16418	0.0795849	0.731328	0.022373	-------------	46.572	2.06131	0.462069	0.016992	0.699	-------------	0.102957	0.0034246	2.47571	0.0718974		3.89877	44.9257	6.60551
JA009.csv	BZ2004	0.697297	0.0262504	0.498852	0.0127807	47.9398	1.90262	0.111425	0.00161943	2.37632	0.0729271	21.0275	0.598973	#NUM!	#NUM!	-------------	2608.86	102.923	3950.44	196.537	2135.29	71.18	4724.51	53.0501	-------------	2.0046	0.0790839	0.697297	0.0262504	-------------	47.9398	2.38503	0.498852	0.0196803	0.640516	-------------	0.111425	0.00371438	2.37632	0.0729271		3.67785	40.7055	6.57685
JA010.csv	BZ2005	0.715354	0.0269854	0.502378	0.0116584	49.5288	1.89316	0.105979	0.00144262	2.30485	0.0729375	21.7942	0.656339	#NUM!	#NUM!	-------------	2624.01	99.5234	3982.88	193.53	2035.99	67.0733	4761.23	53.0647	-------------	1.99053	0.0754971	0.715354	0.0269854	-------------	49.5288	2.40663	0.502378	0.0190542	0.617637	-------------	0.105979	0.00349134	2.30485	0.0729375		3.73862	42.6481	6.57731
JA011.csv	BZ2006	0.733286	0.0274143	0.561309	0.0142146	56.7259	2.2314	0.123492	0.00184101	2.20552	0.0696892	18.0629	0.600815	#NUM!	#NUM!	-------------	2872.04	112.755	4118.1	203.726	2353.54	78.8435	4796.72	52.5118	-------------	1.78155	0.0699426	0.733286	0.0274143	-------------	56.7259	2.80628	0.561309	0.0220367	0.641282	-------------	0.123492	0.00413697	2.20552	0.0696892		2.97691	31.813	5.86275
JA012.csv	BZ2007	0.755609	0.0290238	0.597641	0.0152262	62.2362	2.49376	0.133007	0.00204532	2.30197	0.0735732	17.4296	0.638367	#NUM!	#NUM!	-------------	3020.33	118.875	4210.67	210.767	2524.01	85.0882	4839.64	53.8174	-------------	1.67324	0.0658562	0.755609	0.0290238	-------------	62.2362	3.11526	0.597641	0.0235222	0.629208	-------------	0.133007	0.00448388	2.30197	0.0735732		2.93995	31.507	6.16977
JA013.csv	BZ2008	0.662317	0.0221794	0.364413	0.00747986	33.2634	1.12717	0.0764698	0.00132239	2.40333	0.0764907	31.5337	0.849827	#NUM!	#NUM!	-------------	2003.06	72.8108	3588.44	162.405	1489.38	51.5731	4650.4	47.4614	-------------	2.74414	0.0997488	0.662317	0.0221794	-------------	33.2634	1.50543	0.364413	0.0132463	0.652893	-------------	0.0764698	0.00264794	2.40333	0.0764907		5.92427	71.3892	7.72628
JA014.csv	BZ2009	0.706405	0.0255556	0.401271	0.00857979	39.0658	1.41157	0.0895847	0.00128252	2.44849	0.0715445	27.3394	0.835527	#NUM!	#NUM!	-------------	2174.89	80.1224	3747.3	175.987	1734.14	57.6443	4743.16	50.974	-------------	2.49208	0.0918078	0.706405	0.0255556	-------------	39.0658	1.83468	0.401271	0.0147827	0.622491	-------------	0.0895847	0.00297787	2.44849	0.0715445		4.75823	54.5509	6.91922
JA015.csv	BZ2010	0.678847	0.0235067	0.345737	0.00681347	32.3462	1.10436	0.076972	0.00108815	2.49585	0.0614566	32.5041	0.913366	#NUM!	#NUM!	-------------	1914.21	68.7084	3560.89	161.841	1498.81	49.7065	4685.93	48.9634	-------------	2.89237	0.103818	0.678847	0.0235067	-------------	32.3462	1.47012	0.345737	0.0124098	0.629836	-------------	0.076972	0.0025527	2.49585	0.0614566		6.26962	73.8873	7.94872
JA021.csv	BZ2011	0.709897	0.0280218	0.438129	0.00985442	42.8651	1.66897	0.0879453	0.00112391	2.4382	0.0644628	27.2995	0.803232	#NUM!	#NUM!	-------------	2342.26	87.8236	3839.28	188.71	1703.71	55.5554	4750.24	55.5049	-------------	2.28243	0.0855802	0.709897	0.0280218	-------------	42.8651	2.10692	0.438129	0.0164278	0.587018	-------------	0.0879453	0.00286777	2.4382	0.0644628		4.08359	51.4541	6.48366
JA022.csv	BZ2012	0.67495	0.0239039	0.408473	0.0084605	37.9962	1.33912	0.0895709	0.00141777	2.3931	0.0633958	26.654	0.671003	#NUM!	#NUM!	-------------	2207.93	80.4915	3719.82	172.164	1733.88	58.8127	4677.64	50.0776	-------------	2.44815	0.0892485	0.67495	0.0239039	-------------	37.9962	1.75858	0.408473	0.0148911	0.627298	-------------	0.0895709	0.00303821	2.3931	0.0633958		4.7296	54.5156	6.94643
JA023.csv	BZ2013	0.704615	0.027001	0.475937	0.0118546	46.2175	1.83265	0.0966513	0.00147402	2.43151	0.0655687	24.6345	0.799309	#NUM!	#NUM!	-------------	2509.54	97.853	3914.06	194.617	1864.81	62.7581	4739.51	53.9433	-------------	2.10112	0.0819276	0.704615	0.027001	-------------	46.2175	2.29806	0.475937	0.0185579	0.625205	-------------	0.0966513	0.0032527	2.43151	0.0655687		3.74511	46.4863	6.40796
JA024.csv	BZ2014	0.700889	0.0256044	0.40676	0.00881794	39.291	1.43565	0.088019	0.00127601	2.41496	0.0676981	27.4791	0.777101	#NUM!	#NUM!	-------------	2200.09	81.4318	3752.99	177.429	1705.08	56.8116	4731.9	51.4912	-------------	2.45845	0.0909946	0.700889	0.0256044	-------------	39.291	1.85755	0.40676	0.0150554	0.620198	-------------	0.088019	0.00293271	2.41496	0.0676981		5.03837	59.1395	7.41928
JA025.csv	BZ2015	0.696984	0.0225015	0.376554	0.0073176	36.1707	1.1739	0.0824162	0.00103759	2.4416	0.0662448	29.8047	0.780173	#NUM!	#NUM!	-------------	2060.17	73.6389	3671.14	162.25	1600.72	52.0789	4723.87	45.6225	-------------	2.65566	0.0949242	0.696984	0.0225015	-------------	36.1707	1.5986	0.376554	0.0134596	0.661078	-------------	0.0824162	0.00268138	2.4416	0.0662448		5.64221	65.9829	7.71756
JA026.csv	BZ2016	0.642046	0.0230718	0.393283	0.00865652	34.7999	1.2651	0.083993	0.00120914	2.44888	0.0720614	29.0431	0.843902	#NUM!	#NUM!	-------------	2138.04	79.5534	3632.98	171.236	1630.15	54.2434	4605.51	50.9773	-------------	2.5427	0.0946101	0.642046	0.0230718	-------------	34.7999	1.64025	0.393283	0.0146335	0.631425	-------------	0.083993	0.00279488	2.44888	0.0720614		4.99856	59.3954	6.96565
JA027.csv	BZ2017	0.661911	0.0237189	0.379699	0.00877387	34.6374	1.28035	0.0845835	0.00120204	2.35758	0.0610333	27.7087	0.820136	#NUM!	#NUM!	-------------	2074.88	78.5706	3628.37	172.733	1641.15	54.4794	4649.52	50.7271	-------------	2.63366	0.0997304	0.661911	0.0237189	-------------	34.6374	1.64896	0.379699	0.0143783	0.642425	-------------	0.0845835	0.00280782	2.35758	0.0610333		6.06402	66.7256	8.06574
JA028.csv	BZ2018	0.679509	0.0206057	0.331703	0.00670052	31.0635	0.984362	0.0786766	0.0010965	2.35925	0.0609591	30.2519	0.902431	#NUM!	#NUM!	-------------	1846.63	66.7871	3521.06	153.648	1530.77	50.6367	4687.34	42.972	-------------	3.01475	0.109034	0.679509	0.0206057	-------------	31.0635	1.35551	0.331703	0.0119967	0.694666	-------------	0.0786766	0.00260256	2.35925	0.0609591		6.44662	68.3868	7.69597
JA029.csv	BZ2019	0.667653	0.0241702	0.388503	0.00874214	35.7479	1.31635	0.0865147	0.00141066	2.27269	0.059247	26.2909	0.83295	#NUM!	#NUM!	-------------	2115.88	79.3483	3659.52	173.815	1677.11	57.2647	4661.97	51.2069	-------------	2.57398	0.0965276	0.667653	0.0241702	-------------	35.7479	1.69791	0.388503	0.0145694	0.632083	-------------	0.0865147	0.00295403	2.27269	0.059247		5.26887	56.8312	7.16542
JA030.csv	BZ2020	0.660675	0.0238464	0.377517	0.00840969	34.374	1.25866	0.0857137	0.00141774	2.3238	0.0601362	27.4364	0.804346	#NUM!	#NUM!	-------------	2064.67	77.149	3620.83	171.399	1662.2	56.9431	4646.82	51.0951	-------------	2.64889	0.0989791	0.660675	0.0238464	-------------	34.374	1.62716	0.377517	0.0141064	0.631568	-------------	0.0857137	0.00293635	2.3238	0.0601362		5.25672	57.4655	6.96435
BZ2_Improved_Deep_Model
JA006.csv	BZ2001	0.677565	0.0214685	0.309611	0.00709323	28.9117	1.03667	0.0722434	0.000936729	2.48786	0.073997	34.4589	0.975786	#NUM!	#NUM!	-------------	1738.79	65.635	3450.52	161.317	1409.87	46.0775	4683.21	44.8771	------------	3.22986	0.121919	0.677565	0.0214685	------------	28.9117	1.35166	0.309611	0.011687	0.710197	------------	0.0722434	0.000936729	2.48786	0.073997		6.84614	76.0375	8.36764
JA007.csv	BZ2002	0.658147	0.0222654	0.308077	0.00650668	27.944	1.01254	0.0717763	0.00103315	2.40253	0.0658235	33.0577	0.875338	#NUM!	#NUM!	-------------	1731.24	63.517	3417.13	160.749	1401.06	46.6194	4641.29	47.9601	------------	3.24594	0.119089	0.658147	0.0222654	------------	27.944	1.31454	0.308077	0.011303	0.670521	------------	0.0717763	0.00103315	2.40253	0.0658235		7.11511	75.5653	8.32708
JA008.csv	BZ2003	0.659916	0.0238637	0.300645	0.00700224	27.3432	1.07038	0.0699697	0.000908468	2.38713	0.0720008	33.9283	0.909866	#NUM!	#NUM!	-------------	1694.51	64.3569	3395.83	167.481	1366.96	44.6847	4645.16	51.1933	------------	3.32618	0.126327	0.659916	0.0238637	------------	27.3432	1.34855	0.300645	0.0114184	0.658575	------------	0.0699697	0.000908468	2.38713	0.0720008		7.12715	76.1512	8.15723
JA009.csv	BZ2004	0.667408	0.0262452	0.31555	0.00761748	29.0245	1.21516	0.0731238	0.000919281	2.43471	0.0664243	33.2974	0.911841	#NUM!	#NUM!	-------------	1767.96	68.0781	3454.35	177.918	1426.45	46.3991	4661.44	55.5351	------------	3.16907	0.12203	0.667408	0.0262452	------------	29.0245	1.49493	0.31555	0.0121507	0.627537	------------	0.0731238	0.000919281	2.43471	0.0664243		6.87104	75.9361	8.45014
JA010.csv	BZ2005	0.699901	0.0243815	0.388256	0.0103664	37.4507	1.51229	0.0820857	0.00111556	2.38729	0.0676104	28.8603	0.8786	#NUM!	#NUM!	-------------	2114.73	84.9293	3705.52	186.407	1594.55	52.5161	4729.87	49.1491	------------	2.57562	0.103439	0.699901	0.0243815	------------	37.4507	1.88397	0.388256	0.0155926	0.700386	------------	0.0820857	0.00111556	2.38729	0.0676104		4.72666	54.8894	6.98962
JA011.csv	BZ2006	0.659625	0.0250491	0.379296	0.00872944	34.4811	1.3877	0.0789914	0.00106433	2.28467	0.0561799	28.8713	0.697706	#NUM!	#NUM!	-------------	2072.99	78.3823	3623.9	181.907	1536.67	50.5363	4644.52	53.7111	------------	2.63647	0.0996879	0.659625	0.0250491	------------	34.4811	1.73083	0.379296	0.0143416	0.63417	------------	0.0789914	0.00106433	2.28467	0.0561799		5.13959	59.0204	7.20267
JA012.csv	BZ2007	0.683591	0.0244638	0.340875	0.00781121	32.1142	1.24072	0.0711723	0.00100948	2.45161	0.0647051	34.0945	0.89624	#NUM!	#NUM!	-------------	1890.88	71.3817	3553.8	173.833	1389.66	46.1146	4695.96	50.5484	------------	2.93363	0.110746	0.683591	0.0244638	------------	32.1142	1.57085	0.340875	0.0128682	0.659884	------------	0.0711723	0.00100948	2.45161	0.0647051		5.67258	68.9362	7.53695
JA013.csv	BZ2008	0.697139	0.0243664	0.371843	0.010283	35.726	1.46746	0.0779557	0.00116247	2.44198	0.0780714	31.1694	0.98763	#NUM!	#NUM!	-------------	2038.07	83.156	3658.92	186.108	1517.26	50.8308	4724.19	49.3237	------------	2.68931	0.109728	0.697139	0.0243664	------------	35.726	1.81718	0.371843	0.0151717	0.705979	------------	0.0779557	0.00116247	2.44198	0.0780714		4.94485	59.9091	7.14472
JA014.csv	BZ2009	0.703537	0.0237703	0.362329	0.00967097	35.1315	1.39375	0.0759402	0.00126971	2.41239	0.0693645	31.8082	0.931354	#NUM!	#NUM!	-------------	1993.2	80.0369	3642.35	181.165	1479.43	50.8105	4737.31	47.6784	------------	2.75992	0.110824	0.703537	0.0237703	------------	35.1315	1.74738	0.362329	0.0145493	0.712176	------------	0.0759402	0.00126971	2.41239	0.0693645		5.24983	64.0443	7.38801
JA015.csv	BZ2010	0.681261	0.0249828	0.371144	0.00905214	34.8467	1.39787	0.0735918	0.00106773	2.40475	0.0656364	32.7725	0.928586	#NUM!	#NUM!	-------------	2034.78	78.6717	3634.31	182.05	1435.27	47.8292	4691.04	51.7858	------------	2.69437	0.104174	0.681261	0.0249828	------------	34.8467	1.74554	0.371144	0.0143497	0.660722	------------	0.0735918	0.00106773	2.40475	0.0656364		5.30661	67.721	7.60754
JA021.csv	BZ2011	0.664987	0.0226217	0.398833	0.0108084	36.5519	1.46017	0.0805024	0.0011845	2.34665	0.0645659	28.9251	0.706923	#NUM!	#NUM!	-------------	2163.66	87.4725	3681.5	183.921	1564.95	52.2914	4656.2	48.1867	------------	2.50732	0.101366	0.664987	0.0226217	------------	36.5519	1.82607	0.398833	0.016124	0.711241	------------	0.0805024	0.0011845	2.34665	0.0645659		4.97782	59.8382	7.41351
JA022.csv	BZ2012	0.667552	0.0237261	0.399917	0.00949969	36.7926	1.42525	0.0812887	0.00138013	2.34859	0.0660711	28.4664	0.733342	#NUM!	#NUM!	-------------	2168.66	82.9851	3687.99	180.696	1579.66	54.4526	4661.76	50.2915	------------	2.50052	0.0956839	0.667552	0.0237261	------------	36.7926	1.80269	0.399917	0.0153031	0.66715	------------	0.0812887	0.00138013	2.34859	0.0660711		4.79592	57.2111	7.13743
JA023.csv	BZ2013	0.70234	0.0252802	0.392171	0.0088836	37.9602	1.45513	0.0823547	0.00142255	2.29524	0.0575592	27.8797	0.708586	#NUM!	#NUM!	-------------	2132.89	80.1787	3718.88	181.023	1599.57	55.3733	4734.87	50.7412	------------	2.54991	0.0958553	0.70234	0.0252802	------------	37.9602	1.84777	0.392171	0.0147423	0.652233	------------	0.0823547	0.00142255	2.29524	0.0575592		4.83792	55.2789	7.07679
JA024.csv	BZ2014	0.684493	0.0219539	0.328982	0.00779441	31.0347	1.12645	0.0725266	0.00109232	2.35772	0.0611073	32.689	0.88602	#NUM!	#NUM!	-------------	1833.45	70.0879	3520.15	165.763	1415.2	47.506	4697.86	45.386	------------	3.03968	0.116199	0.684493	0.0219539	------------	31.0347	1.46141	0.328982	0.0125761	0.70831	------------	0.0725266	0.00109232	2.35772	0.0611073		6.8208	75.3921	8.38061
JA025.csv	BZ2015	0.644559	0.0200317	0.328824	0.0080909	29.21	1.05818	0.0721881	0.00099925	2.38291	0.0593339	32.7644	0.804839	#NUM!	#NUM!	-------------	1832.68	71.1078	3460.6	162.773	1408.82	46.5468	4611.16	44.187	------------	3.04114	0.117996	0.644559	0.0200317	------------	29.21	1.37392	0.328824	0.0127583	0.726569	------------	0.0721881	0.00099925	2.38291	0.0593339		6.31917	70.9172	7.74799
JA026.csv	BZ2016	0.691244	0.023146	0.323653	0.00660097	30.8331	1.08276	0.0724765	0.000937582	2.38386	0.0575761	32.6957	0.835182	#NUM!	#NUM!	-------------	1807.55	65.5709	3513.74	162.287	1414.26	46.2043	4711.98	47.3162	------------	3.08973	0.112084	0.691244	0.023146	------------	30.8331	1.42407	0.323653	0.0117409	0.664871	------------	0.0724765	0.000937582	2.38386	0.0575761		6.40636	71.1606	7.86894
JA027.csv	BZ2017	0.662647	0.0219903	0.309922	0.00709334	28.3036	1.02956	0.068125	0.00088265	2.40342	0.0664524	35.1073	0.893358	#NUM!	#NUM!	-------------	1740.32	65.669	3429.67	161.711	1332.08	43.5301	4651.12	47.039	------------	3.22662	0.121752	0.662647	0.0219903	------------	28.3036	1.33453	0.309922	0.0116945	0.687328	------------	0.068125	0.00088265	2.40342	0.0664524		6.94057	79.2256	8.17911
JA028.csv	BZ2018	0.686848	0.0256022	0.376388	0.00937769	35.6289	1.43627	0.0828556	0.00126196	2.32141	0.0591238	28.2887	0.760437	#NUM!	#NUM!	-------------	2059.39	80.3097	3656.23	183.725	1608.93	54.1321	4702.8	52.5919	------------	2.65683	0.103608	0.686848	0.0256022	------------	35.6289	1.79035	0.376388	0.0146779	0.652278	------------	0.0828556	0.00126196	2.32141	0.0591238		5.41528	59.5332	7.59318
JA029.csv	BZ2019	0.662193	0.0202538	0.328229	0.00781763	29.9549	1.05511	0.0731754	0.0011481	2.42176	0.0699106	32.8681	0.973917	#NUM!	#NUM!	-------------	1829.79	70.0903	3485.33	161.257	1427.43	48.3257	4650.13	43.4152	------------	3.04666	0.116702	0.662193	0.0202538	------------	29.9549	1.38594	0.328229	0.0125728	0.725747	------------	0.0731754	0.0011481	2.42176	0.0699106		6.83691	76.6361	8.53254
JA030.csv	BZ2020	0.696756	0.0235242	0.330861	0.00780173	31.7711	1.17731	0.0730866	0.000987043	2.42358	0.0656698	33.5179	0.967287	#NUM!	#NUM!	-------------	1842.56	70.3079	3543.23	168.932	1425.75	46.9068	4723.4	47.6761	------------	3.02241	0.115329	0.696756	0.0235242	------------	31.7711	1.51477	0.330861	0.012625	0.684138	------------	0.0730866	0.000987043	2.42358	0.0656698		6.32867	71.5692	7.918
OLG_Normal_Model
JA100.csv	OLG001	0.121325	0.00197887	0.162217	0.00103092	2.71239	0.039441	0.0483348	0.000285151	2.25619	0.017194	46.7329	0.456946	#NUM!	#NUM!	------------	969.085	29.7177	1331.85	44.4017	954.077	29.1705	2002	31.1577	------------	6.16459	0.189042	0.121325	0.00197887	------------	2.71239	0.0904265	0.162217	0.0049745	0.824477	------------	0.0483348	0.000285151	2.25619	0.017194		142.551	1146.8	69.1285
JA101.csv	OLG002	0.127143	0.00209938	0.165047	0.00118507	2.89205	0.0435103	0.0490672	0.000267763	2.2469	0.0172279	45.6338	0.462942	#NUM!	#NUM!	------------	984.766	30.3774	1379.84	46.3089	968.193	29.5224	2091.21	30.1343	------------	6.05886	0.186899	0.127143	0.00209938	------------	2.89205	0.0970603	0.165047	0.00509127	0.823581	------------	0.0490672	0.000267763	2.2469	0.0172279		144.084	1154.52	71.0762
JA102.csv	OLG003	0.128841	0.00188696	0.167008	0.000996366	2.9655	0.0389713	0.0499044	0.000310458	2.259	0.0172538	45.3979	0.409928	#NUM!	#NUM!	------------	995.606	30.4531	1398.83	45.8145	984.317	30.1577	2115.69	26.155	------------	5.98773	0.183149	0.128841	0.00188696	------------	2.9655	0.0971265	0.167008	0.00510836	0.845375	------------	0.0499044	0.000310458	2.259	0.0172538		142.237	1147.87	71.2077
JA103.csv	OLG004	0.126643	0.00195233	0.168639	0.0014506	2.94338	0.0441955	0.0500507	0.000322523	2.23647	0.0198448	44.7432	0.516063	#NUM!	#NUM!	------------	1004.61	31.3527	1393.14	46.737	987.133	30.2895	2083.85	28.3438	------------	5.92981	0.185062	0.126643	0.00195233	------------	2.94338	0.098744	0.168639	0.00526304	0.841363	------------	0.0500507	0.000322523	2.23647	0.0198448		141.84	1140.41	71.0523
JA104.csv	OLG005	0.128789	0.00204855	0.172794	0.00127733	3.06701	0.0450156	0.0509097	0.000278552	2.24344	0.0152761	44.0247	0.425056	#NUM!	#NUM!	------------	1027.49	31.7466	1424.49	47.575	1003.66	30.6065	2114.95	28.3738	------------	5.78724	0.17881	0.128789	0.00204855	------------	3.06701	0.102432	0.172794	0.00533887	0.831984	------------	0.0509097	0.000278552	2.24344	0.0152761		141.773	1144.71	72.3269
JA105.csv	OLG006	0.134098	0.00217494	0.171856	0.00125454	3.17609	0.0471056	0.0513243	0.00028613	2.24521	0.0195418	43.8072	0.439536	#NUM!	#NUM!	------------	1022.33	31.5648	1451.36	48.5712	1011.63	30.8686	2185.28	25.3384	------------	5.81883	0.179659	0.134098	0.00217494	------------	3.17609	0.106291	0.171856	0.00530611	0.827565	------------	0.0513243	0.00028613	2.24521	0.0195418		142.232	1145.68	72.9007
JA109.csv	OLG007	0.13684	0.00195407	0.172168	0.001199	3.24691	0.0433176	0.0510894	0.000328298	2.26279	0.0167389	44.4723	0.443627	#NUM!	#NUM!	------------	1024.04	31.5382	1468.44	48.2128	1007.12	30.8989	2216.82	19.9307	------------	5.80829	0.178882	0.13684	0.00195407	------------	3.24691	0.106605	0.172168	0.00530237	0.851767	------------	0.0510894	0.000328298	2.26279	0.0167389		140.208	1142.23	72.2455
JA110.csv	OLG008	0.132304	0.00202125	0.169817	0.00119003	3.09641	0.0435125	0.0507514	0.000324181	2.26441	0.0168052	44.4606	0.450112	#NUM!	#NUM!	------------	1011.1	31.1496	1431.8	47.433	1000.62	30.6914	2162.72	25.3109	------------	5.88871	0.181417	0.132304	0.00202125	------------	3.09641	0.102578	0.169817	0.00523164	0.839304	------------	0.0507514	0.000324181	2.26441	0.0168052		143.726	1153.21	72.7953
JA111.csv	OLG009	0.134804	0.00199358	0.172976	0.00126318	3.21362	0.044588	0.0511008	0.000287353	2.26544	0.0147671	44.1632	0.466471	#NUM!	#NUM!	------------	1028.49	31.7556	1460.45	48.2723	1007.34	30.7464	2193.76	22.6014	------------	5.78114	0.178499	0.134804	0.00199358	------------	3.21362	0.10622	0.172976	0.00534082	0.846176	------------	0.0511008	0.000287353	2.26544	0.0147671		141.428	1146.53	72.8237
JA112.csv	OLG010	0.139169	0.00200971	0.170829	0.00117655	3.27648	0.0439936	0.050817	0.000325229	2.25166	0.0167123	44.1982	0.397044	#NUM!	#NUM!	------------	1016.68	31.2937	1475.48	48.4958	1001.88	30.7327	2240.3	17.3635	------------	5.85382	0.180183	0.139169	0.00200971	------------	3.27648	0.107691	0.170829	0.00525818	0.849665	------------	0.050817	0.000325229	2.25166	0.0167123		143.374	1157.73	73.2963
JA113.csv	OLG011	0.136112	0.00186527	0.174357	0.00124031	3.27072	0.0426915	0.0518235	0.000322036	2.26979	0.0154169	43.6501	0.454066	#NUM!	#NUM!	------------	1036.08	31.9441	1474.11	48.2279	1021.23	31.2872	2208.83	19.8762	------------	5.73534	0.176831	0.136112	0.00186527	------------	3.27072	0.107007	0.174357	0.00537577	0.859105	------------	0.0518235	0.000322036	2.26979	0.0154169		140.838	1141.83	73.6334
JA114.csv	OLG012	0.160154	0.00202243	0.181174	0.00103488	3.99891	0.0463662	0.0533344	0.000320589	2.24432	0.016366	42.2041	0.330847	#NUM!	#NUM!	------------	1073.39	32.7801	1633.97	52.553	1050.24	32.1335	2455.89	21.1628	------------	5.51955	0.168561	0.160154	0.00202243	------------	3.99891	0.128616	0.181174	0.00553287	0.86926	------------	0.0533344	0.000320589	2.24432	0.016366		144.3	1177.9	78.6968
JA119.csv	OLG013	0.160318	0.00193464	0.179087	0.00107042	3.9569	0.0449218	0.0534071	0.000300661	2.26145	0.0182063	42.3576	0.409291	#NUM!	#NUM!	------------	1061.99	32.4858	1625.4	52.1369	1051.64	32.0998	2457.62	20.2269	------------	5.58386	0.170808	0.160318	0.00193464	------------	3.9569	0.126922	0.179087	0.00547822	0.875961	------------	0.0534071	0.000300661	2.26145	0.0182063		145.357	1179.04	78.6827
JA120.csv	OLG014	0.160276	0.00240146	0.180434	0.00113252	3.98559	0.0539283	0.0542039	0.000256253	2.26437	0.0195832	41.7448	0.364125	#NUM!	#NUM!	------------	1069.34	32.7749	1631.26	53.6853	1066.92	32.4026	2457.17	25.074	------------	5.5422	0.169866	0.160276	0.00240146	------------	3.98559	0.131167	0.180434	0.00553022	0.841681	------------	0.0542039	0.000256253	2.26437	0.0195832		145.137	1174.15	79.4035
JA121.csv	OLG015	0.162832	0.00217826	0.18214	0.00128534	4.08744	0.0524069	0.0547374	0.000321559	2.27007	0.0207798	41.4077	0.455284	#NUM!	#NUM!	------------	1078.66	33.2429	1651.8	53.8899	1077.15	32.9281	2483.85	22.3564	------------	5.49028	0.169204	0.162832	0.00217826	------------	4.08744	0.133353	0.18214	0.00561334	0.862903	------------	0.0547374	0.000321559	2.27007	0.0207798		145.248	1175.45	80.1494
JA122.csv	OLG016	0.160505	0.00212652	0.182302	0.00118077	4.03261	0.0501093	0.0540724	0.000323402	2.24509	0.0198873	41.6089	0.403346	#NUM!	#NUM!	------------	1079.54	33.1324	1640.8	53.2793	1064.4	32.5603	2459.58	22.1889	------------	5.48539	0.168353	0.160505	0.00212652	------------	4.03261	0.130945	0.182302	0.00559509	0.863352	------------	0.0540724	0.000323402	2.24509	0.0198873		145.501	1183.01	79.6488
JA123.csv	OLG017	0.162727	0.00218366	0.178177	0.00111401	3.99593	0.0496695	0.0540701	0.000307549	2.27854	0.0177099	42.1917	0.410167	#NUM!	#NUM!	------------	1057.01	32.3915	1633.37	53.0406	1064.35	32.4995	2482.76	22.4276	------------	5.61241	0.17199	0.162727	0.00218366	------------	3.99593	0.12976	0.178177	0.00546015	0.860958	------------	0.0540701	0.000307549	2.27854	0.0177099		146.77	1188.08	79.6682
JA124.csv	OLG018	0.162219	0.00221145	0.180242	0.00128896	4.02962	0.0525879	0.0539711	0.000333134	2.26175	0.0183513	42.0029	0.397224	#NUM!	#NUM!	------------	1068.3	32.9469	1640.19	53.6599	1062.46	32.5414	2477.5	22.7917	------------	5.5481	0.171107	0.162219	0.00221145	------------	4.02962	0.131831	0.180242	0.00555876	0.860091	------------	0.0539711	0.000333134	2.26175	0.0183513		145.203	1178.11	79.0031
JA128.csv	OLG019	0.162378	0.00228876	0.180101	0.00116377	4.0304	0.052216	0.0533058	0.000253146	2.26144	0.0169563	42.2395	0.406992	#NUM!	#NUM!	------------	1067.53	32.7602	1640.35	53.6032	1049.69	31.8829	2479.14	23.556	------------	5.55245	0.170394	0.162378	0.00228876	------------	4.0304	0.131705	0.180101	0.00552694	0.853056	------------	0.0533058	0.000253146	2.26144	0.0169563		146.063	1185.92	78.9146
JA129.csv	OLG020	0.159894	0.00209271	0.187549	0.00112529	4.13289	0.0496218	0.0555742	0.000345191	2.25307	0.0172497	40.7606	0.410361	#NUM!	#NUM!	------------	1108.09	33.9009	1660.83	53.6671	1093.18	33.4909	2453.14	21.9334	------------	5.33193	0.163126	0.159894	0.00209271	------------	4.13289	0.133548	0.187549	0.00573791	0.864281	------------	0.0555742	0.000345191	2.25307	0.0172497		144.213	1167.92	80.7695
JA130.csv	OLG021	0.161113	0.00232681	0.181443	0.00122628	4.0288	0.0535538	0.0533779	0.0002897	2.25526	0.0157587	42.368	0.413828	#NUM!	#NUM!	------------	1074.85	33.0537	1640.03	53.8143	1051.08	32.0442	2465.96	24.1579	------------	5.51138	0.169485	0.161113	0.00232681	------------	4.0288	0.132197	0.181443	0.0055797	0.849203	------------	0.0533779	0.0002897	2.25526	0.0157587		146.338	1189.06	79.2909
JA131.csv	OLG022	0.129699	0.00198047	0.168921	0.00129022	3.01944	0.0431324	0.050206	0.000328647	2.25763	0.0196924	45.0222	0.479423	#NUM!	#NUM!	------------	1006.16	31.1478	1412.54	46.9351	990.124	30.4026	2127.73	26.8387	------------	5.91993	0.183264	0.129699	0.00198047	------------	3.01944	0.100328	0.168921	0.00522929	0.840558	------------	0.050206	0.000328647	2.25763	0.0196924		137.546	1105.85	68.7974
JA132.csv	OLG023	0.132228	0.00195564	0.167936	0.00113321	3.06037	0.0412347	0.0503469	0.000294861	2.27029	0.0188986	44.9911	0.450205	#NUM!	#NUM!	------------	1000.73	30.7719	1422.83	46.7923	992.834	30.3473	2161.74	24.5814	------------	5.95465	0.183103	0.132228	0.00195564	------------	3.06037	0.100646	0.167936	0.00516395	0.844662	------------	0.0503469	0.000294861	2.27029	0.0188986		139.615	1117.29	69.6074
JA133.csv	OLG024	0.133916	0.00203969	0.169908	0.0013572	3.13581	0.0451513	0.0502942	0.000345718	2.25955	0.0198713	44.8615	0.495418	#NUM!	#NUM!	------------	1011.6	31.4054	1441.52	47.9687	991.82	30.5257	2183.05	24.017	------------	5.88555	0.182718	0.133916	0.00203969	------------	3.13581	0.104349	0.169908	0.00527482	0.841729	------------	0.0502942	0.000345718	2.25955	0.0198713		139.4	1111.75	69.6461
JA138.csv	OLG025	0.135477	0.00202624	0.169141	0.00107948	3.15805	0.0421499	0.050343	0.00027136	2.26809	0.0196701	45.0648	0.405394	#NUM!	#NUM!	------------	1007.38	30.8976	1446.97	47.5112	992.76	30.2597	2201.62	22.2211	------------	5.91224	0.181336	0.135477	0.00202624	------------	3.15805	0.103695	0.169141	0.00518778	0.841618	------------	0.050343	0.00027136	2.26809	0.0196701		138.277	1106.48	69.0022
JA139.csv	OLG026	0.131983	0.00193431	0.16908	0.00119555	3.0755	0.0414685	0.0498059	0.000308301	2.26029	0.0195025	45.3564	0.450949	#NUM!	#NUM!	------------	1007.04	31.039	1426.61	46.9223	982.422	30.0935	2158.56	24.5237	------------	5.91438	0.182293	0.131983	0.00193431	------------	3.0755	0.101156	0.16908	0.00521138	0.846852	------------	0.0498059	0.000308301	2.26029	0.0195025		138.726	1118.02	68.849
JA140.csv	OLG027	0.130371	0.00201288	0.168645	0.00114542	3.03013	0.0420159	0.0494649	0.000337053	2.24415	0.0185129	45.321	0.47499	#NUM!	#NUM!	------------	1004.64	30.9019	1415.24	46.7729	975.854	30.0213	2136.99	26.7745	------------	5.92963	0.182391	0.130371	0.00201288	------------	3.03013	0.100144	0.168645	0.00518738	0.836148	------------	0.0494649	0.000337053	2.24415	0.0185129		139.206	1125.1	68.6962
JA141.csv	OLG028	0.131825	0.00207522	0.167967	0.00116406	3.05161	0.0431346	0.0505049	0.000368884	2.2646	0.0187804	44.9716	0.415133	#NUM!	#NUM!	------------	1000.9	30.8179	1420.64	47.1129	995.875	30.7489	2156.48	26.3852	------------	5.95354	0.18331	0.131825	0.00207522	------------	3.05161	0.101201	0.167967	0.00517173	0.832442	------------	0.0505049	0.000368884	2.2646	0.0187804		137.253	1101.17	68.1205
JA142.csv	OLG029	0.132471	0.00179523	0.166787	0.000960422	3.04502	0.0367328	0.0499971	0.000256782	2.26446	0.0174843	45.3439	0.387668	#NUM!	#NUM!	------------	994.385	30.3761	1418.98	45.8822	986.101	30.0134	2164.89	22.4404	------------	5.99566	0.183153	0.132471	0.00179523	------------	3.04502	0.0984593	0.166787	0.00509496	0.85803	------------	0.0499971	0.000256782	2.26446	0.0174843		137.805	1107.3	67.6838
JA143.csv	OLG030	0.134612	0.00193025	0.171653	0.0013846	3.18449	0.0439807	0.0509114	0.00035451	2.27191	0.0187823	44.5834	0.476666	#NUM!	#NUM!	------------	1021.21	31.7244	1453.4	48.0006	1003.69	30.9113	2191.48	22.1078	------------	5.82572	0.180979	0.134612	0.00193025	------------	3.18449	0.105172	0.171653	0.00533247	0.852935	------------	0.0509114	0.00035451	2.27191	0.0187823		140.551	1144.66	70.9785
OLG_Deep_Model
JA113.csv	OLG001	0.139423	0.00241622	0.16543	0.00135869	3.17873	0.0514671	0.0485903	0.000333745	2.29041	0.0225819	46.918	0.51168	#NUM!	#NUM!	-------------	986.883	30.696	1452.01	49.4994	959.004	29.5145	2242.65	20.0595	-------------	6.04485	0.188018	0.139423	0.00241622	-------------	3.17873	0.108364	0.16543	0.00514553	0.815429	-------------	0.0485903	0.00149543	2.29041	0.0225819		171.945	1397.03	85.2719
JA114.csv	OLG002	0.138019	0.00213509	0.17394	0.00134948	3.3086	0.0485501	0.0505113	0.000346467	2.25564	0.0189929	44.6347	0.520196	#NUM!	#NUM!	-------------	1033.78	32.0337	1483.08	49.5297	995.998	30.651	2229.13	20.0492	-------------	5.74912	0.178148	0.138019	0.00213509	-------------	3.3086	0.110496	0.17394	0.00538986	0.838867	-------------	0.0505113	0.00155444	2.25564	0.0189929		170.927	1390.6	88.1609
JA115.csv	OLG003	0.140075	0.00240393	0.173994	0.00127474	3.35892	0.0525331	0.0507423	0.000329067	2.25541	0.018884	44.7615	0.521074	#NUM!	#NUM!	-------------	1034.08	31.9341	1494.87	50.5746	1000.44	30.7065	2248.49	18.7798	-------------	5.74732	0.177487	0.140075	0.00240393	-------------	3.35892	0.113639	0.173994	0.00537322	0.815359	-------------	0.0507423	0.00155743	2.25541	0.018884		171.826	1407.23	89.4504
JA116.csv	OLG004	0.139426	0.00249896	0.175113	0.00133161	3.36487	0.054887	0.0519236	0.000362087	2.24832	0.0180007	43.2701	0.442168	#NUM!	#NUM!	-------------	1040.22	32.1936	1496.26	51.0939	1023.15	31.5129	2242.68	20.6611	-------------	5.7106	0.176736	0.139426	0.00249896	-------------	3.36487	0.114903	0.175113	0.00541953	0.805548	-------------	0.0519236	0.00159924	2.24832	0.0180007		167.618	1331.77	87.1933
JA117.csv	OLG005	0.136392	0.00239184	0.16546	0.00150612	3.11021	0.0522493	0.0483152	0.000451269	2.24437	0.0217955	46.0338	0.615308	#NUM!	#NUM!	-------------	987.051	30.9446	1435.22	49.3476	953.7	29.9656	2211.94	24.7165	-------------	6.04374	0.189475	0.136392	0.00239184	-------------	3.11021	0.10694	0.16546	0.00518727	0.815235	-------------	0.0483152	0.00151808	2.24437	0.0217955		171.787	1375.41	84.1921
JA118.csv	OLG006	0.138727	0.00259045	0.19783	0.00184777	3.78233	0.0669457	0.0588132	0.00055198	2.24304	0.0242024	38.2948	0.574338	#NUM!	#NUM!	-------------	1163.65	36.5625	1589	55.3483	1155.1	36.3092	2236.11	22.6468	-------------	5.05483	0.158825	0.138727	0.00259045	-------------	3.78233	0.131747	0.19783	0.0062159	0.800335	-------------	0.0588132	0.00184872	2.24304	0.0242024		129.191	1031.76	74.9301
JA119.csv	OLG007	0.135062	0.00261497	0.167128	0.00162333	3.1109	0.0571384	0.0492529	0.000428082	2.25804	0.0202193	45.9936	0.636142	#NUM!	#NUM!	-------------	996.267	31.4155	1435.39	50.4913	971.77	30.352	2196.8	28.8389	-------------	5.98344	0.188677	0.135062	0.00261497	-------------	3.1109	0.109429	0.167128	0.00527008	0.791928	-------------	0.0492529	0.00153835	2.25804	0.0202193		169.148	1365.2	84.407
JA120.csv	OLG008	0.142901	0.00246184	0.166255	0.00135606	3.2743	0.0526872	0.0485031	0.000325472	2.2621	0.0221329	46.4876	0.525127	#NUM!	#NUM!	-------------	991.446	30.8231	1474.97	50.2122	957.322	29.4293	2270.09	21.1442	-------------	6.01484	0.186996	0.142901	0.00246184	-------------	3.2743	0.111467	0.166255	0.00516872	0.816668	-------------	0.0485031	0.00149105	2.2621	0.0221329		173.313	1402.86	85.8237
JA126.csv	OLG009	0.140566	0.00221309	0.16799	0.00146416	3.2544	0.0500641	0.0483483	0.000319847	2.22972	0.0208413	46.1932	0.514247	#NUM!	#NUM!	-------------	1001.03	31.2725	1470.23	49.5677	954.339	29.318	2252.69	16.6037	-------------	5.95273	0.185966	0.140566	0.00221309	-------------	3.2544	0.10972	0.16799	0.00524808	0.837761	-------------	0.0483483	0.0014853	2.22972	0.0208413		170.322	1384.56	84.4512
JA127.csv	OLG010	0.142517	0.0025552	0.176048	0.0012474	3.45782	0.0556043	0.051769	0.000306691	2.26092	0.0186904	43.3962	0.478586	#NUM!	#NUM!	-------------	1045.35	32.2232	1517.65	51.6579	1020.18	31.1965	2267.52	20.2739	-------------	5.68028	0.175097	0.142517	0.0025552	-------------	3.45782	0.117697	0.176048	0.00542674	0.80408	-------------	0.051769	0.00158306	2.26092	0.0186904		180.461	1448.13	94.7291
JA128.csv	OLG011	0.134392	0.00232103	0.160756	0.00144611	2.97748	0.0493112	0.0473009	0.000340437	2.25344	0.0243007	47.6308	0.637205	#NUM!	#NUM!	-------------	960.978	30.0975	1401.89	48.0395	934.133	28.8192	2188.85	26.6061	-------------	6.2206	0.194827	0.134392	0.00232103	-------------	2.97748	0.102031	0.160756	0.00503483	0.818505	-------------	0.0473009	0.00145929	2.25344	0.0243007		174.575	1398.54	83.1588
JA129.csv	OLG012	0.12893	0.00244879	0.159847	0.00139991	2.84031	0.0500533	0.0469266	0.00037693	2.25741	0.0225712	47.698	0.562689	#NUM!	#NUM!	-------------	955.929	29.8749	1366.25	47.536	926.908	28.7867	2116.94	33.6334	-------------	6.25596	0.195513	0.12893	0.00244879	-------------	2.84031	0.0988228	0.159847	0.00499558	0.793902	-------------	0.0469266	0.00145738	2.25741	0.0225712		173.1	1385.55	81.8282
JA130.csv	OLG013	0.123904	0.00259049	0.159735	0.00121398	2.72767	0.0503788	0.0472005	0.000329214	2.25861	0.0201444	48.1108	0.538975	#NUM!	#NUM!	-------------	955.306	29.5645	1336.02	47.0676	932.196	28.7118	2042.45	39.2035	-------------	6.26035	0.193743	0.123904	0.00259049	-------------	2.72767	0.0960946	0.159735	0.00494344	0.762087	-------------	0.0472005	0.00145378	2.25861	0.0201444		170.369	1369.24	80.8931
JA131.csv	OLG014	0.127462	0.00208158	0.159709	0.00133329	2.80555	0.0436967	0.0468842	0.000278786	2.27884	0.0206698	48.3813	0.559467	#NUM!	#NUM!	-------------	955.159	29.7436	1357.02	45.8701	926.091	28.3232	2095.88	29.688	-------------	6.26139	0.194979	0.127462	0.00208158	-------------	2.80555	0.0948335	0.159709	0.00497332	0.829178	-------------	0.0468842	0.00143389	2.27884	0.0206698		170.991	1386.99	81.3708
JA132.csv	OLG015	0.139631	0.00287431	0.170551	0.00137017	3.28203	0.0604499	0.0502445	0.000313743	2.26277	0.019184	45.1521	0.459122	#NUM!	#NUM!	-------------	1015.15	31.5275	1476.8	51.9876	990.864	30.363	2244.55	22.9001	-------------	5.86335	0.182098	0.139631	0.00287431	-------------	3.28203	0.115537	0.170551	0.00529682	0.768335	-------------	0.0502445	0.00153964	2.26277	0.019184		168.953	1365.98	86.1213
JA133.csv	OLG016	0.146722	0.00268355	0.169468	0.00141535	3.42679	0.0580142	0.0500329	0.000354534	2.26822	0.017149	45.1975	0.507162	#NUM!	#NUM!	-------------	1009.18	31.4267	1510.56	52.0346	986.791	30.4183	2307.13	30.9241	-------------	5.90082	0.183757	0.146722	0.00268355	-------------	3.42679	0.118043	0.169468	0.00527737	0.80256	-------------	0.0500329	0.00154229	2.26822	0.017149		171.831	1386.3	87.4768
JA134.csv	OLG017	0.13988	0.00247523	0.163907	0.00136818	3.1598	0.0521764	0.0478512	0.000376007	2.27042	0.0207574	47.0868	0.582345	#NUM!	#NUM!	-------------	978.454	30.4687	1447.4	49.5649	944.752	29.2987	2246.77	19.6386	-------------	6.10101	0.189983	0.13988	0.00247523	-------------	3.1598	0.108205	0.163907	0.00510401	0.810809	-------------	0.0478512	0.00148396	2.27042	0.0207574		171.392	1393.37	84.1309
JA135.csv	OLG018	0.142195	0.00266697	0.167765	0.00133145	3.2877	0.0560867	0.0490997	0.0003493	2.27087	0.0215927	46.1771	0.491023	#NUM!	#NUM!	-------------	999.783	31.0253	1478.14	51.0126	968.82	29.8706	2265.29	20.0366	-------------	5.96073	0.184974	0.142195	0.00266697	-------------	3.2877	0.113463	0.167765	0.00520608	0.79473	-------------	0.0490997	0.00151384	2.27087	0.0215927		172.04	1391.44	85.9799
JA141.csv	OLG019	0.141985	0.00251512	0.171398	0.00131414	3.35393	0.0543088	0.0505428	0.000323493	2.28174	0.0196791	45.1772	0.486285	#NUM!	#NUM!	-------------	1019.81	31.5776	1493.71	50.9221	996.605	30.571	2263.78	17.2632	-------------	5.83438	0.180657	0.141985	0.00251512	-------------	3.35393	0.114339	0.171398	0.0053072	0.808637	-------------	0.0505428	0.00155041	2.28174	0.0196791		168.276	1365.83	86.4095
JA142.csv	OLG020	0.134886	0.00248587	0.1808	0.00139155	3.36101	0.0561818	0.0540461	0.000401013	2.28653	0.0262494	42.2148	0.527179	#NUM!	#NUM!	-------------	1071.34	33.1812	1495.36	51.3545	1063.89	32.8785	2194.73	27.7414	-------------	5.53098	0.171303	0.134886	0.00248587	-------------	3.36101	0.115426	0.1808	0.00559965	0.798673	-------------	0.0540461	0.00167024	2.28653	0.0262494		131.931	1061.8	71.4598
OLG_Improved_Deep_Model
JA096.csv	OLG001	0.139046	0.00204914	0.167625	0.00118321	3.21222	0.0443859	0.048109	0.000307324	2.28038	0.0229028	46.8025	0.520873	#NUM!	#NUM!	-------------	999.014	30.7888	1460.11	48.2264	949.725	29.1305	2239.15	17.854	------------	5.96569	0.183858	0.139046	0.00204914	------------	3.21222	0.106097	0.167625	0.00516608	0.846602	------------	0.048109	0.000307324	2.28038	0.0229028		181.855	1460.57	90.9896
JA097.csv	OLG002	0.137412	0.00231558	0.161312	0.00124113	3.05492	0.0477667	0.0471259	0.000450651	2.27203	0.0248144	48.0469	0.653508	#NUM!	#NUM!	-------------	964.067	29.858	1421.47	48.0885	930.757	29.307	2222.9	22.5223	------------	6.19915	0.191993	0.137412	0.00231558	------------	3.05492	0.103349	0.161312	0.00499599	0.820668	------------	0.0471259	0.000450651	2.27203	0.0248144		182.745	1457.35	88.8534
JA098.csv	OLG003	0.129751	0.002251	0.156415	0.00122151	2.79703	0.0449454	0.0455091	0.000309787	2.27593	0.0221658	50.0063	0.575871	#NUM!	#NUM!	-------------	936.824	29.0414	1354.74	46.1053	899.523	27.6717	2128.45	30.3515	------------	6.39324	0.198189	0.129751	0.002251	------------	2.79703	0.09519	0.156415	0.00484884	0.814325	------------	0.0455091	0.000309787	2.27593	0.0221658		187.771	1505.33	88.2434
JA099.csv	OLG004	0.129769	0.00256316	0.160129	0.00135805	2.86383	0.0519193	0.047427	0.000333717	2.2975	0.0230313	48.7856	0.61009	#NUM!	#NUM!	-------------	957.491	29.8505	1372.45	48.1077	936.567	28.8595	2128.7	34.3951	------------	6.24498	0.194692	0.129769	0.00256316	------------	2.86383	0.100384	0.160129	0.00499213	0.782619	------------	0.047427	0.000333717	2.2975	0.0230313		184.477	1480.28	89.9232
JA100.csv	OLG005	0.134815	0.00287095	0.159425	0.00121506	2.96211	0.0560316	0.0456804	0.000359727	2.2539	0.0244626	49.0344	0.58837	#NUM!	#NUM!	-------------	953.582	29.5162	1397.96	49.5795	902.836	28.0027	2193.89	31.8404	------------	6.27253	0.194154	0.134815	0.00287095	------------	2.96211	0.105053	0.159425	0.00493469	0.757175	------------	0.0456804	0.000359727	2.2539	0.0244626		182.404	1472.07	87.4894
JA101.csv	OLG006	0.138375	0.00239342	0.155447	0.0011063	2.96446	0.0468005	0.0459993	0.00034134	2.28197	0.022837	49.5634	0.496361	#NUM!	#NUM!	-------------	931.423	28.7182	1398.56	47.4116	908.999	28.0918	2232.68	21.6837	------------	6.43307	0.198348	0.138375	0.00239342	------------	2.96446	0.100496	0.155447	0.00479283	0.813553	------------	0.0459993	0.00034134	2.28197	0.022837		182.979	1459.84	87.0307
JA102.csv	OLG007	0.135998	0.00255088	0.160298	0.00120684	3.00447	0.0512716	0.0469038	0.000353034	2.27939	0.0212572	48.4307	0.440556	#NUM!	#NUM!	-------------	958.433	29.6446	1408.75	48.6218	926.469	28.6555	2207.55	26.8301	------------	6.23838	0.192955	0.135998	0.00255088	------------	3.00447	0.103696	0.160298	0.00495806	0.794399	------------	0.0469038	0.000353034	2.27939	0.0212572		185.214	1482.35	90.0268
JA103.csv	OLG008	0.140755	0.00260419	0.159933	0.00110497	3.10246	0.051628	0.0462856	0.000299412	2.27904	0.0227754	49.0038	0.598306	#NUM!	#NUM!	-------------	956.404	29.4432	1433.3	49.1713	914.53	28.0665	2254.25	18.72	------------	6.25262	0.192489	0.140755	0.00260419	------------	3.10246	0.106434	0.159933	0.00492358	0.796468	------------	0.0462856	0.000299412	2.27904	0.0227754		181.356	1468.51	88.2634
JA104.csv	OLG009	0.143328	0.00272053	0.161939	0.00130985	3.19883	0.0561111	0.046963	0.000283528	2.26	0.0231352	48.2156	0.519864	#NUM!	#NUM!	-------------	967.545	30.0629	1456.88	50.6292	927.612	28.3863	2272.78	26.4976	------------	6.17515	0.19187	0.143328	0.00272053	------------	3.19883	0.111165	0.161939	0.00503166	0.793137	------------	0.046963	0.000283528	2.26	0.0231352		179.333	1450.73	88.6341
JA105.csv	OLG010	0.142135	0.00227383	0.159913	0.0013368	3.1325	0.0488032	0.0468738	0.00036429	2.27428	0.0233493	48.3043	0.571806	#NUM!	#NUM!	-------------	956.293	29.7818	1440.71	48.7021	925.889	28.6936	2264.86	15.1016	------------	6.2534	0.194749	0.142135	0.00227383	------------	3.1325	0.105892	0.159913	0.00498016	0.83432	------------	0.0468738	0.00036429	2.27428	0.0233493		182.415	1460.2	89.3424
JA111.csv	OLG011	0.158991	0.0030684	0.181332	0.00156593	3.97331	0.0716343	0.0527027	0.00052092	2.27223	0.0219369	43.0463	0.664576	#NUM!	#NUM!	-------------	1074.25	33.5361	1628.76	57.0076	1038.12	32.7903	2443.58	32.255	------------	5.51474	0.17216	0.158991	0.0030684	------------	3.97331	0.139068	0.181332	0.00566086	0.790348	------------	0.0527027	0.00052092	2.27223	0.0219369		167.417	1349.77	92.7282
JA112.csv	OLG012	0.161933	0.00246524	0.168125	0.00130419	3.75209	0.0550906	0.0491488	0.000349709	2.29194	0.0205202	46.4019	0.459007	#NUM!	#NUM!	-------------	1001.77	31.0416	1582.56	52.858	969.765	29.9001	2474.52	25.4359	------------	5.94796	0.184308	0.161933	0.00246524	------------	3.75209	0.125321	0.168125	0.00520964	0.842536	------------	0.0491488	0.000349709	2.29194	0.0205202		186.321	1506.63	96.6642
JA113.csv	OLG013	0.164372	0.0025486	0.175477	0.00124026	3.97516	0.0577003	0.0510883	0.000306228	2.26704	0.0188236	44.4364	0.436805	#NUM!	#NUM!	-------------	1042.22	32.1225	1629.14	54.2944	1007.1	30.8101	2499.69	25.846	------------	5.69875	0.175643	0.164372	0.0025486	------------	3.97516	0.13248	0.175477	0.00540844	0.837358	------------	0.0510883	0.000306228	2.26704	0.0188236		187.32	1503.42	100.466
JA114.csv	OLG014	0.16358	0.00265658	0.172659	0.00144669	3.89246	0.0610561	0.050503	0.000306965	2.27397	0.0230857	45.1841	0.501939	#NUM!	#NUM!	-------------	1026.74	31.9811	1612.12	54.5754	995.838	30.4822	2491.56	27.0793	------------	5.79177	0.180403	0.16358	0.00265658	------------	3.89246	0.131772	0.172659	0.005378	0.830991	------------	0.050503	0.000306965	2.27397	0.0230857		183.383	1474.96	97.1627
JA115.csv	OLG015	0.166548	0.00229069	0.176297	0.00137403	4.04659	0.0552624	0.0509206	0.000361622	2.25095	0.0220257	44.5602	0.470198	#NUM!	#NUM!	-------------	1046.71	32.4437	1643.61	54.177	1003.87	30.9484	2521.78	22.9063	------------	5.67225	0.175816	0.166548	0.00229069	------------	4.04659	0.133384	0.176297	0.00546447	0.860376	------------	0.0509206	0.000361622	2.25095	0.0220257		186.988	1515.7	100.602
JA116.csv	OLG016	0.163584	0.00264428	0.170863	0.0013756	3.85207	0.0594301	0.049454	0.00036561	2.26057	0.0194614	45.6899	0.49704	#NUM!	#NUM!	-------------	1016.86	31.5853	1603.7	54.1003	975.645	30.145	2491.6	26.9542	------------	5.85264	0.181792	0.163584	0.00264428	------------	3.85207	0.129948	0.170863	0.00530726	0.831011	------------	0.049454	0.00036561	2.26057	0.0194614		180.932	1453.04	93.9029
JA117.csv	OLG017	0.162698	0.0022835	0.176902	0.00141678	3.96664	0.0552983	0.0505944	0.00034384	2.25559	0.0229099	44.4788	0.523972	#NUM!	#NUM!	-------------	1050.03	32.6041	1627.4	53.8358	997.596	30.6862	2482.46	23.4497	------------	5.65283	0.175524	0.162698	0.0022835	------------	3.96664	0.13122	0.176902	0.00549293	0.857443	------------	0.0505944	0.00034384	2.25559	0.0229099		185.526	1504.18	99.6748
JA118.csv	OLG018	0.164551	0.00277263	0.175582	0.00130239	3.98189	0.0619624	0.0511232	0.00038383	2.27013	0.0237418	44.3458	0.455554	#NUM!	#NUM!	-------------	1042.8	32.2259	1630.51	55.1042	1007.77	31.1654	2501.52	28.0617	------------	5.69533	0.176005	0.164551	0.00277263	------------	3.98189	0.13457	0.175582	0.00542609	0.820211	------------	0.0511232	0.00038383	2.27013	0.0237418		184.279	1475.89	98.3239
JA119.csv	OLG019	0.164359	0.00304538	0.176905	0.00140804	4.00718	0.068121	0.0506287	0.000342513	2.26448	0.0218274	44.6822	0.546546	#NUM!	#NUM!	-------------	1050.04	32.5911	1635.65	56.4002	998.256	30.6997	2499.55	30.8344	------------	5.65277	0.17545	0.164359	0.00304538	------------	4.00718	0.138174	0.176905	0.00549074	0.798429	------------	0.0506287	0.000342513	2.26448	0.0218274		181.588	1475	97.3071
JA120.csv	OLG020	0.162358	0.00258611	0.177476	0.00133165	3.97117	0.0592458	0.0509829	0.00031804	2.27826	0.0223292	44.8019	0.432461	#NUM!	#NUM!	-------------	1053.17	32.5684	1628.32	54.5568	1005.07	30.7971	2478.93	26.5926	------------	5.63456	0.174244	0.162358	0.00258611	------------	3.97117	0.133054	0.177476	0.00548829	0.83252	------------	0.0509829	0.00031804	2.27826	0.0223292		188.604	1530.22	101.316
DUR_Normal_Model
JA195.csv	DUR001	0.178077	0.0357696	0.00623877	0.000333139	0.153113	0.0252599	0.00165873	4.30583e-05	5.47859	0.596007	#NUM!	#NUM!	#NUM!	#NUM!	------------	40.0928	2.45562	144.657	24.2562	33.4989	1.32896	2633.58	300.217	------------	160.288	9.81737	0.178077	0.0357696	------------	0.153113	0.0256741	0.00623877	0.000382115	0.365268	------------	0.00165873	4.30583e-05	5.47859	0.596007		21.7	375.214	0.648295
JA196.csv	DUR002	0.204346	0.0368382	0.00584242	0.000296063	0.164537	0.0244784	0.00172282	4.24817e-05	5.29408	0.464363	2813.5	227.763	#NUM!	#NUM!	------------	37.5531	2.21147	154.667	23.4732	34.7921	1.35109	2860.01	266.876	------------	171.162	10.0796	0.204346	0.0368382	------------	0.164537	0.0249711	0.00584242	0.000344055	0.341142	------------	0.00172282	4.24817e-05	5.29408	0.464363		21.5595	377.358	0.662934
JA197.csv	DUR003	0.160494	0.0378641	0.00560687	0.000326951	0.124018	0.0237924	0.00169238	4.43674e-05	5.55709	0.510141	2983.88	275.746	#NUM!	#NUM!	------------	36.0432	2.36361	118.708	23.0505	34.1779	1.36167	2459.47	351.99	------------	178.353	11.6959	0.160494	0.0378641	------------	0.124018	0.0240816	0.00560687	0.000367682	0.337717	------------	0.00169238	4.43674e-05	5.55709	0.510141		21.5377	373.595	0.634419
JA198.csv	DUR004	0.174154	0.0357325	0.00592419	0.00027695	0.142189	0.023525	0.00172772	4.02313e-05	5.17651	0.408725	2845.52	231.523	#NUM!	#NUM!	------------	38.0771	2.11507	134.992	22.6984	34.8909	1.32504	2596.49	307.012	------------	168.8	9.3763	0.174154	0.0357325	------------	0.142189	0.0239086	0.00592419	0.000329071	0.330349	------------	0.00172772	4.02313e-05	5.17651	0.408725		21.718	376.204	0.661996
JA199.csv	DUR005	0.27509	0.0499025	0.00552022	0.000279534	0.209284	0.0311774	0.00168718	3.81466e-05	5.5715	0.451975	2982.16	243.692	#NUM!	#NUM!	------------	35.4878	2.08873	192.952	29.3214	34.0729	1.27998	3334.5	258.417	------------	181.152	10.6622	0.27509	0.0499025	------------	0.209284	0.0318033	0.00552022	0.000324907	0.360617	------------	0.00168718	3.81466e-05	5.5715	0.451975		21.6485	378.929	0.650034
JA200.csv	DUR006	0.180831	0.0421289	0.00654386	0.000329925	0.163085	0.0304304	0.00169309	3.68159e-05	5.13063	0.523155	#NUM!	#NUM!	#NUM!	#NUM!	------------	42.047	2.46681	153.4	28.9908	34.1921	1.26688	2659.07	342.081	------------	152.815	8.96533	0.180831	0.0421289	------------	0.163085	0.0308212	0.00654386	0.000383915	0.310431	------------	0.00169309	3.68159e-05	5.13063	0.523155		21.3519	369.38	0.648315
JA204.csv	DUR007	0.181781	0.0437182	0.00590478	0.000299116	0.147931	0.0284602	0.00168957	4.4579e-05	5.30736	0.428804	2910.08	236.191	#NUM!	#NUM!	------------	37.9527	2.23441	140.083	27.2761	34.1212	1.36321	2667.75	351.601	------------	169.354	9.97049	0.181781	0.0437182	------------	0.147931	0.0288041	0.00590478	0.000347635	0.30236	------------	0.00168957	4.4579e-05	5.30736	0.428804		21.4536	371.51	0.642413
JA205.csv	DUR008	0.149372	0.0388649	0.00578685	0.000306872	0.119129	0.0247496	0.00165737	4.4119e-05	5.64107	0.551702	2934.35	258.974	#NUM!	#NUM!	------------	37.1969	2.26629	114.282	23.9889	33.4714	1.34246	2337.68	387.764	------------	172.806	10.5285	0.149372	0.0388649	------------	0.119129	0.0250063	0.00578685	0.000352575	0.290254	------------	0.00165737	4.4119e-05	5.64107	0.551702		21.4422	374.982	0.634263
JA206.csv	DUR009	0.164041	0.0367101	0.00622035	0.000327965	0.140628	0.0254116	0.00162143	4.26498e-05	5.39464	0.585712	#NUM!	#NUM!	#NUM!	#NUM!	------------	39.9747	2.42495	133.603	24.4726	32.7461	1.30652	2496.3	334.764	------------	160.763	9.75218	0.164041	0.0367101	------------	0.140628	0.0257594	0.00622035	0.000377338	0.331172	------------	0.00162143	4.26498e-05	5.39464	0.585712		21.4448	377.236	0.641573
JA207.csv	DUR010	0.164818	0.0365053	0.00587791	0.000291115	0.133516	0.0237862	0.00170079	4.05633e-05	5.2127	0.417531	2842.11	235.606	#NUM!	#NUM!	------------	37.7805	2.18766	127.253	22.9894	34.3476	1.31637	2504.25	331.463	------------	170.129	9.85119	0.164818	0.0365053	------------	0.133516	0.024121	0.00587791	0.000340357	0.320516	------------	0.00170079	4.05633e-05	5.2127	0.417531		21.2085	366.507	0.646263
JA208.csv	DUR011	0.19644	0.0411269	0.00543041	0.000315211	0.147017	0.0252749	0.00169426	4.32057e-05	6.12137	0.651607	#NUM!	#NUM!	#NUM!	#NUM!	------------	34.912	2.28114	139.275	24.3057	34.2158	1.34721	2795.55	307.259	------------	184.148	12.0322	0.19644	0.0411269	------------	0.147017	0.0256569	0.00543041	0.000354822	0.374406	------------	0.00169426	4.32057e-05	6.12137	0.651607		21.5462	374.337	0.64339
JA209.csv	DUR012	0.148999	0.0410012	0.00593221	0.000343573	0.121816	0.0268628	0.00165705	4.72525e-05	5.01974	0.374387	2970.04	270.106	#NUM!	#NUM!	------------	38.1285	2.48694	116.717	25.9755	33.4649	1.38513	2333.41	407.389	------------	168.571	10.9951	0.148999	0.0410012	------------	0.121816	0.0271103	0.00593221	0.00038693	0.29308	------------	0.00165705	4.72525e-05	5.01974	0.374387		21.5753	375.819	0.638113
JA214.csv	DUR013	0.184203	0.0407207	0.00551842	0.000297348	0.140093	0.0251418	0.00167592	4.19249e-05	5.75606	0.667197	#NUM!	#NUM!	#NUM!	#NUM!	------------	35.4762	2.18787	133.127	24.2231	33.8457	1.32206	2689.66	325.583	------------	181.211	11.1755	0.184203	0.0407207	------------	0.140093	0.0254906	0.00551842	0.000340328	0.338937	------------	0.00167592	4.19249e-05	5.75606	0.667197		21.7846	376.558	0.640947
JA215.csv	DUR014	0.205484	0.041187	0.00571419	0.000282532	0.161822	0.0263733	0.00169279	3.46853e-05	5.58543	0.49837	3073.7	282.826	#NUM!	#NUM!	------------	36.7312	2.12429	152.297	25.2379	34.1861	1.24197	2869.06	293.587	------------	175.003	10.121	0.205484	0.041187	------------	0.161822	0.0268164	0.00571419	0.000330471	0.348994	------------	0.00169279	3.46853e-05	5.58543	0.49837		21.3006	365.674	0.635612
JA216.csv	DUR015	0.147275	0.0306205	0.00648306	0.000293971	0.131587	0.0220317	0.0017421	3.87827e-05	4.6647	0.325914	2683.83	198.79	#NUM!	#NUM!	------------	41.6576	2.26493	125.523	21.3511	35.1811	1.31429	2313.55	318.333	------------	154.248	8.38651	0.147275	0.0306205	------------	0.131587	0.0223826	0.00648306	0.000352485	0.319642	------------	0.0017421	3.87827e-05	4.6647	0.325914		21.0705	367.054	0.653903
JA217.csv	DUR016	0.155856	0.0335037	0.00612374	0.000305052	0.131536	0.0228888	0.00164114	3.78362e-05	4.80362	0.36487	2722	220.275	#NUM!	#NUM!	------------	39.3558	2.28856	125.477	22.1566	33.1439	1.25402	2409.88	325.358	------------	163.299	9.49593	0.155856	0.0335037	------------	0.131536	0.0232265	0.00612374	0.000356099	0.329318	------------	0.00164114	3.78362e-05	4.80362	0.36487		21.3004	370.848	0.631155
JA218.csv	DUR017	0.207791	0.037541	0.00602195	0.00028503	0.172453	0.0255187	0.00165383	3.72207e-05	6.05688	0.468324	3368.18	259.459	#NUM!	#NUM!	------------	38.7035	2.16889	161.545	24.391	33.4001	1.25262	2887.21	266.786	------------	166.059	9.30571	0.207791	0.037541	------------	0.172453	0.0260379	0.00602195	0.000337461	0.371151	------------	0.00165383	3.72207e-05	6.05688	0.468324		21.2473	432.764	0.723521
JA219.csv	DUR018	0.183815	0.0375718	0.00608583	0.00027788	0.154173	0.0254602	0.0016411	3.72495e-05	5.73131	0.440169	3316.02	248.306	#NUM!	#NUM!	------------	39.1129	2.13688	145.59	24.4363	33.143	1.24681	2686.18	303.57	------------	164.316	8.97719	0.183815	0.0375718	------------	0.154173	0.0258769	0.00608583	0.000332492	0.325503	------------	0.0016411	3.72495e-05	5.73131	0.440169		20.1905	433.489	0.709957
JA223.csv	DUR019	0.263726	0.0551428	0.00592539	0.000309352	0.215365	0.0367066	0.00168585	3.39341e-05	6.76095	0.843121	#NUM!	#NUM!	#NUM!	#NUM!	------------	38.0848	2.29322	198.045	34.2735	34.0461	1.22999	3268.29	295.386	------------	168.765	10.1619	0.263726	0.0551428	------------	0.215365	0.0372709	0.00592539	0.000356788	0.347936	------------	0.00168585	3.39341e-05	6.76095	0.843121		21.3437	432.79	0.737359
JA224.csv	DUR020	0.258022	0.0463011	0.0060562	0.00031874	0.215359	0.0320491	0.00173312	3.73266e-05	6.53817	0.675658	#NUM!	#NUM!	#NUM!	#NUM!	------------	38.923	2.35796	198.04	30.0646	34.9999	1.29256	3233.84	257.807	------------	165.12	10.003	0.258022	0.0463011	------------	0.215359	0.0326938	0.0060562	0.000366886	0.303611	------------	0.00173312	3.73266e-05	6.53817	0.675658		21.0454	426.915	0.731535
JA225.csv	DUR021	0.305221	0.0603344	0.00563465	0.000306176	0.237021	0.0385488	0.00166953	3.73156e-05	6.63156	0.670146	#NUM!	#NUM!	#NUM!	#NUM!	------------	36.2213	2.24824	215.978	35.719	33.7169	1.26137	3496.2	276.214	------------	177.473	11.0157	0.305221	0.0603344	------------	0.237021	0.0391991	0.00563465	0.00034974	0.375309	------------	0.00166953	3.73156e-05	6.63156	0.670146		21.1753	430.272	0.717346
JA226.csv	DUR022	0.280282	0.0674058	0.00676746	0.000472301	0.261412	0.0520405	0.00175172	4.93735e-05	5.76285	0.602331	#NUM!	#NUM!	#NUM!	#NUM!	------------	43.4789	3.30287	235.804	47.4727	35.3752	1.45617	3363.74	332.467	------------	147.766	11.225	0.280282	0.0674058	------------	0.261412	0.0526281	0.00676746	0.000514089	0.377329	------------	0.00175172	4.93735e-05	5.76285	0.602331		18.8762	386.433	0.675307
JA227.csv	DUR023	0.229347	0.047558	0.0065742	0.000362876	0.207798	0.0353095	0.00164173	4.21613e-05	6.00239	0.589104	3452.78	386.122	#NUM!	#NUM!	------------	42.2413	2.65372	191.703	33.0784	33.1558	1.30935	3046.5	298.29	------------	152.11	9.55596	0.229347	0.047558	------------	0.207798	0.0358555	0.0065742	0.00041301	0.364085	------------	0.00164173	4.21613e-05	6.00239	0.589104		17.2916	377.189	0.632016
JA228.csv	DUR024	0.267773	0.0618059	0.00650843	0.000382034	0.240187	0.0452066	0.00167411	4.1825e-05	6.68003	0.789259	#NUM!	#NUM!	#NUM!	#NUM!	------------	41.8201	2.75679	218.573	41.6579	33.8093	1.31993	3292.23	322.19	------------	153.647	10.1285	0.267773	0.0618059	------------	0.240187	0.0457772	0.00650843	0.000429038	0.345874	------------	0.00167411	4.1825e-05	6.68003	0.789259		17.2236	375.852	0.636199
JA233.csv	DUR025	0.257744	0.0541339	0.00631808	0.000323462	0.224429	0.0382946	0.00170391	4.30008e-05	6.66174	0.839014	#NUM!	#NUM!	#NUM!	#NUM!	------------	40.6008	2.40919	205.59	35.618	34.4105	1.349	3232.14	297.388	------------	158.276	9.39186	0.257744	0.0541339	------------	0.224429	0.038882	0.00631808	0.000374905	0.342506	------------	0.00170391	4.30008e-05	6.66174	0.839014		17.1231	375.157	0.635886
JA234.csv	DUR026	0.315964	0.0564572	0.00577963	0.00033487	0.251677	0.0377883	0.00166775	4.27532e-05	7.43179	1.01531	#NUM!	#NUM!	#NUM!	#NUM!	------------	37.1506	2.42392	227.938	34.9004	33.6809	1.32908	3549.59	251.025	------------	173.022	11.2889	0.315964	0.0564572	------------	0.251677	0.0385353	0.00577963	0.000377096	0.216541	------------	0.00166775	4.27532e-05	7.43179	1.01531		17.1619	373.572	0.617084
JA235.csv	DUR027	0.252292	0.0565179	0.00602012	0.000401964	0.209321	0.0389554	0.00178826	4.57207e-05	7.60175	0.847551	#NUM!	#NUM!	#NUM!	#NUM!	------------	38.6918	2.83224	192.983	36.3784	36.1125	1.42344	3198.35	315.917	------------	166.11	12.1592	0.252292	0.0565179	------------	0.209321	0.0394583	0.00602012	0.000440673	0.340311	------------	0.00178826	4.57207e-05	7.60175	0.847551		16.9597	377.713	0.6533
JA236.csv	DUR028	0.267462	0.065838	0.00622912	0.00028825	0.229612	0.0451106	0.00172951	4.08064e-05	6.1378	0.460826	3326.59	249.662	#NUM!	#NUM!	------------	40.0309	2.20764	209.878	41.7116	34.9271	1.33305	3290.41	341.22	------------	160.536	8.85332	0.267462	0.065838	------------	0.229612	0.0456335	0.00622912	0.000343526	0.277487	------------	0.00172951	4.08064e-05	6.1378	0.460826		17.057	379.15	0.808839
JA237.csv	DUR029	0.175812	0.0295682	0.00568879	0.000276398	0.13784	0.0191932	0.00169524	3.56903e-05	5.95965	0.410607	3457.56	273.977	#NUM!	#NUM!	------------	36.5684	2.08813	131.118	18.6761	34.2357	1.25474	2612.29	255.944	------------	175.784	10.0376	0.175812	0.0295682	------------	0.13784	0.0196336	0.00568879	0.000324841	0.297266	------------	0.00169524	3.56903e-05	5.95965	0.410607		20.7326	424.87	0.708121
JA238.csv	DUR030	0.182794	0.044854	0.0062888	0.000307904	0.158429	0.0311533	0.00168822	4.14118e-05	6.35744	0.533091	#NUM!	#NUM!	#NUM!	#NUM!	------------	40.4132	2.32056	149.327	29.7033	34.094	1.32121	2676.96	357.623	------------	159.013	9.13066	0.182794	0.044854	------------	0.158429	0.0315138	0.0062888	0.000361108	0.288671	------------	0.00168822	4.14118e-05	6.35744	0.533091		17.4551	376.911	0.627795
DUR_Deep_Model
JA036.csv	DUR001	0.328328	0.0671172	0.00628958	0.000499162	0.284601	0.0520033	0.00176027	5.9609e-05	7.5754	1.07339	3584.02	437.423	#NUM!	#NUM!	-------------	40.4183	3.42925	254.3	47.0889	35.5477	1.60821	3608.59	282.58	-------------	158.993	13.4896	0.328328	0.0671172	-------------	0.284601	0.0526996	0.00628958	0.000533634	0.0127748	-------------	0.00176027	7.96362e-05	7.5754	1.07339		19.4729	440.97	0.798603
JA037.csv	DUR002	0.239016	0.0647503	0.00715225	0.000400859	0.2356	0.0530578	0.00174875	6.49833e-05	5.96898	0.688623	3134.3	346.551	#NUM!	#NUM!	-------------	45.9423	2.92058	214.811	48.8034	35.3152	1.68659	3112.5	376.309	-------------	139.816	8.88819	0.239016	0.0647503	-------------	0.2356	0.0535265	0.00715225	0.000454672	0.27981	-------------	0.00174875	8.35172e-05	5.96898	0.688623		19.7356	444.32	0.80107
JA038.csv	DUR003	0.211443	0.0617664	0.00685182	0.000566381	0.199666	0.0497771	0.00171924	4.67419e-05	6.43648	0.821187	3523.56	507.387	#NUM!	#NUM!	-------------	44.019	3.8709	184.844	46.4142	34.7197	1.40569	2915.49	408.268	-------------	145.947	12.8341	0.211443	0.0617664	-------------	0.199666	0.0501362	0.00685182	0.000602529	0.331715	-------------	0.00171924	6.9606e-05	6.43648	0.821187		20.6484	457.637	0.827836
JA039.csv	DUR004	0.184435	0.0405364	0.00638814	0.00039425	0.162377	0.0304316	0.0017229	5.37778e-05	5.71915	0.484271	3292.06	301.398	#NUM!	#NUM!	-------------	41.0496	2.81687	152.782	28.9979	34.7937	1.50633	2691.75	323.841	-------------	156.54	10.7419	0.184435	0.0405364	-------------	0.162377	0.030819	0.00638814	0.000438361	0.294584	-------------	0.0017229	7.45896e-05	5.71915	0.484271		24.421	508.027	0.910387
JA040.csv	DUR005	0.24394	0.0784737	0.00664583	0.000497105	0.223428	0.0602349	0.00174341	5.15272e-05	6.87654	1.0493	#NUM!	#NUM!	#NUM!	#NUM!	-------------	42.7	3.44125	204.759	55.5425	35.2076	1.4827	3144.96	435.722	-------------	150.47	12.1266	0.24394	0.0784737	-------------	0.223428	0.0606067	0.00664583	0.000535596	0.297102	-------------	0.00174341	7.34206e-05	6.87654	1.0493		19.9619	447.676	0.799764
JA041.csv	DUR006	0.122979	0.0456864	0.00611996	0.000398694	0.103725	0.0317527	0.00163082	5.04586e-05	5.29634	0.5733	2914.8	306.499	#NUM!	#NUM!	-------------	39.3316	2.82094	100.209	30.8233	32.9357	1.41942	2028.09	514.878	-------------	163.4	11.7194	0.122979	0.0456864	-------------	0.103725	0.0319048	0.00611996	0.000438937	0.233175	-------------	0.00163082	7.02829e-05	5.29634	0.5733		28.3192	517.149	0.893666
JA042.csv	DUR007	0.14365	0.0362976	0.00611138	0.000356784	0.120991	0.0256083	0.00174808	5.18617e-05	5.21661	0.474701	2798.98	249.899	#NUM!	#NUM!	-------------	39.2766	2.57801	115.97	24.7909	35.3018	1.48946	2274.7	376.242	-------------	163.629	10.7402	0.14365	0.0362976	-------------	0.120991	0.0258643	0.00611138	0.000401135	0.307046	-------------	0.00174808	7.37553e-05	5.21661	0.474701		27.9765	503.346	0.920832
JA043.csv	DUR008	0.258367	0.0781274	0.00600103	0.000396554	0.213682	0.0539069	0.00174886	5.55023e-05	6.45771	0.915161	#NUM!	#NUM!	#NUM!	#NUM!	-------------	38.5695	2.79907	196.638	49.9566	35.3176	1.54236	3235.95	410.282	-------------	166.638	12.0933	0.258367	0.0781274	-------------	0.213682	0.0542867	0.00600103	0.000435507	0.285657	-------------	0.00174886	7.63752e-05	6.45771	0.915161		28.505	515.449	0.941506
JA044.csv	DUR009	0.159296	0.0441205	0.00578345	0.000412227	0.126969	0.0297256	0.00165193	4.79535e-05	5.72558	0.680889	3017.64	350.365	#NUM!	#NUM!	-------------	37.1751	2.87486	121.37	28.6472	33.3616	1.39269	2446.81	405.765	-------------	172.907	13.3714	0.159296	0.0441205	-------------	0.126969	0.0299686	0.00578345	0.000447252	0.327639	-------------	0.00165193	6.89603e-05	5.72558	0.680889		28.253	507.887	0.876982
JA045.csv	DUR010	0.220349	0.0623937	0.00629205	0.000362278	0.191077	0.0449303	0.0017355	5.76471e-05	5.68058	0.662764	3177.59	375.135	#NUM!	#NUM!	-------------	40.4341	2.62514	177.548	42.0874	35.048	1.5687	2982.18	395.205	-------------	158.931	10.3184	0.220349	0.0623937	-------------	0.191077	0.0452945	0.00629205	0.000408505	0.273885	-------------	0.0017355	7.76786e-05	5.68058	0.662764		27.8197	516.674	0.926417
JA051.csv	DUR011	0.203333	0.0491555	0.0061266	0.000396278	0.171685	0.0352142	0.00178091	5.27701e-05	5.95698	0.645673	3179.86	374.712	#NUM!	#NUM!	-------------	39.3741	2.80738	160.88	33.3491	35.9641	1.51647	2851.91	347.67	-------------	163.223	11.6378	0.203333	0.0491555	-------------	0.171685	0.0355889	0.0061266	0.000436827	0.34396	-------------	0.00178091	7.50943e-05	5.95698	0.645673		23.0766	432.876	0.811406
JA052.csv	DUR012	0.224183	0.0555654	0.00610392	0.00041886	0.188589	0.039798	0.00171543	5.61883e-05	5.56013	0.566316	3318.39	390.775	#NUM!	#NUM!	-------------	39.2288	2.93795	175.425	37.3921	34.6429	1.53873	3009.95	350.815	-------------	163.829	12.2696	0.224183	0.0555654	-------------	0.188589	0.0401981	0.00610392	0.000457139	0.328581	-------------	0.00171543	7.61941e-05	5.56013	0.566316		22.6288	430.582	0.759068
JA053.csv	DUR013	0.185278	0.0525466	0.00683397	0.000407594	0.174503	0.041184	0.00174654	4.92469e-05	5.31749	0.513163	2996.03	332.61	#NUM!	#NUM!	-------------	43.9047	2.93118	163.319	38.8548	35.2706	1.45213	2699.28	405.249	-------------	146.328	9.76919	0.185278	0.0525466	-------------	0.174503	0.0415154	0.00683397	0.000456251	0.280623	-------------	0.00174654	7.19069e-05	5.31749	0.513163		21.4023	409.338	0.748078
JA054.csv	DUR014	0.319439	0.0594575	0.00594363	0.000387093	0.261665	0.0427568	0.0017559	5.6726e-05	6.38201	0.772383	#NUM!	#NUM!	#NUM!	#NUM!	-------------	38.2017	2.73924	236.008	39.2089	35.4596	1.56331	3566.43	260.264	-------------	168.247	12.0641	0.319439	0.0594575	-------------	0.261665	0.0434714	0.00594363	0.000426186	0.0840634	-------------	0.0017559	7.74126e-05	6.38201	0.772383		22.5276	429.552	0.798167
JA055.csv	DUR015	0.35632	0.0771983	0.00654617	0.000509436	0.321465	0.0614032	0.00172734	5.07682e-05	6.70769	1.06006	#NUM!	#NUM!	#NUM!	#NUM!	-------------	42.0618	3.50813	283.029	54.7242	34.8832	1.46503	3733.55	295.393	-------------	152.761	12.7409	0.35632	0.0771983	-------------	0.321465	0.062156	0.00654617	0.000545978	0.0836458	-------------	0.00172734	7.25447e-05	6.70769	1.06006		22.5619	422.944	0.79356
JA056.csv	DUR016	0.182007	0.044488	0.0058214	0.000385852	0.146024	0.0303237	0.00170588	5.88138e-05	5.28099	0.505686	2854.55	263.77	#NUM!	#NUM!	-------------	37.4184	2.72236	138.395	29.0379	34.4503	1.57445	2669.82	356.618	-------------	171.78	12.4978	0.182007	0.044488	-------------	0.146024	0.0306385	0.0058214	0.000423534	0.344848	-------------	0.00170588	7.79621e-05	5.28099	0.505686		26.3019	448.045	0.823556
JA057.csv	DUR017	0.145967	0.0424941	0.00590433	0.00038373	0.118777	0.0288911	0.00177617	5.14563e-05	5.58199	0.552768	2984.56	299.267	#NUM!	#NUM!	-------------	37.9498	2.71649	113.962	27.9301	35.8685	1.49589	2298.32	429.085	-------------	169.367	12.1235	0.145967	0.0424941	-------------	0.118777	0.02911	0.00590433	0.000422639	0.29207	-------------	0.00177617	7.40746e-05	5.58199	0.552768		25.3385	450.92	0.832769
JA058.csv	DUR018	0.21607	0.0425096	0.00649953	0.000455551	0.193545	0.0335255	0.00166392	5.76648e-05	5.10783	0.513884	2853.17	306.035	#NUM!	#NUM!	-------------	41.7631	3.18403	179.65	31.5818	33.6035	1.54029	2950.53	286.713	-------------	153.857	11.7301	0.21607	0.0425096	-------------	0.193545	0.0340246	0.00649953	0.000495526	0.0779499	-------------	0.00166392	7.62691e-05	5.10783	0.513884		24.6514	442.925	0.788157
JA059.csv	DUR019	0.236947	0.0594731	0.00535741	0.000399095	0.174949	0.037681	0.00169812	4.83143e-05	6.40721	0.709245	3367.31	378.908	#NUM!	#NUM!	-------------	34.4439	2.76612	163.705	35.5996	34.2938	1.41791	3098.64	352.244	-------------	186.657	14.9901	0.236947	0.0594731	-------------	0.174949	0.0380447	0.00535741	0.000430243	0.268004	-------------	0.00169812	7.02106e-05	6.40721	0.709245		24.0359	453.252	0.805493
JA060.csv	DUR020	0.175324	0.0442174	0.00616819	0.000376004	0.149041	0.0315987	0.00162115	5.07791e-05	4.92007	0.422607	2885.35	262.596	#NUM!	#NUM!	-------------	39.6406	2.69321	141.064	30.2055	32.7405	1.42002	2607.66	368.602	-------------	162.122	11.0147	0.175324	0.0442174	-------------	0.149041	0.0319134	0.00616819	0.000419071	0.317293	-------------	0.00162115	7.03123e-05	4.92007	0.422607		24.6464	450.46	0.776804
DUR_Improved_Deep_Model
JA036.csv	DUR001	0.271181	0.0614745	0.00578332	0.000459846	0.216144	0.0448649	0.00165042	5.99549e-05	5.90293	0.815099	#NUM!	#NUM!	#NUM!	#NUM!	-------------	37.1743	3.15921	198.695	41.6717	33.3311	1.57034	3312.08	316.582	------------	172.911	14.6946	0.271181	0.0614745	------------	0.216144	0.0453311	0.00578332	0.000491488	0.00790035	------------	0.00165042	5.99549e-05	5.90293	0.815099		21.5623	399.463	0.739531
JA037.csv	DUR002	0.216903	0.0580086	0.00612702	0.000474285	0.183156	0.0438028	0.00163005	6.06392e-05	5.64626	0.664049	3142.71	353.453	#NUM!	#NUM!	-------------	39.3768	3.26901	170.772	41.1614	32.92	1.57326	2956.75	376.741	------------	163.211	13.5496	0.216903	0.0580086	------------	0.183156	0.0441461	0.00612702	0.000508658	0.165835	------------	0.00163005	6.06392e-05	5.64626	0.664049		21.919	414.966	0.770268
JA038.csv	DUR003	0.195271	0.0496277	0.00584282	0.000413253	0.157241	0.0356057	0.00159124	5.45234e-05	4.90896	0.498815	2950.87	280.12	#NUM!	#NUM!	-------------	37.5556	2.88532	148.285	33.8711	32.137	1.46358	2785.77	365.427	------------	171.15	13.1491	0.195271	0.0496277	------------	0.157241	0.0359168	0.00584282	0.000448891	0.18843	------------	0.00159124	5.45234e-05	4.90896	0.498815		28.2621	485.041	0.871469
JA039.csv	DUR004	0.248606	0.0523081	0.00604788	0.000452155	0.207214	0.0400342	0.00167858	4.70315e-05	5.34896	0.584794	3015.55	314.279	#NUM!	#NUM!	-------------	38.8697	3.13123	191.212	37.3853	33.8993	1.39154	3175.04	299.171	------------	165.347	13.3199	0.248606	0.0523081	------------	0.207214	0.0405139	0.00604788	0.000487199	0.0109745	------------	0.00167858	4.70315e-05	5.34896	0.584794		27.4711	488.532	0.926805
JA040.csv	DUR005	0.321455	0.0869159	0.00660225	0.000464748	0.292495	0.070078	0.00169393	4.88909e-05	5.64542	0.702943	#NUM!	#NUM!	#NUM!	#NUM!	-------------	42.4209	3.24599	260.521	62.9049	34.2091	1.42412	3576.1	363.409	------------	151.464	11.5898	0.321455	0.0869159	------------	0.292495	0.0706252	0.00660225	0.000505194	0.244906	------------	0.00169393	4.88909e-05	5.64542	0.702943		25.4193	473.164	0.920216
JA041.csv	DUR006	0.310958	0.12079	0.00629673	0.000482592	0.26985	0.0911913	0.00170115	5.99032e-05	6.79336	1.12576	#NUM!	#NUM!	#NUM!	#NUM!	-------------	40.4641	3.33035	242.574	82.2962	34.3549	1.58925	3524.97	497.869	------------	158.813	13.0709	0.310958	0.12079	------------	0.26985	0.09155	0.00629673	0.000518246	0.242597	------------	0.00170115	5.99032e-05	6.79336	1.12576		21.8545	417.534	0.793706
JA042.csv	DUR007	0.233424	0.0439756	0.00579679	0.000373237	0.186483	0.0321074	0.00167232	5.22168e-05	5.39697	0.491782	2857.46	224.107	#NUM!	#NUM!	-------------	37.2606	2.64673	173.624	30.3438	33.7731	1.4624	3074.71	272.873	------------	172.509	12.2538	0.233424	0.0439756	------------	0.186483	0.0325912	0.00579679	0.000411762	0.000115056	------------	0.00167232	5.22168e-05	5.39697	0.491782		31.5831	563.344	1.06646
JA043.csv	DUR008	0.185625	0.0392707	0.0055332	0.000340999	0.141553	0.0268484	0.00163749	4.89268e-05	5.68341	0.563003	3059.16	254.562	#NUM!	#NUM!	-------------	35.571	2.4381	134.426	25.8136	33.0702	1.40023	2702.38	312.671	------------	180.727	12.3874	0.185625	0.0392707	------------	0.141553	0.0271822	0.0055332	0.000379255	0.124775	------------	0.00163749	4.89268e-05	5.68341	0.563003		31.7906	557.538	1.01138
JA044.csv	DUR009	0.144331	0.0304167	0.00581352	0.000365802	0.115639	0.0219138	0.00168043	5.48333e-05	5.33808	0.486084	2908.5	228.128	#NUM!	#NUM!	-------------	37.3679	2.60485	111.111	21.3179	33.9367	1.50426	2279.04	323.135	------------	172.013	11.9907	0.144331	0.0304167	------------	0.115639	0.0221867	0.00581352	0.000405251	0.106269	------------	0.00168043	5.48333e-05	5.33808	0.486084		31.1815	544.125	1.02726
JA045.csv	DUR010	0.16048	0.0370512	0.00550291	0.000385017	0.121708	0.0253173	0.00159867	4.6965e-05	5.72478	0.573308	3223.33	319.03	#NUM!	#NUM!	-------------	35.3768	2.69311	116.619	24.5097	32.2869	1.35568	2459.32	345.302	------------	181.722	13.8338	0.16048	0.0370512	------------	0.121708	0.0255792	0.00550291	0.000418917	0.107456	------------	0.00159867	4.6965e-05	5.72478	0.573308		31.2765	551.013	0.988508
JA051.csv	DUR011	0.185505	0.0578855	0.00616789	0.000446836	0.157688	0.0431487	0.00164494	4.61144e-05	6.33875	0.712157	3597.33	390.555	#NUM!	#NUM!	-------------	39.6387	3.10813	148.678	40.9269	33.2206	1.36403	2701.31	440.063	------------	162.13	12.7128	0.185505	0.0578855	------------	0.157688	0.0434073	0.00616789	0.000483634	0.28485	------------	0.00164494	4.61144e-05	6.33875	0.712157		21.5209	475.272	0.828077
JA052.csv	DUR012	0.203336	0.0807032	0.00614487	0.000541104	0.1722	0.0596809	0.00163422	4.83797e-05	8.15602	1.59528	#NUM!	#NUM!	#NUM!	#NUM!	-------------	39.4912	3.67378	161.327	56.1214	33.0043	1.39105	2851.94	532.582	------------	162.737	15.1391	0.203336	0.0807032	------------	0.1722	0.0599041	0.00614487	0.000571644	0.267418	------------	0.00163422	4.83797e-05	8.15602	1.59528		21.878	490.2	0.853162
JA053.csv	DUR013	0.266319	0.0593676	0.00642515	0.000471399	0.235826	0.0475998	0.00165114	5.22976e-05	6.17992	0.647437	3479.83	341.92	#NUM!	#NUM!	-------------	41.2867	3.27256	214.996	43.8723	33.3457	1.45474	3283.68	312.517	------------	155.638	12.3366	0.266319	0.0593676	------------	0.235826	0.0481227	0.00642515	0.000509285	0.0577894	------------	0.00165114	5.22976e-05	6.17992	0.647437		21.2575	474.703	0.85346
JA054.csv	DUR014	0.279609	0.067869	0.00595865	0.000489868	0.229617	0.0506075	0.00162041	5.46465e-05	5.93251	0.779653	3361.94	419.827	#NUM!	#NUM!	-------------	38.2979	3.3516	209.883	46.6846	32.7255	1.47712	3359.98	335.302	------------	167.823	14.6869	0.279609	0.067869	------------	0.229617	0.0510742	0.00595865	0.000521465	0.0483526	------------	0.00162041	5.46465e-05	5.93251	0.779653		22.5993	426.312	0.768397
JA055.csv	DUR015	0.257685	0.0544078	0.005989	0.000422826	0.212691	0.0406611	0.00163842	5.08174e-05	5.53676	0.602626	#NUM!	#NUM!	#NUM!	#NUM!	-------------	38.4924	2.95275	195.808	37.8917	33.0891	1.42782	3231.78	298.812	------------	166.973	12.8085	0.257685	0.0544078	------------	0.212691	0.0411587	0.005989	0.000459416	0.0454147	------------	0.00163842	5.08174e-05	5.53676	0.602626		21.9502	409.93	0.738857
JA056.csv	DUR016	0.173538	0.0404872	0.00578416	0.000373649	0.138338	0.0285577	0.00158839	5.81283e-05	5.21898	0.507362	2971.69	236.871	#NUM!	#NUM!	-------------	37.1797	2.64812	131.562	27.4443	32.0794	1.51802	2590.59	344.566	------------	172.886	12.3138	0.173538	0.0404872	------------	0.138338	0.0288577	0.00578416	0.000411977	0.199985	------------	0.00158839	5.81283e-05	5.21898	0.507362		26.9989	501.497	0.864355
JA057.csv	DUR017	0.234484	0.0635382	0.00554557	0.000392026	0.179211	0.0426832	0.00153856	5.13791e-05	6.61977	0.781847	#NUM!	#NUM!	#NUM!	#NUM!	-------------	35.6503	2.73773	167.382	40.1808	31.0737	1.39493	3081.95	377.29	------------	180.324	13.8478	0.234484	0.0635382	------------	0.179211	0.0430205	0.00554557	0.000425867	0.271266	------------	0.00153856	5.13791e-05	6.61977	0.781847		22.0476	459.675	0.76136
JA058.csv	DUR018	0.250177	0.0722505	0.00535694	0.000473966	0.184701	0.0476094	0.00161578	5.81858e-05	7.72351	1.45415	#NUM!	#NUM!	#NUM!	#NUM!	-------------	34.4409	3.21763	172.098	44.6602	32.6321	1.52947	3185.02	395.726	------------	186.674	17.4399	0.250177	0.0722505	------------	0.184701	0.0479308	0.00535694	0.00050047	0.153298	------------	0.00161578	5.81858e-05	7.72351	1.45415		23.8413	464.295	0.802056
JA059.csv	DUR019	0.158342	0.0445504	0.00558139	0.000405805	0.121799	0.0300284	0.00167525	5.97252e-05	5.84675	0.562469	3347.8	340.5	#NUM!	#NUM!	-------------	35.8799	2.82206	116.702	28.9839	33.8322	1.57639	2436.67	411.71	------------	179.167	14.092	0.158342	0.0445504	------------	0.121799	0.0302499	0.00558139	0.000438992	0.291616	------------	0.00167525	5.97252e-05	5.84675	0.562469		21.4645	400.855	0.723543
JA060.csv	DUR020	0.105604	0.0432247	0.00564114	0.00040122	0.0821016	0.0287027	0.0017103	6.05426e-05	5.96907	0.587759	3238.58	327.008	#NUM!	#NUM!	-------------	36.263	2.79921	80.1189	28.1125	34.5395	1.60267	1732.95	598.513	------------	177.269	13.6837	0.105604	0.0432247	------------	0.0821016	0.0288082	0.00564114	0.000435451	0.219992	------------	0.0017103	6.05426e-05	5.96907	0.587759		20.7809	395.557	0.715568
MK1_Normal_Model
JA242.csv	MK1001	0.331211	0.0194819	0.00553962	0.000127976	0.252867	0.0128869	0.00751914	0.000195894	0.90172	0.0415874	122.758	5.12316	#NUM!	#NUM!	------------	35.6122	1.34843	228.902	13.5367	151.41	6.01603	3622	87.3251	------------	180.518	6.83516	0.331211	0.0194819	------------	0.252867	0.0149539	0.00553962	0.000209753	0.306171	------------	0.00751914	0.000195894	0.90172	0.0415874		198.327	140.748	2.0757
JA243.csv	MK1002	0.337173	0.0247877	0.00542484	0.000139708	0.252085	0.0156838	0.00734367	0.000258045	0.910198	0.070145	#NUM!	#NUM!	#NUM!	#NUM!	------------	34.8762	1.37893	228.268	15.7669	147.89	6.83293	3649.31	108.107	------------	184.337	7.28829	0.337173	0.0247877	------------	0.252085	0.0174119	0.00542484	0.000214486	0.151874	------------	0.00734367	0.000258045	0.910198	0.070145		223.348	158.075	2.32524
JA244.csv	MK1003	0.346003	0.0127425	0.00563787	9.51313e-05	0.268844	0.00885851	0.00745115	0.00012452	0.902231	0.0286639	120.406	3.41901	#NUM!	#NUM!	------------	36.242	1.24744	241.769	10.7736	150.046	5.15267	3688.8	55.0655	------------	177.372	6.1051	0.346003	0.0127425	------------	0.268844	0.0119801	0.00563787	0.000194054	0.5588	------------	0.00745115	0.00012452	0.902231	0.0286639		277.281	200.931	3.01032
JA245.csv	MK1004	0.303766	0.0608682	0.00542817	0.000199903	0.227247	0.0358974	0.00722087	0.0002621	0.814683	0.125209	#NUM!	#NUM!	#NUM!	#NUM!	------------	34.8976	1.65763	207.924	33.432	145.425	6.84816	3488.81	279.777	------------	184.224	8.75059	0.303766	0.0608682	------------	0.227247	0.036539	0.00542817	0.000257837	0.295415	------------	0.00722087	0.0002621	0.814683	0.125209		185.152	134.173	1.8489
JA246.csv	MK1005	0.418308	0.013904	0.00681712	0.000118276	0.393009	0.0120951	0.0105524	0.000165523	1.05839	0.0277442	101.129	2.66052	#NUM!	#NUM!	------------	43.7969	1.51781	336.565	14.465	212.169	7.18263	3975.55	48.8863	------------	146.69	5.08363	0.418308	0.013904	------------	0.393009	0.0168909	0.00681712	0.000236252	0.618807	------------	0.0105524	0.000165523	1.05839	0.0277442		253.123	184.816	3.62617
JA247.csv	MK1006	0.326728	0.0126015	0.00511777	7.69021e-05	0.230448	0.00761359	0.00656875	0.000113028	0.860653	0.0238427	131.462	3.05928	#NUM!	#NUM!	------------	32.9071	1.10413	210.569	9.39693	132.335	4.57672	3601.1	57.9621	------------	195.398	6.55615	0.326728	0.0126015	------------	0.230448	0.0102841	0.00511777	0.000171716	0.510828	------------	0.00656875	0.000113028	0.860653	0.0238427		295.044	209.7	2.80308
JA252.csv	MK1007	0.348779	0.0119934	0.00535572	9.09944e-05	0.257439	0.00804735	0.00664917	0.000115375	0.874796	0.0261128	128.457	3.56249	#NUM!	#NUM!	------------	34.433	1.18715	232.601	10.0777	133.95	4.64225	3700.98	51.4409	------------	186.716	6.43742	0.348779	0.0119934	------------	0.257439	0.0111538	0.00535572	0.000184649	0.596938	------------	0.00664917	0.000115375	0.874796	0.0261128		294.171	213.034	2.91955
JA253.csv	MK1008	0.314405	0.0125999	0.00561312	9.95784e-05	0.24322	0.0086071	0.00684957	0.000106126	0.829602	0.0241582	121.985	3.51261	#NUM!	#NUM!	------------	36.0833	1.2576	221.054	10.2554	137.973	4.65862	3541.97	60.4284	------------	178.154	6.20917	0.314405	0.0125999	------------	0.24322	0.0112837	0.00561312	0.000195633	0.513629	------------	0.00684957	0.000106126	0.829602	0.0241582		271.179	195.691	2.7558
JA254.csv	MK1009	0.322428	0.0154606	0.00554515	9.04602e-05	0.246407	0.00989322	0.00703982	0.00014737	0.868164	0.0280354	123.575	3.67045	#NUM!	#NUM!	------------	35.6476	1.21732	223.653	11.2095	141.792	5.187	3580.75	71.8034	------------	180.338	6.15828	0.322428	0.0154606	------------	0.246407	0.0123499	0.00554515	0.000189359	0.373608	------------	0.00703982	0.00014737	0.868164	0.0280354		256.128	183.886	2.62996
JA255.csv	MK1010	0.440837	0.041863	0.00656646	0.000234424	0.398948	0.0323303	0.00971238	0.000404667	0.966549	0.0814462	#NUM!	#NUM!	#NUM!	#NUM!	------------	42.1917	1.96747	340.885	29.4571	195.362	10.0302	4053.91	134.653	------------	152.289	7.10148	0.440837	0.041863	------------	0.398948	0.0344745	0.00656646	0.000306205	0.0650146	------------	0.00971238	0.000404667	0.966549	0.0814462		174.51	128.265	2.49006
JA256.csv	MK1011	0.426902	0.0208923	0.00688392	0.000138938	0.405014	0.0172635	0.0103673	0.000192247	1.04366	0.0320601	101.433	3.54406	#NUM!	#NUM!	------------	44.2245	1.59904	345.278	17.997	208.468	7.35233	4005.97	71.2541	------------	145.266	5.25244	0.426902	0.0208923	------------	0.405014	0.0211107	0.00688392	0.000248904	0.405683	------------	0.0103673	0.000192247	1.04366	0.0320601		218.722	159.833	3.10397
JA257.csv	MK1012	0.323831	0.0397904	0.00546663	0.000157124	0.243974	0.0240721	0.0070732	0.000245646	0.926291	0.0754057	#NUM!	#NUM!	#NUM!	#NUM!	------------	35.1442	1.46012	221.669	22.86	142.462	6.53792	3587.42	176.945	------------	182.928	7.60006	0.323831	0.0397904	------------	0.243974	0.0251602	0.00546663	0.00022712	0.331045	------------	0.0070732	0.000245646	0.926291	0.0754057		221.653	158.962	2.24003
JA261.csv	MK1013	0.338858	0.0123578	0.00558048	8.22491e-05	0.260612	0.00822977	0.00708681	0.000125847	0.882444	0.0242725	123.178	2.97856	#NUM!	#NUM!	------------	35.8741	1.19909	235.16	10.2429	142.735	4.976	3656.93	54.6579	------------	179.196	5.98963	0.338858	0.0123578	------------	0.260612	0.0113515	0.00558048	0.000186527	0.544149	------------	0.00708681	0.000125847	0.882444	0.0242725		285.242	205.493	2.98727
JA262.csv	MK1014	0.320896	0.0120718	0.00553583	8.6917e-05	0.244824	0.00802302	0.00664305	0.000123213	0.820823	0.0243579	124.18	3.18198	#NUM!	#NUM!	------------	35.5879	1.20501	222.363	9.87929	133.827	4.72016	3573.43	56.6732	------------	180.641	6.11656	0.320896	0.0120718	------------	0.244824	0.0108772	0.00553583	0.000187445	0.533525	------------	0.00664305	0.000123213	0.820823	0.0243579		288.37	207.614	2.89299
JA263.csv	MK1015	0.383406	0.0130089	0.00610046	8.73508e-05	0.322349	0.00954085	0.0081624	0.000127395	0.992553	0.0281204	122.079	3.03482	#NUM!	#NUM!	------------	39.2066	1.3033	283.708	11.9563	164.311	5.5565	3844.56	50.2944	------------	163.922	5.44909	0.383406	0.0130089	------------	0.322349	0.0135848	0.00610046	0.000202791	0.581702	------------	0.0081624	0.000127395	0.992553	0.0281204		281.302	220.194	3.45593
JA264.csv	MK1016	0.380669	0.0129517	0.00617206	8.07421e-05	0.323806	0.00940593	0.00823234	0.000119322	0.972806	0.024298	118.657	2.66265	#NUM!	#NUM!	------------	39.6654	1.29818	284.826	11.894	165.713	5.5212	3833.75	50.4658	------------	162.02	5.30263	0.380669	0.0129517	------------	0.323806	0.0135217	0.00617206	0.000202001	0.569744	------------	0.00823234	0.000119322	0.972806	0.024298		281.68	216.91	3.44494
JA265.csv	MK1017	0.373122	0.0127631	0.00603806	8.96253e-05	0.310495	0.00930527	0.00800035	0.000113706	0.983408	0.0251466	123.439	2.95116	#NUM!	#NUM!	------------	38.8068	1.29891	274.564	11.6428	161.062	5.34666	3803.46	50.8311	------------	165.616	5.54338	0.373122	0.0127631	------------	0.310495	0.0131664	0.00603806	0.000202102	0.580696	------------	0.00800035	0.000113706	0.983408	0.0251466		284.147	220.867	3.41236
JA266.csv	MK1018	0.331431	0.0143443	0.00559413	8.78646e-05	0.255524	0.00931351	0.00698808	0.000124856	0.831352	0.0270857	118.806	3.12331	#NUM!	#NUM!	------------	35.9616	1.21776	231.053	10.9074	140.753	4.91475	3623.01	64.7804	------------	178.759	6.0533	0.331431	0.0143443	------------	0.255524	0.0120625	0.00559413	0.000189433	0.438533	------------	0.00698808	0.000124856	0.831352	0.0270857		285.097	199.086	2.89281
JA271.csv	MK1019	0.339792	0.0123273	0.0054071	8.15005e-05	0.253212	0.00797552	0.00676936	0.00012332	0.879338	0.0244057	127.987	3.06461	#NUM!	#NUM!	------------	34.7625	1.1671	229.182	9.96898	136.363	4.78607	3661.14	54.3628	------------	184.942	6.20918	0.339792	0.0123273	------------	0.253212	0.0110142	0.0054071	0.000181536	0.548865	------------	0.00676936	0.00012332	0.879338	0.0244057		272.211	199.423	2.76299
JA272.csv	MK1020	0.327871	0.0128489	0.00543956	8.41902e-05	0.245795	0.00828536	0.00669165	0.000120588	0.826532	0.0239492	125.364	3.12567	#NUM!	#NUM!	------------	34.9706	1.18051	223.155	10.0698	134.803	4.7176	3606.46	58.8529	------------	183.838	6.20587	0.327871	0.0128489	------------	0.245795	0.0110915	0.00543956	0.000183624	0.505493	------------	0.00669165	0.000120588	0.826532	0.0239492		289.131	206.376	2.88147
JA273.csv	MK1021	0.336732	0.011916	0.00533876	7.43644e-05	0.24776	0.00755001	0.00671581	0.00010286	0.860083	0.0233758	127.699	2.99388	#NUM!	#NUM!	------------	34.3243	1.13531	224.755	9.61102	135.288	4.55697	3647.31	53.1018	------------	187.309	6.19544	0.336732	0.011916	------------	0.24776	0.0105948	0.00533876	0.000176585	0.55514	------------	0.00671581	0.00010286	0.860083	0.0233758		288.311	206.209	2.88587
JA274.csv	MK1022	0.329504	0.0154394	0.00519297	8.45866e-05	0.235821	0.00931213	0.00664732	0.000119939	0.857621	0.0277691	127.903	3.66081	#NUM!	#NUM!	------------	33.3894	1.13981	214.992	10.6618	133.913	4.68801	3614.07	70.0437	------------	192.568	6.57366	0.329504	0.0154394	------------	0.235821	0.0116947	0.00519297	0.000177271	0.392552	------------	0.00664732	0.000119939	0.857621	0.0277691		267.223	186.637	2.57659
JA275.csv	MK1023	0.33185	0.0137467	0.00557981	9.59493e-05	0.255192	0.00924283	0.00739112	0.000143106	0.87216	0.025348	118.369	3.27796	#NUM!	#NUM!	------------	35.8698	1.24033	230.785	10.8538	148.842	5.31447	3624.95	62.0564	------------	179.218	6.19714	0.33185	0.0137467	------------	0.255192	0.0120017	0.00557981	0.000192943	0.489327	------------	0.00739112	0.000143106	0.87216	0.025348		266.189	184.629	2.79264
JA276.csv	MK1024	0.332109	0.0111755	0.00536265	8.71513e-05	0.245451	0.00751659	0.00660776	0.000102793	0.844261	0.0197996	126.314	3.05196	#NUM!	#NUM!	------------	34.4775	1.17634	222.875	9.55454	133.118	4.49854	3626.14	50.6162	------------	186.475	6.36236	0.332109	0.0111755	------------	0.245451	0.0105224	0.00536265	0.000182969	0.604912	------------	0.00660776	0.000102793	0.844261	0.0197996		282.795	202.107	2.81535
JA280.csv	MK1025	0.341636	0.0132771	0.00545523	7.32773e-05	0.256852	0.00841572	0.00694839	0.000122953	0.868522	0.0246869	124.354	2.87264	#NUM!	#NUM!	------------	35.0711	1.15278	232.127	10.3121	139.957	4.87468	3669.41	58.1224	------------	183.31	6.0254	0.341636	0.0132771	------------	0.256852	0.0114105	0.00545523	0.000179313	0.494307	------------	0.00694839	0.000122953	0.868522	0.0246869		283.226	202.542	2.91185
JA281.csv	MK1026	0.336089	0.0121947	0.00567664	0.000107828	0.262937	0.00886582	0.00834939	0.0001595	0.864203	0.0260608	104.265	3.2102	#NUM!	#NUM!	------------	36.4905	1.2957	237.031	10.6978	168.059	5.97717	3644.38	54.4328	------------	176.16	6.25509	0.336089	0.0121947	------------	0.262937	0.011867	0.00567664	0.000201566	0.586936	------------	0.00834939	0.0001595	0.864203	0.0260608		270.699	167.695	2.83028
JA282.csv	MK1027	0.355955	0.014031	0.00587707	0.000100878	0.288312	0.0100198	0.00761297	0.000120456	0.915144	0.023363	120.801	3.19236	#NUM!	#NUM!	------------	37.7751	1.30564	257.23	11.8096	153.292	5.19919	3731.99	58.6875	------------	170.153	5.88106	0.355955	0.014031	------------	0.288312	0.0132366	0.00587707	0.000203132	0.51948	------------	0.00761297	0.000120456	0.915144	0.023363		273.355	204.16	3.09165
JA283.csv	MK1028	0.346521	0.025153	0.00557831	0.000121328	0.266402	0.0158957	0.00693729	0.000145883	0.843525	0.0446154	#NUM!	#NUM!	#NUM!	#NUM!	------------	35.8602	1.32879	239.813	16.016	139.734	5.11933	3691.08	106.494	------------	179.266	6.64266	0.346521	0.025153	------------	0.266402	0.0177917	0.00557831	0.000206703	0.09383	------------	0.00693729	0.000145883	0.843525	0.0446154		234.838	169.514	2.38696
JA284.csv	MK1029	0.334904	0.0138203	0.00534472	8.19144e-05	0.24669	0.00865051	0.00687098	0.000120606	0.859766	0.0239381	124.871	3.09164	#NUM!	#NUM!	------------	34.3625	1.15761	223.884	10.3318	138.403	4.81059	3638.98	61.7652	------------	187.101	6.30308	0.334904	0.0138203	------------	0.24669	0.0113843	0.00534472	0.000180054	0.470082	------------	0.00687098	0.000120606	0.859766	0.0239381		283.122	199.711	2.79901
JA285.csv	MK1030	0.389041	0.0138792	0.00635849	9.73517e-05	0.340922	0.0106487	0.0102679	0.000158463	0.981921	0.0258731	95.2574	2.26473	#NUM!	#NUM!	------------	40.8597	1.3762	297.87	12.9003	206.479	6.96595	3866.58	52.759	------------	157.27	5.29702	0.389041	0.0138792	------------	0.340922	0.0147648	0.00635849	0.00021416	0.561229	------------	0.0102679	0.000158463	0.981921	0.0258731		272.099	173.577	3.46018
MK1_Deep_Model
JA160.csv	MK1_ref_DUR_BZ2_001	0.335199	0.0165335	0.00526194	0.00010944	0.243083	0.0108974	0.00656614	0.000121506	0.846221	0.0279326	127.739	3.96969	#NUM!	#NUM!	-------------	33.8317	1.23501	220.942	11.918	132.282	4.66272	3640.33	73.5037	-------------	190.044	6.93745	0.335199	0.0165335	-------------	0.243083	0.0131124	0.00526194	0.000192084	0.434051	-------------	0.00656614	0.000231444	0.846221	0.0279326		336.602	236.669	3.38146
JA161.csv	MK1_ref_DUR_BZ2_002	0.332724	0.0158846	0.0052204	0.000107543	0.239383	0.0104397	0.00663257	0.000154649	0.847643	0.0326141	127.033	3.75475	#NUM!	#NUM!	-------------	33.5653	1.22151	217.915	11.5349	133.616	5.07683	3628.98	71.259	-------------	191.556	6.97112	0.332724	0.0158846	-------------	0.239383	0.0126713	0.0052204	0.000189981	0.45347	-------------	0.00663257	0.000252008	0.847643	0.0326141		347.962	242.275	3.46731
JA162.csv	MK1_ref_DUR_BZ2_003	0.323143	0.0164509	0.00542698	0.000110297	0.24169	0.0110576	0.00674004	0.000162323	0.842399	0.0306331	123.739	3.67288	#NUM!	#NUM!	-------------	34.89	1.26428	219.803	12.0254	135.774	5.22335	3584.15	76.0959	-------------	184.265	6.67704	0.323143	0.0164509	-------------	0.24169	0.0132229	0.00542698	0.000196653	0.407192	-------------	0.00674004	0.000259295	0.842399	0.0306331		284.154	201.68	2.92799
JA163.csv	MK1_ref_DUR_BZ2_004	0.370629	0.0164197	0.00544346	0.000106919	0.278048	0.0113222	0.00741783	0.000157538	0.887338	0.0293853	118.711	3.39376	#NUM!	#NUM!	-------------	34.9956	1.25488	249.108	12.5994	149.378	5.4906	3793.31	65.5246	-------------	183.707	6.58736	0.370629	0.0164197	-------------	0.278048	0.0140631	0.00544346	0.000195192	0.491073	-------------	0.00741783	0.000272653	0.887338	0.0293853		332.319	224.33	3.54225
JA164.csv	MK1_ref_DUR_BZ2_005	0.327735	0.0153386	0.00502202	9.42287e-05	0.226834	0.00954864	0.00639042	0.000114003	0.870033	0.0267679	135.289	3.50653	#NUM!	#NUM!	-------------	32.293	1.14267	207.581	10.7302	128.754	4.49395	3605.82	70.004	-------------	199.123	7.04584	0.327735	0.0153386	-------------	0.226834	0.0117254	0.00502202	0.000177701	0.446578	-------------	0.00639042	0.000223048	0.870033	0.0267679		354.319	250.54	3.40159
JA165.csv	MK1_ref_DUR_BZ2_006	0.345284	0.0218316	0.00553233	0.00013292	0.263263	0.0148198	0.00696199	0.00022531	0.857814	0.0427474	121.551	4.07775	#NUM!	#NUM!	-------------	35.5654	1.36695	237.293	15.1364	140.23	6.18818	3685.62	93.2498	-------------	180.756	6.94734	0.345284	0.0218316	-------------	0.263263	0.0167929	0.00553233	0.000212635	0.295372	-------------	0.00696199	0.000307225	0.857814	0.0427474		222.935	157.71	2.37203
JA174.csv	MK1_ref_DUR_BZ2_007	0.3435	0.0200266	0.00546051	9.96956e-05	0.258503	0.01302	0.00698785	0.000151195	0.87825	0.0331158	126.268	3.61287	#NUM!	#NUM!	-------------	35.1049	1.23285	233.46	13.6865	140.749	5.20609	3677.72	86.2521	-------------	183.133	6.43144	0.3435	0.0200266	-------------	0.258503	0.0151546	0.00546051	0.000191767	0.284406	-------------	0.00698785	0.00025847	0.87825	0.0331158		269.744	195.479	2.88766
JA175.csv	MK1_ref_MRC_OLG_001	0.336401	0.0154523	0.00533852	0.000101827	0.247505	0.0102993	0.00668465	0.000159967	0.843397	0.0319921	125.279	3.68331	#NUM!	#NUM!	-------------	34.3228	1.22018	224.548	11.5191	134.662	5.16771	3645.81	68.5487	-------------	187.318	6.65919	0.336401	0.0154523	-------------	0.247505	0.0126968	0.00533852	0.000189786	0.462108	-------------	0.00668465	0.000256526	0.843397	0.0319921		337.564	236.422	3.43405
JA176.csv	MK1_ref_MRC_OLG_002	0.329425	0.0214203	0.00501146	0.000188762	0.227524	0.0146741	0.00607551	0.000236819	0.838093	0.0408848	138.634	6.91148	#NUM!	#NUM!	-------------	32.2253	1.55175	208.153	14.8061	122.428	6.0219	3613.71	96.2756	-------------	199.543	9.60863	0.329425	0.0214203	-------------	0.227524	0.016184	0.00501146	0.000241318	0.445277	-------------	0.00607551	0.000298838	0.838093	0.0408848		224.937	164.022	2.19311
JA177.csv	MK1_ref_MRC_OLG_003	0.302659	0.0266189	0.00588462	0.000213209	0.245458	0.0195246	0.00706785	0.000283888	0.85744	0.0611229	116.961	7.04527	#NUM!	#NUM!	-------------	37.8235	1.7792	222.88	18.9477	142.355	7.13666	3483.16	129.862	-------------	169.935	7.99366	0.302659	0.0266189	-------------	0.245458	0.0208671	0.00588462	0.00027681	0.200634	-------------	0.00706785	0.000354333	0.85744	0.0611229		125.708	89.6671	1.34667
JA178.csv	MK1_ref_MRC_OLG_004	0.323459	0.0212219	0.00555224	0.000157193	0.24751	0.0148342	0.00711185	0.000265624	0.849535	0.0488158	119.03	5.30847	#NUM!	#NUM!	-------------	35.693	1.47233	224.552	15.0501	143.238	6.86194	3585.66	97.3016	-------------	180.108	7.42941	0.323459	0.0212219	-------------	0.24751	0.0165888	0.00555224	0.000229029	0.323548	-------------	0.00711185	0.0003407	0.849535	0.0488158		171.161	119.876	1.80723
JA179.csv	MK1_ref_MRC_OLG_005	0.334406	0.0281758	0.00564725	0.000198146	0.260266	0.0198779	0.00724372	0.000234642	0.930428	0.0631598	121.364	6.86196	#NUM!	#NUM!	-------------	36.3021	1.67585	234.881	19.2734	145.884	6.44087	3636.7	123.32	-------------	177.077	8.17459	0.334406	0.0281758	-------------	0.260266	0.0213564	0.00564725	0.000260699	0.219795	-------------	0.00724372	0.000319815	0.930428	0.0631598		161.228	115.703	1.71101
JA186.csv	MK1_ref_MRC_OLG_006	0.334783	0.0157349	0.00516191	0.000107034	0.238166	0.010277	0.00640797	0.00013596	0.861116	0.0299891	132.694	4.15401	#NUM!	#NUM!	-------------	33.1902	1.2104	216.918	11.4	129.106	4.74397	3638.42	70.1354	-------------	193.727	7.06492	0.334783	0.0157349	-------------	0.238166	0.0125167	0.00516191	0.000188247	0.465126	-------------	0.00640797	0.000235459	0.861116	0.0299891		352.403	252.498	3.46877
JA189.csv	MK1_ref_MRC_OLG_007	0.342448	0.0165755	0.00544829	0.000105367	0.257135	0.011187	0.0068327	0.000147341	0.862886	0.0279819	126.563	3.59182	#NUM!	#NUM!	-------------	35.0266	1.25022	232.355	12.2792	137.634	5.08505	3673.04	72.0054	-------------	183.544	6.5513	0.342448	0.0165755	-------------	0.257135	0.0135888	0.00544829	0.000194468	0.430465	-------------	0.0068327	0.000252442	0.862886	0.0279819		321.053	232.564	3.38269
MK-1_Improved_Deep_Model
JA160.csv	MK1_ref_DUR_BZ2_001	0.335072	0.0163031	0.00525074	9.4252e-05	0.242474	0.0103715	0.00636835	0.00013438	0.870002	0.0268196	132.517	3.35017	#NUM!	#NUM!	-------------	33.7599	1.18025	220.444	11.5172	128.31	4.70615	3639.75	72.5353	------------	190.449	6.65813	0.335072	0.0163031	------------	0.242474	0.0126682	0.00525074	0.000183567	0.406359	------------	0.00636835	0.00013438	0.870002	0.0268196		378.402	270.959	3.81044
JA161.csv	MK1_ref_DUR_BZ2_002	0.333292	0.0164484	0.00507656	0.000106037	0.233185	0.0104082	0.00629896	0.000152392	0.878815	0.0367201	136.471	4.09954	#NUM!	#NUM!	-------------	32.6428	1.19327	212.825	11.4457	126.917	4.89133	3631.59	73.5866	------------	196.984	7.20081	0.333292	0.0164484	------------	0.233185	0.0125407	0.00507656	0.000185575	0.430587	------------	0.00629896	0.000152392	0.878815	0.0367201		375.824	265.571	5.62845
JA162.csv	MK1_ref_DUR_BZ2_003	0.320157	0.0163236	0.00508153	9.97375e-05	0.224214	0.0101557	0.00662155	0.000165224	0.878858	0.0298682	131.805	3.53205	#NUM!	#NUM!	-------------	32.6747	1.17139	205.411	11.1597	133.395	5.20519	3569.88	76.2841	------------	196.791	7.05501	0.320157	0.0163236	------------	0.224214	0.0121813	0.00508153	0.000182174	0.39463	------------	0.00662155	0.000165224	0.878858	0.0298682		368.799	252.592	3.61019
JA163.csv	MK1_ref_DUR_BZ2_004	0.326793	0.0147481	0.00497665	8.83068e-05	0.224138	0.00903468	0.00627462	0.000144466	0.857289	0.0315056	135.694	3.69701	#NUM!	#NUM!	-------------	32.002	1.11542	205.348	10.3182	126.428	4.78108	3601.4	67.5834	------------	200.938	7.00367	0.326793	0.0147481	------------	0.224138	0.0112623	0.00497665	0.00017346	0.457631	------------	0.00627462	0.000144466	0.857289	0.0315056		376.417	260.646	3.58904
JA164.csv	MK1_ref_DUR_BZ2_005	0.318363	0.0132838	0.00514232	8.996e-05	0.225626	0.00853079	0.00681497	0.000148061	0.899105	0.0340729	131.009	3.56172	#NUM!	#NUM!	-------------	33.0646	1.14827	206.581	9.97074	137.279	5.08489	3561.24	62.7751	------------	194.465	6.75339	0.318363	0.0132838	------------	0.225626	0.0108899	0.00514232	0.000178583	0.505497	------------	0.00681497	0.000148061	0.899105	0.0340729		366.221	251.945	3.66288
JA165.csv	MK1_ref_DUR_BZ2_006	0.457533	0.0171411	0.00733263	0.000111751	0.462369	0.0156187	0.00954508	0.000178294	1.16009	0.0292881	120.99	2.53731	#NUM!	#NUM!	-------------	47.0967	1.58476	385.904	17.4345	192.012	6.7857	4109.22	54.5413	------------	136.377	4.58896	0.457533	0.0171411	------------	0.462369	0.020889	0.00733263	0.000246736	0.549193	------------	0.00954508	0.000178294	1.16009	0.0292881		336.663	307.475	5.68941
JA171.csv	MK1_ref_DUR_BZ2_007	0.383851	0.0350241	0.00605938	0.000229897	0.320551	0.026449	0.00813755	0.000313961	1.0157	0.0472317	122.892	6.08973	#NUM!	#NUM!	-------------	38.9434	1.88363	282.326	24.787	163.812	8.00597	3846.32	131.265	------------	165.033	7.98239	0.383851	0.0350241	------------	0.320551	0.028143	0.00605938	0.000293082	0.190992	------------	0.00813755	0.000313961	1.0157	0.0472317		253.231	197.27	3.20808
JA175.csv	MK1_ref_MRC_OLG_001	0.362502	0.0465912	0.00579627	0.000154459	0.289577	0.0307237	0.00736539	0.000240996	0.909406	0.0519462	#NUM!	#NUM!	#NUM!	#NUM!	-------------	37.2573	1.49499	258.227	28.4716	148.325	6.58437	3759.69	182.479	------------	172.525	6.92277	0.362502	0.0465912	------------	0.289577	0.0319283	0.00579627	0.000232583	0.32233	------------	0.00736539	0.000240996	0.909406	0.0519462		243.942	171.033	2.67679
JA176.csv	MK1_ref_MRC_OLG_002	0.385544	0.0156855	0.00600714	0.000118929	0.319189	0.0121381	0.0100022	0.000248516	1.00286	0.0327986	98.5187	3.17587	#NUM!	#NUM!	-------------	38.6087	1.38774	281.278	13.6242	201.163	7.83589	3852.96	60.0585	------------	166.469	5.98352	0.385544	0.0156855	------------	0.319189	0.0154605	0.00600714	0.00021592	0.540744	------------	0.0100022	0.000248516	1.00286	0.0327986		299.836	178.936	3.70707
JA177.csv	MK1_ref_MRC_OLG_003	0.343408	0.0187763	0.00510322	0.000121503	0.241524	0.0119941	0.0067481	0.000158739	0.945901	0.0393913	139.948	4.63623	#NUM!	#NUM!	-------------	32.8138	1.25676	219.668	12.7447	135.936	5.18227	3677.31	81.0452	------------	195.955	7.50502	0.343408	0.0187763	------------	0.241524	0.0140128	0.00510322	0.000195452	0.39231	------------	0.0067481	0.000158739	0.945901	0.0393913		308.22	220.864	3.13195
JA178.csv	MK1_ref_MRC_OLG_004	0.329561	0.0168175	0.00498594	0.000114068	0.226459	0.0105581	0.00622157	0.000129277	0.880259	0.0320976	141.093	4.30391	#NUM!	#NUM!	-------------	32.0616	1.20962	207.271	11.4913	125.362	4.57488	3614.34	76.1123	------------	200.564	7.56686	0.329561	0.0168175	------------	0.226459	0.0125551	0.00498594	0.000188109	0.428607	------------	0.00622157	0.000129277	0.880259	0.0320976		368.952	261.915	3.51876
JA179.csv	MK1_ref_MRC_OLG_005	0.340189	0.0159923	0.00509087	9.1899e-05	0.238681	0.00990722	0.00630026	0.000141512	0.871787	0.0291672	139.803	3.68481	#NUM!	#NUM!	-------------	32.7346	1.14612	217.34	11.131	126.943	4.75741	3662.92	70.0329	------------	196.43	6.87748	0.340189	0.0159923	------------	0.238681	0.0122239	0.00509087	0.000178243	0.429092	------------	0.00630026	0.000141512	0.871787	0.0291672		373.337	267.226	3.6801
JA180.csv	MK1_ref_MRC_OLG_006	0.348399	0.0160513	0.00517169	9.84798e-05	0.248322	0.010242	0.00633449	0.000142195	0.859456	0.0276035	137.068	3.71533	#NUM!	#NUM!	-------------	33.2529	1.18158	225.212	11.4861	127.63	4.78214	3699.32	68.5009	------------	193.36	6.8707	0.348399	0.0160513	------------	0.248322	0.0126648	0.00517169	0.000183766	0.452794	------------	0.00633449	0.000142195	0.859456	0.0276035		370.447	264.745	3.71964
JA186.csv	MK1_ref_MRC_OLG_007	0.34525	0.0193944	0.00532503	0.000128813	0.253373	0.0128752	0.00672394	0.000153565	0.898682	0.037966	134.278	5.04564	#NUM!	#NUM!	-------------	34.2363	1.31939	229.313	13.5318	135.451	5.10706	3685.47	83.1554	------------	187.792	7.23712	0.34525	0.0193944	------------	0.253373	0.0149516	0.00532503	0.000205215	0.376351	------------	0.00672394	0.000153565	0.898682	0.037966		326.554	232.821	3.37537
