# Supplementary material for: A novel in situ methodology for U–Pb, (U–Th)/He, and fission track triple dating
Source: Royal Society of Chemistry journal article supplement (doi:10.1039/d4ja00257a), 2024-01-01
Supplement: d4ja00257a5.xlsx [file d4ja00257a5.xlsx]

## Sheet: BZ2
DM	Grain	Tracks	Area(um2)	Density (tracks/um2)	U (ppm)	U_SE (ppm)	Age (Ma)	Age_SE (Ma)
	Grain01	126	19690	639900	4.0762	0.038057	296	52
	Grain02	119	30200	394100	3.17858	0.035133	235	43
	Grain03	88	23450	375300	2.79193	0.028621	254	53
	Grain04	75	24910	301100	2.65476	0.028881	216	49
	Grain05	87	22640	384200	2.66088	0.025697	274	58
	Grain06	62	26730	231900	2.12124	0.023241	208	52
	Grain07	80	22220	360100	2.06858	0.019048	328	72
	Grain08	128	23200	551800	4.16147	0.035308	251	44
	Grain09	105	20540	511200	3.3437	0.029306	290	56
	Grain10	149	25340	587900	4.38795	0.036096	254	41
	Grain11	95	20350	466900	2.84367	0.029663	309	62
	Grain12	147	25490	576800	3.85127	0.033911	283	46
	Grain13	123	26680	461000	2.74227	0.024906	317	56
	Grain14	122	20850	585100	3.60176	0.026428	306	54
	Grain15	122	23660	515600	3.96541	0.031069	246	44
	Grain16	99	17030	581200	4.26757	0.036344	258	51
	Grain17	136	22540	603300	4.18508	0.037053	273	46
	Grain18	153	21230	720600	4.39938	0.032661	309	49
	Grain19	143	25430	562400	3.69454	0.030818	288	47
	Grain20	139	19610	708900	4.18133	0.035926	320	53
IDM	Grain	Tracks	Area(um2)	Density (tracks/um2)	U (ppm)	U_SE (ppm)	Age (Ma)	Age_SE (Ma)
	Grain01	146	24820	588200	4.64376	0.0373477	240	39
	Grain02	102	16540	616800	4.82403	0.0355946	243	47
	Grain03	75	11140	673100	4.70446	0.0298482	272	62
	Grain04	82	14770	555300	4.77159	0.0366841	220	48
	Grain05	72	13870	519100	3.0772	0.028498	317	73
	Grain06	93	20150	461500	3.42541	0.0322122	254	52
	Grain07	114	19750	577300	3.72035	0.0296293	292	54
	Grain08	72	17000	423600	3.22607	0.0279309	248	58
	Grain09	83	19120	434200	3.41708	0.0344704	241	52
	Grain10	69	17000	405900	3.46273	0.0319942	223	53
	Grain11	51	11540	441800	3.30411	0.0300288	254	70
	Grain12	106	22620	468600	3.05839	0.0301677	289	55
	Grain13	60	15190	395000	3.16717	0.026954	236	60
	Grain14	67	15800	423900	4.37084	0.0331277	185	44
	Grain15	98	19180	511000	4.42955	0.0403477	219	43
	Grain16	92	15450	595400	4.18086	0.0318967	269	55
	Grain17	56	9780	572600	4.50086	0.032082	241	63
	Grain18	42	8345	503300	3.46074	0.0295638	275	83
	Grain19	54	10360	521000	4.34498	0.037114	228	61
	Grain20	113	17670	639500	4.01335	0.0366861	301	56

## Sheet: DUR
DM	Grain	Tracks	Area(um2)	Density (tracks/um2)	U (ppm)	U_SE (ppm)	Age (Ma)	Age_SE (Ma)
	Grain01	37	17050	217000	13.7637	0.08632	30.4	9.8
	Grain02	24	11000	218200	13.8476	0.073377	30.4	12.1
	Grain03	51	28660	178000	14.3814	0.073539	23.8	6.5
	Grain04	29	11140	260400	16.8431	0.097764	29.8	10.8
	Grain05	43	20570	209100	13.8348	0.087185	29.1	8.7
	Grain06	58	18270	317500	19.4874	0.104117	31.4	8.1
	Grain07	56	16740	334500	19.5881	0.10818	32.9	8.6
	Grain08	55	18490	297500	19.743	0.12075	29	7.7
	Grain09	51	16630	306700	19.5106	0.113561	30.3	8.3
	Grain10	41	12160	337300	19.1808	0.109667	33.9	10.4
	Grain11	55	20840	263900	16.7461	0.090057	30.4	8
	Grain12	48	19300	248700	15.8505	0.08959	30.2	8.6
	Grain13	50	19500	256400	15.0406	0.075738	32.8	9.1
	Grain14	42	16090	261000	15.6486	0.083217	32.1	9.7
	Grain15	57	22000	259100	16.1713	0.093006	30.9	8
	Grain16	64	21340	299800	18.1585	0.099923	31.8	7.8
	Grain17	72	27150	265100	17.2643	0.09463	29.6	6.8
	Grain18	40	16880	237000	17.114	0.105215	26.7	8.3
	Grain19	50	19250	259700	16.2788	0.097604	30.7	8.5
	Grain20	47	17850	263300	16.6628	0.106062	30.4	8.7
IDM	Grain	Tracks	Area(um2)	Density (tracks/um2)	U (ppm)	U_SE (ppm)	Age (Ma)	Age_SE (Ma)
	Grain01	40	17490	228700	13.8763	0.0785745	31.7	9.8
	Grain02	32	14390	222400	13.9351	0.0833906	30.7	10.7
	Grain03	33	11650	283300	18.0057	0.0883636	30.3	10.3
	Grain04	60	20540	292100	17.4198	0.0944701	32.3	8.2
	Grain05	43	17610	244200	16.0845	0.0910696	29.3	8.8
	Grain06	28	11760	238100	13.8586	0.0799067	33.1	12.3
	Grain07	54	17670	305600	19.6993	0.0971978	29.9	8
	Grain08	66	21610	305400	19.9332	0.111988	29.5	7.1
	Grain09	57	18790	303400	19.6068	0.111573	29.8	7.7
	Grain10	59	18450	319800	19.6364	0.103089	31.4	8
	Grain11	22	9284	237000	13.835	0.0774834	33	13.8
	Grain12	38	17130	221900	13.9781	0.078186	30.6	9.7
	Grain13	41	18560	220900	13.5465	0.0802018	31.4	9.6
	Grain14	23	10780	213400	14.0991	0.0854672	29.2	11.9
	Grain15	26	11730	221600	13.7589	0.0762343	31	11.9
	Grain16	26	11560	225000	17.025	0.0884713	25.5	9.8
	Grain17	30	14020	214000	13.8634	0.0792459	29.7	10.6
	Grain18	23	10200	225500	15.1454	0.0822087	28.7	11.7
	Grain19	36	15800	227900	13.4779	0.0809542	32.6	10.6
	Grain20	22	14340	153500	12.9497	0.0795002	22.8	9.5

## Sheet: MRC
DM	Grain	Tracks	Area(um2)	Density (tracks/um2)	U (ppm)	U_SE (ppm)	Age (Ma)	Age_SE (Ma)
	Grain01	69	14580	473200	15.7047	0.085968	57.9	13.7
	Grain02	53	14190	373500	15.8979	0.081778	45.2	12.2
	Grain03	103	19830	519400	15.5319	0.09274	64.3	12.4
	Grain04	59	13450	438800	15.8193	0.074217	53.3	13.6
	Grain05	102	20590	495300	15.8084	0.084239	60.2	11.7
	Grain06	103	27960	368400	17.8709	0.099514	39.7	7.7
	Grain07	116	29340	395300	17.9821	0.10977	42.3	7.7
	Grain08	88	22090	398300	17.9185	0.108175	42.8	9
	Grain09	84	19110	439500	16.2577	0.090679	52	11.1
	Grain10	93	21990	423000	16.2224	0.07878	50.1	10.2
	Grain11	81	22610	358200	15.5312	0.098875	44.4	9.7
	Grain12	119	26230	453700	16.4877	0.099218	52.9	9.5
	Grain13	93	25710	361700	18.5907	0.092066	37.5	7.6
	Grain14	112	27180	412000	18.5855	0.094116	42.7	7.9
	Grain15	92	21830	421400	19.1757	0.104193	42.3	8.7
	Grain16	69	19000	363200	13.3332	0.070565	52.4	12.4
	Grain17	66	19050	346400	14.2638	0.080768	46.7	11.3
	Grain18	91	16340	556800	14.2597	0.077252	75	15.4
	Grain19	67	12710	527300	14.5773	0.08846	69.5	16.7
	Grain20	72	15500	464400	14.4844	0.082091	61.6	14.3
IDM	Grain	Tracks	Area(um2)	Density (tracks/um2)	U (ppm)	U_SE (ppm)	Age (Ma)	Age_SE (Ma)
	Grain01	83	23840	348200	15.7047	0.085968	42.7	9.2
	Grain02	81	24790	326700	15.8979	0.081778	39.5	8.6
	Grain03	72	21060	341800	15.5319	0.09274	42.3	9.8
	Grain04	77	21770	353800	15.8193	0.074217	43	9.6
	Grain05	47	14320	328100	15.8084	0.084239	40	11.4
	Grain06	52	14380	361700	17.8709	0.099514	38.9	10.6
	Grain07	57	16580	343800	17.9821	0.10977	36.8	9.6
	Grain08	63	16140	390300	17.9185	0.108175	42	10.4
	Grain09	68	17830	381400	16.2577	0.090679	45.2	10.8
	Grain10	72	14890	483500	16.2224	0.07878	57.3	13.2
	Grain11	86	22690	379000	15.5312	0.098875	46.9	9.9
	Grain12	74	22230	332800	16.4877	0.099218	38.9	8.9
	Grain13	76	18510	410600	18.5907	0.092066	42.5	9.6
	Grain14	60	18060	332300	18.5855	0.094116	34.3	8.7
	Grain15	42	11100	372000	19.1757	0.104193	38	11.5
	Grain16	62	18950	327100	13.3332	0.070565	47.1	11.7
	Grain17	60	14690	408600	14.2638	0.080768	55	13.9
	Grain18	107	26490	403900	14.2597	0.077252	54.4	10.3
	Grain19	41	10750	381400	14.5773	0.08846	50.1	15.3
	Grain20	107	25490	419800	14.4844	0.082091	55.7	10.6

## Sheet: OLG
DM	Grain	Tracks	Area(um2)	Density (tracks/um2)	U (ppm)	U_SE (ppm)	Age (Ma)	Age_SE (Ma)
	Grain01	238	3558	6689000	116.444	0.578164	110	14
	Grain02	268	4019	6668000	116.556	0.420485	110	13
	Grain03	261	3974	6567000	114.488	0.484654	110	13
	Grain04	270	3980	6784000	114.756	0.57141	113	14
	Grain05	286	3998	7154000	115.519	0.574477	118	14
	Grain06	246	3984	6174000	110.272	0.532793	107	13
	Grain07	260	4004	6494000	113.177	0.564066	110	13
	Grain08	203	3152	6440000	113.689	0.468719	108	15
	Grain09	262	3899	6719000	115.68	0.500848	111	13
	Grain10	237	3645	6502000	114.024	0.570693	109	14
	Grain11	269	4006	6716000	114.826	0.526758	112	13
	Grain12	304	3994	7612000	114.601	0.557367	127	14
	Grain13	248	4004	6194000	114.02	0.52939	104	13
	Grain14	268	4017	6671000	113.391	0.473766	113	14
	Grain15	247	4031	6127000	115.38	0.495009	102	13
	Grain16	301	3992	7540000	115.959	0.554617	124	14
	Grain17	333	4138	8047000	113.42	0.478486	136	15
	Grain18	279	4011	6955000	114.752	0.541695	116	14
	Grain19	294	3998	7354000	116.247	0.571358	121	14
	Grain20	299	3984	7505000	112.809	0.481498	127	14
IDM	Grain	Tracks	Area(um2)	Density (tracks/um2)	U (ppm)	U_SE (ppm)	Age (Ma)	Age_SE (Ma)
	Grain01	476	6989	6811000	114.239	0.505626	114	10
	Grain02	519	7100	7310000	114.096	0.613308	123	11
	Grain03	486	6914	7029000	114.392	0.569424	118	11
	Grain04	477	7072	6745000	115.26	0.539024	112	10
	Grain05	512	7160	7151000	112.662	0.480731	121	11
	Grain06	471	7033	6697000	112.427	0.56254	114	10
	Grain07	452	7080	6385000	114.05	0.642639	107	10
	Grain08	475	7014	6772000	112.086	0.513995	116	10
	Grain09	444	6377	6962000	111.445	0.533025	120	11
	Grain10	536	7080	7571000	113.513	0.559835	128	11
	Grain11	491	7048	6966000	113.471	0.5325	117	10
	Grain12	485	7082	6848000	114.601	0.520127	114	10
	Grain13	563	7323	7689000	112.466	0.524734	131	11
	Grain14	530	7100	7464000	112.189	0.565282	127	11
	Grain15	522	7012	7444000	113.386	0.518688	126	11
	Grain16	545	7317	7448000	111.468	0.559668	128	11
	Grain17	514	7059	7282000	111.527	0.477449	125	11
	Grain18	497	7080	7020000	111.898	0.48424	120	11
	Grain19	511	7105	7192000	110.344	0.498041	125	11
	Grain20	534	7082	7540000	113.89	0.509346	127	11
