# Supplementary material for: A novel in situ methodology for U–Pb, (U–Th)/He, and fission track triple dating
Source: Royal Society of Chemistry journal article supplement (doi:10.1039/d4ja00257a), 2024-01-01
Supplement: d4ja00257a6.xlsx [file d4ja00257a6.xlsx]

## Sheet: JAAS
Deep Model														Improved Deep Model
Sample	U(ppm)	Sigma	Th(ppm)	sigma	Sm(ppm)	Sigma	He_atoms	Sigma	Depth(μm)	Sigma	Age (Ma)	Sigma	Comments	Sample	U(ppm)	Sigma	Th(ppm)	sigma	Sm(ppm)	Sigma	He_atoms	Sigma	Depth(μm)	Sigma	Age (Ma)	Sigma
DUR_BZ2_DUR_ref - 1	19.8375	0.102324	353.939	1.71349	263.875	2.65159	5.43412e+08	6.76776e+06	20.6122	0.743185	31.15	0.23		DUR_ref_DUR_BZ2 - 1	16.6689	0.0849976	327.304	1.50125	242.3	2.38758	2.24545e+08	3.86523e+06	15.0171	0.541448	31.15	0.23
DUR_BZ2_DUR_ref - 2	19.6992	0.107182	353.306	1.84506	262.641	2.70679	5.42984e+08	6.85203e+06	20.8161	0.750537	31.15	0.23		DUR_ref_DUR_BZ2 - 2	16.4259	0.0983914	320.413	1.92856	236.522	2.28368	2.22476e+08	3.93669e+06	14.7023	0.530099	31.15	0.23
DUR_BZ2_DUR_ref - 3	19.3599	0.112652	347.992	1.65435	265.318	2.68422	5.33944e+08	6.67765e+06	20.8657	0.752324	31.15	0.23		DUR_ref_DUR_BZ2 - 3	17.1225	0.0933622	332.349	1.41524	253.437	2.44942	2.29911e+08	4.08239e+06	15.7136	0.566562	31.15	0.23
DUR_BZ2_DUR_ref - 4	18.9784	0.10465	349.633	1.63196	265.333	2.97288	5.22604e+08	6.66162e+06	20.8839	0.75298	31.15	0.23		DUR_ref_DUR_BZ2 - 4	15.6625	0.0884516	305.929	1.31098	224.215	1.988	2.35955e+08	3.96004e+06	14.9012	0.537271	31.15	0.23
DUR_BZ2_DUR_ref - 5	19.0777	0.118353	350.791	1.74436	262.23	2.47111	5.29249e+08	6.63354e+06	20.3723	0.734534	31.15	0.23		DUR_ref_DUR_BZ2 - 5	17.3073	0.103373	333.936	1.70943	251.585	2.19517	2.36454e+08	4.15076e+06	15.3056	0.551849	31.15	0.23
DUR_BZ2_DUR_ref - 6	18.2221	0.0997649	341.282	1.60738	259.865	2.86619	5.24157e+08	7.46669e+06	20.8954	0.753394	31.15	0.23		DUR_ref_DUR_BZ2 - 6	17.2287	0.0871523	335.7	1.46166	247.14	2.16368	2.48546e+08	4.04778e+06	15.375	0.554353	31.15	0.23
DUR_BZ2_DUR_ref - 7	17.2612	0.0956597	352.824	1.80255	231.884	2.12407	2.31987e+08	4.65016e+06	14.981	0.540148	31.15	0.23	not used	DUR_ref_DUR_BZ2 - 7	17.3333	0.100968	334.861	1.66008	255.911	2.50941	2.46527e+08	4.81287e+06	15.6082	0.562761	31.15	0.23
DUR - 1	13.7637	0.08632	305.154	1.4149	236.339	2.35626	424000000	7601897	22.1004	0.796841	27.579	1.216		DUR - 1	13.8763	0.0785745	255.952	1.13466	227.022	2.15341	199000000	3579437	15.805	0.569859	32.154	1.4087
DUR - 2	13.8476	0.073377	306.086	1.27841	233.374	2.10372	427000000	7093563	21.1926	0.764112	28.862	1.2485		DUR - 2	13.9351	0.0833906	263.093	1.32853	217.096	2.05149	207000000	4158809	21.5222	0.775993	24.021	1.0792
DUR - 3	14.3814	0.073539	313.997	1.35221	238.633	2.32169	434000000	5927386	21.9241	0.790485	27.592	1.1692		DUR - 3	18.0057	0.0883636	307.516	1.35255	244.845	2.21502	234000000	5163263	16.7827	0.605107	29.23	1.3404
DUR - 4	16.8431	0.097764	344.272	1.49731	232.061	2.26443	488000000	6312336	21.5678	0.777637	28.452	1.2021		DUR - 4	17.4198	0.0944701	308.656	1.30345	246.676	2.45885	211000000	3823338	19.6345	0.707933	22.615	0.99394
DUR - 5	13.8348	0.087185	304.531	1.51867	237.474	2.26081	428000000	7218864	22.2506	0.802258	27.675	1.2038		DUR - 5	16.0845	0.0910696	300.861	1.48772	243.668	1.93362	234000000	4209930	17.4571	0.629423	29.217	1.282
DUR - 6	19.4874	0.104117	350.581	1.60365	259.917	2.38486	505000000	6812103	22.2192	0.801126	27.421	1.1598		DUR - 6	13.8586	0.0799067	264.952	1.23937	226.767	2.14177	236000000	4135125	17.8332	0.642987	32.884	1.431
DUR - 7	19.5881	0.10818	346.916	1.7339	257.984	2.31386	514000000	7393609	21.1699	0.763292	29.512	1.2552		DUR - 7	19.6993	0.0971978	351.372	1.49354	250.705	2.38729	266000000	5871013	16.7955	0.605571	29.303	1.3428
DUR - 8	19.743	0.12075	349.65	1.6309	255.635	2.5084	518000000	7572902	22.1488	0.798588	28.208	1.2066		DUR - 8	19.9332	0.111988	350.256	1.5031	255.555	2.38295	269000000	4238574	15.9962	0.576751	31.121	1.3413
DUR - 9	19.5106	0.113561	345.388	1.70409	260.088	2.52712	514000000	6598812	22.2502	0.802243	28.203	1.1868		DUR - 9	19.6068	0.111573	343.436	1.57875	250.531	2.25582	272000000	4734623	16.796	0.605587	30.545	1.3376
DUR - 10	19.1808	0.109667	349.774	1.68672	261.002	2.5345	511000000	7989850	22.3303	0.80513	27.745	1.2007		DUR - 10	19.6364	0.103089	348.069	1.67396	252.844	2.13617	273000000	4554319	15.0443	0.542431	33.863	1.4622
DUR - 11	16.7461	0.090057	308.382	1.28064	259.454	2.20845	449000000	6341048	21.9611	0.791819	28.155	1.1952		DUR - 11	13.835	0.0774834	307.734	1.44478	235.053	2.21437	230000000	3837883	15.3114	0.55206	32.986	1.4255
DUR - 12	15.8505	0.08959	298.199	1.48281	249.437	2.16755	436000000	5923873	20.7731	0.748985	30.012	1.2739		DUR - 12	13.9781	0.078186	313.525	1.49849	231.505	1.89609	231000000	4060192	15.5938	0.562244	31.977	1.3932
DUR - 13	15.0406	0.075738	282.194	1.17437	240.294	2.27901	418000000	6269219	22.44	0.809087	28.128	1.2054		DUR - 13	13.5465	0.0802018	304.156	1.43524	232.129	2.20423	231000000	3898722	21.5057	0.775399	23.898	1.0417
DUR - 14	15.6486	0.083217	293.18	1.4437	248.989	2.39622	434000000	6492694	21.4203	0.772319	29.439	1.2589		DUR - 14	14.0991	0.0854672	268.071	1.34934	215.531	2.31255	198000000	3607671	15.274	0.550713	31.816	1.3977
DUR - 15	16.1713	0.093006	297.172	1.41319	253.485	2.22809	448000000	5909181	21.6492	0.780573	29.557	1.2484		DUR - 15	13.7589	0.0762343	258.987	1.43407	228.053	2.00368	214000000	3792599	15.0777	0.543636	35.958	1.5668
DUR - 16	18.1585	0.099923	304.426	1.45168	254.963	2.51815	460000000	6226460	20.8254	0.750869	30.249	1.2803		DUR - 16	17.025	0.0884713	318.318	1.27698	248.985	1.91683	248000000	4009817	15.8634	0.571963	32.217	1.3845
DUR - 17	17.2643	0.09463	303.201	1.54773	250.296	2.29574	455000000	6486801	21.2709	0.766934	29.695	1.2695		DUR - 17	13.8634	0.0792459	290.166	1.38017	233.8	2.34943	220000000	3784361	16.4538	0.593252	30.831	1.3369
DUR - 18	17.114	0.105215	303.362	1.4009	255.225	2.46971	451000000	6027143	21.5303	0.776286	29.114	1.2361		DUR - 18	15.1454	0.0822087	295.173	1.4018	223.965	2.26198	236000000	3899920	15.9371	0.574622	33.143	1.4254
DUR - 19	16.2788	0.097604	302.856	1.35488	250.796	2.46873	448000000	5935710	22.0247	0.79411	28.583	1.2037		DUR - 19	13.4779	0.0809542	251.41	1.27568	210.86	1.88346	198000000	4104219	16.3132	0.58818	31.645	1.4284
DUR - 20	16.6628	0.106062	301.033	1.57655	251.389	2.43767	449000000	6841875	20.452	0.737406	30.861	1.3298		DUR - 20	12.9497	0.0795002	247.75	1.2289	204.108	1.99858	193000000	3575129	16.2993	0.587678	31.469	1.391
BZ2 - 1	4.0762	0.038057	44.4093	0.267652	390.514	3.52155	464000000	6928918	23.9307	0.862835	158.73	6.7616		BZ2 - 1	4.64376	0.0373477	50.3515	0.245115	431.543	4.03597	178000000	3376450	15.6371	0.563803	126.7	5.5597
BZ2 - 2	3.17858	0.035133	34.947	0.332128	349.457	3.33633	348000000	5453569	22.5926	0.814586	159.97	6.8989		BZ2 - 2	4.82403	0.0355946	50.0104	0.274678	423.6	3.84782	252000000	5107088	14.6523	0.528297	189.96	8.4781
BZ2 - 3	2.79193	0.028621	31.0636	0.19679	340.168	3.3922	328000000	5072482	23.2412	0.837974	164.9	7.0876		BZ2 - 3	4.70446	0.0298482	49.0177	0.209704	421.977	3.41278	215000000	3720790	15.6847	0.565522	154.87	6.7386
BZ2 - 4	2.65476	0.028881	28.5702	0.19011	317.72	3.0849	295000000	4691268	22.1455	0.798466	167.59	7.2291		BZ2 - 4	4.77159	0.0366841	51.2871	0.290396	433.271	4.33723	210000000	5043121	15.809	0.570002	144.75	6.7208
BZ2 - 5	2.66088	0.025697	29.2567	0.158318	334.392	2.94775	310000000	4487241	23.634	0.852137	161.93	6.8741		BZ2 - 5	3.0772	0.028498	34.9904	0.187119	346.908	2.93891	165000000	3206044	15.9498	0.57508	166.69	7.4174
BZ2 - 6	2.12124	0.023241	21.851	0.11387	296.255	2.60397	234000000	4237836	24.8381	0.89555	151.9	6.6801		BZ2 - 6	3.42541	0.0322122	38.44	0.212772	365.025	2.99768	171000000	4282973	17.4514	0.629218	143.57	6.7479
BZ2 - 7	2.06858	0.019048	21.4105	0.136217	285.654	2.90392	233000000	3723880	23.6883	0.854093	162.06	6.9574		BZ2 - 7	3.72035	0.0296293	44.1461	0.223278	389.469	3.61887	226000000	4352931	14.6291	0.527461	200.03	8.8397
BZ2 - 8	4.16147	0.035308	48.9202	0.293022	424.451	3.63687	733000000	8767412	24.8189	0.894858	223.51	9.269		BZ2 - 8	3.16717	0.026954	35.7411	0.226419	353.495	3.18946	190000000	3571569	15.9142	0.573794	187.86	8.2286
BZ2 - 9	3.3437	0.029306	37.4059	0.204906	375.704	3.09228	415000000	5643250	22.3571	0.806095	180.79	7.6462		BZ2 - 9	3.41708	0.0344704	40.9606	0.278308	369.259	3.12026	218000000	4152299	15.3875	0.554803	198.05	8.6834
BZ2 - 10	4.18133	0.035926	44.6358	0.232733	396.551	3.4967	501000000	7036532	24.32	0.87687	166.78	7.0763		BZ2 - 10	3.46273	0.0319942	43.0828	0.225269	382.287	3.32592	439000000	6122587	16.1842	0.583531	361.96	15.059
BZ2 - 11	2.84367	0.029663	35.0076	0.240202	333.593	2.996	393000000	5433387	22.9738	0.828331	182.86	7.758		BZ2 - 11	3.30411	0.0300288	39.2552	0.19935	377.783	3.18795	172000000	3662275	14.6367	0.527736	170.9	7.7168
BZ2 - 12	3.85127	0.033911	43.4527	0.279563	391.243	3.69225	485000000	6532550	23.7003	0.854526	172.67	7.2563		BZ2 - 12	3.05839	0.0301677	35.9823	0.21094	346.292	3.30017	190000000	3466893	15.9198	0.573996	188.72	8.2153
BZ2 - 13	2.74227	0.024906	33.2175	0.222506	324.904	3.19564	372000000	6761898	21.1862	0.76388	196.62	8.5943		BZ2 - 13	3.22607	0.0279309	38.6539	0.191207	357.151	3.3785	252000000	4530245	14.969	0.539714	248.64	10.805
BZ2 - 14	3.60176	0.026428	41.4327	0.236148	380.076	2.95062	411000000	7145993	23.7608	0.856709	153.89	6.7239		BZ2 - 14	4.37084	0.0331277	48.0064	0.24506	419.984	3.39332	256000000	4132066	15.1361	0.54574	197.36	8.4913
BZ2 - 15	3.96541	0.031069	45.3866	0.227654	396.036	3.30602	441000000	6539873	22.6441	0.816446	158.13	6.7529		BZ2 - 15	4.42955	0.0403477	48.9426	0.273388	413.902	3.61699	279000000	4360794	15.4885	0.558447	206.68	8.8304
BZ2 - 16	4.26757	0.036344	49.9924	0.267748	403.643	3.66606	488000000	6845292	0.863273	0.0311258	3634.3	105.73		BZ2 - 16	4.18086	0.0318967	45.8734	0.213357	399.096	3.66238	282000000	4533090	15.4573	0.557323	222.56	9.5331
BZ2 - 17	4.18508	0.037053	44.9507	0.253483	393.664	3.36323	502000000	7641376	23.64	0.852351	171	7.2929		BZ2 - 17	4.50086	0.032082	50.765	0.243194	419.68	3.72393	212000000	4187800	15.2639	0.55035	155	6.8695
BZ2 - 18	4.39938	0.032661	45.7296	0.185869	392.481	3.15086	495000000	6750478	0.652326	0.0235199	4846.2	83.211		BZ2 - 18	3.46074	0.0295638	37.5291	0.216773	366.891	3.59425	243000000	4130775	15.9005	0.573302	226.3	9.7225
BZ2 - 19	3.69454	0.030818	38.9341	0.227177	368.025	3.0952	458000000	6486284	22.3932	0.807398	188.71	8.0087		BZ2 - 19	4.34498	0.037114	48.285	0.263324	411.093	3.68712	296000000	4858366	16.1558	0.582506	213.35	9.1279
BZ2 - 20	4.38795	0.036096	50.4714	0.28794	411.104	3.29149	708000000	9083937	22.0361	0.794525	234.6	9.775		BZ2 - 20	4.01335	0.0366861	45.1477	0.2258	391.587	3.36437	290000000	4452034	14.9366	0.538546	242.12	10.3
MK1_BZ2_DUR-1	224.048	1.07616	160.085	0.73705	7.08606	0.255328	853000000	10679010	20.2197	0.72903	19.97	0.84072		MK1_DURBZ2-1	222.469	2.13614	159.618	1.45216	6.95619	0.492067	4.54551e+08	6.49117e+06	17.3684	0.626227	19.219	0.83082
MK1_BZ2_DUR-2	225.72	1.09313	159.212	0.849053	7.28063	0.240278	841000000	9835774	20.248	0.730052	19.552	0.81754		MK1_DURBZ2-2	225.485	2.23912	158.968	1.34533	7.23235	0.550701	4.42451e+08	6.29042e+06	15.0432	0.542391	21.323	0.91604
MK1_BZ2_DUR-3	224.615	0.98172	161.144	0.601323	7.1722	0.277829	576000000	8457342	22.0649	0.795562	12.33	0.52909		MK1_DURBZ2-3	221.571	2.12071	152.205	1.47465	6.87346	0.508711	4.38577e+08	5.91593e+06	17.7444	0.639782	18.345	0.78557
MK1_BZ2_DUR-4	220.24	1.16318	151.012	0.709943	6.26702	0.261334	815000000	10466010	1.22624	0.0442126	313.13	11.973		MK1_DURBZ2-4	223.952	2.01481	155.483	1.40046	6.54543	0.524032	4.31109e+08	6.05747e+06	17.0454	0.614582	18.512	0.78968
MK1_BZ2_DUR-5	226.689	1.12314	162.784	0.806683	6.71762	0.219516	789000000	10423723	20.613	0.743214	17.902	0.75441		MK1_DURBZ2-5	220.694	1.92589	151.592	1.38001	6.11138	0.456582	4.29236e+08	5.85831e+06	17.2311	0.621278	18.531	0.79066
MK1_BZ2_DUR-6	218.639	1.19731	156.772	0.895788	6.97717	0.328281	807000000	11251884	1.48789	0.0536466	257.42	10.21		MK1_DURBZ2-6	217.576	2.43587	169.232	1.79276	6.64147	0.634877	4.29756e+08	6.13535e+06	15.931	0.5744	20.004	0.86205
MK1_BZ2_DUR-7	223.222	1.02488	163.031	0.728745	6.88586	0.256523	796000000	9524517	21.3844	0.771026	17.637	0.73794		MK1_DURBZ2-7	202.607	1.56097	184.628	1.52799	6.83492	0.470805	4.18997e+08	5.84839e+06	14.7474	0.531726	22.017	0.93626
DUR_BZ2_DUR_ref - 1	18.0661	0.102746	346.623	1.55277	260.722	2.36701	4.87467e+08	6.28062e+06	20.8538	0.751894	31.15	0.23		DUR_ref_MRC_OLG - 1	14.3682	0.0765399	277.273	1.2998	219.878	1.96316	2.33518e+08	4.35843e+06	14.9451	0.538852	31.15	0.23
DUR_BZ2_DUR_ref - 2	17.2702	0.0956065	339.374	1.78295	255.094	2.41147	4.73988e+08	6.55054e+06	20.3274	0.732915	31.15	0.23		DUR_ref_MRC_OLG - 2	15.6763	0.0900224	304.694	1.35721	228.442	1.98817	2.62487e+08	4.46474e+06	18.5466	0.668707	31.15	0.23
DUR_BZ2_DUR_ref - 3	17.232	0.0936466	338.994	1.78356	249.832	2.52902	4.63849e+08	6.38661e+06	20.0982	0.72465	31.15	0.23		DUR_ref_MRC_OLG - 3	16.4091	0.101468	326.961	1.48984	232.366	2.16555	2.70196e+08	4.24178e+06	15.1855	0.547521	31.15	0.23
DUR_BZ2_DUR_ref - 4	16.0252	0.090399	314.462	1.48703	226.94	2.34084	5.20081e+08	7.19921e+06	19.9853	0.720579	31.15	0.23		DUR_ref_MRC_OLG - 4	14.0039	0.0750766	273.742	1.28912	217.407	2.08885	2.31987e+08	4.65016e+06	14.6102	0.526777	31.15	0.23
DUR_BZ2_DUR_ref - 5	17.6165	0.0988838	359.34	1.85856	232.242	2.17109	5.02425e+08	6.56485e+06	19.6891	0.709901	31.15	0.23		DUR_ref_MRC_OLG - 5	13.3768	0.0681516	263.467	1.16867	209.267	1.81429	2.16443e+08	4.6693e+06	14.8328	0.534804	31.15	0.23
DUR_BZ2_DUR_ref - 6	15.1846	0.104511	328.166	1.73773	236.564	2.34777	5.10113e+08	6.50864e+06	0.383256	0.0138185	31.15	0.23	not used	DUR_ref_MRC_OLG - 6	14.6961	0.0817832	280.323	1.19807	232.118	2.11178	2.24545e+08	3.86523e+06	15.1591	0.546568	31.15	0.23
DUR_BZ2_DUR_ref - 7	16.2982	0.0826085	294.034	1.36612	247.068	1.87277	2.46527e+08	4.81287e+06	15.2331	0.549237	31.15	0.23	not used	DUR_ref_MRC_OLG - 7	14.0832	0.067732	269.648	1.24976	221.624	1.99097	2.22476e+08	3.93669e+06	15.7467	0.567756	31.15	0.23
MRC - 1	15.7047	0.085968	160.648	0.896345	84.0317	1.10834	172000000	3609333	24.4463	0.881425	16.452	0.75485		MRC - 1	15.943	0.087796	153.848	0.747639	83.2983	1.12795	90507062	2814934	16.1354	0.581771	17.974	0.90909
MRC - 2	15.8979	0.081778	163.725	0.745861	87.3393	1.03518	155000000	2882440	22.7787	0.821299	15.642	0.70037		MRC - 2	17.8921	0.101586	154.129	0.705747	86.3453	1.07531	91938403	2802900	16.6733	0.601166	17.017	0.85512
MRC - 3	15.5319	0.09274	160.979	0.840447	82.7436	1.00762	168000000	3011788	20.0269	0.72208	19.646	0.87423		MRC - 3	15.7007	0.092861	135.68	0.65975	80.5731	0.916106	88647845	3953264	31.3282	1.12956	9.9285	0.59503
MRC - 4	15.8193	0.074217	169.705	0.730055	82.5914	0.988918	182000000	3203362	0.624884	0.0225305	640.84	25.732		MRC - 4	15.7821	0.078591	138.365	0.640932	80.0718	0.910159	101000000	5269513	16.2213	0.584866	21.528	1.4113
MRC - 5	15.8084	0.084239	166.456	0.730705	83.8621	1.0169	211000000	3696714	22.6466	0.816534	21.196	0.94325		MRC - 5	15.898	0.075467	135.796	0.597161	79.317	0.978446	98966189	4935784	15.8336	0.57089	21.841	1.3954
MRC - 6	17.8709	0.099514	154.532	0.778675	89.0156	1.17999	226000000	4003101	22.08	0.796105	23.609	1.0533		MRC - 6	15.8135	0.084223	134.398	0.645014	80.4794	0.930002	93615017	2539743	23.3218	0.840878	14.146	0.68376
MRC - 7	17.9821	0.10977	155.22	0.792802	88.5534	1.02558	259000000	4069765	24.8915	0.897476	23.882	1.0464		MRC - 7	15.7707	0.083813	133.768	0.588883	78.9561	0.959472	100000000	3493358	21.7044	0.782564	16.305	0.86425
MRC - 8	17.9185	0.108175	154.377	0.703661	88.0867	1.17386	201000000	3546620	24.4149	0.88029	18.993	0.84413		MRC - 8	15.82	0.075872	136.019	0.624161	80.6551	1.03235	115000000	4186743	22.3111	0.804439	18.015	0.97228
MRC - 9	16.2577	0.090679	146.574	0.709372	82.1933	1.00274	165000000	3442639	0.847158	0.0305447	468.62	20.721		MRC - 9	18.0448	0.097204	152.79	0.65779	86.9942	1.02929	90653912	4112392	15.2361	0.549346	18.426	1.1137
MRC - 10	16.2224	0.07878	144.442	0.718476	83.8975	0.99552	173000000	3225084	24.4921	0.883075	17.604	0.78813		MRC - 10	17.9569	0.092674	152.347	0.638471	87.4042	0.995676	91425330	6623051	15.4066	0.555492	18.425	1.5258
MRC - 11	15.5312	0.098875	136.5	0.6847	79.3505	1.00111	157000000	2912894	22.7365	0.819776	18.129	0.81279		MRC - 11	15.2079	0.076691	157.775	0.687013	80.6621	1.08438	79247785	4289740	14.9484	0.538973	16.919	1.1395
MRC - 12	16.4877	0.099218	146.968	0.763974	84.8781	1.03085	307000000	5523106	24.6527	0.888865	30.493	1.3607		MRC - 12	15.2991	0.089128	153.346	0.792689	78.276	0.880489	71880306	3461896	22.4395	0.809067	10.426	0.65309
MRC - 13	18.5907	0.092066	157.282	0.747499	88.8063	1.05839	167000000	3133475	22.1113	0.797236	17	0.76481		MRC - 13	14.857	0.093716	156.836	0.810242	81.3527	1.02761	81235879	3472318	20.0085	0.721418	13.104	0.76702
MRC - 14	18.5855	0.094116	155.62	0.69046	87.4383	1.04896	200000000	3339436	22.2352	0.8017	20.381	0.89639		MRC - 14	14.7507	0.091533	154.627	0.775396	79.8479	1.04331	90590262	4578705	20.3589	0.734049	14.546	0.93643
MRC - 15	19.1757	0.104193	158.977	0.698918	90.2327	1.03508	189000000	3507501	21.0414	0.758659	19.863	0.89081		MRC - 15	14.331	0.076967	154.263	0.785993	79.6587	0.947901	89975263	3406694	21.1271	0.761749	14.063	0.77459
MRC - 16	13.3332	0.070565	151.128	0.697783	71.5968	0.956919	134000000	4565613	1.00689	0.0363039	334.87	18.362		MRC - 16	16.8109	0.096458	162.483	0.703024	84.8798	0.899776	68445456	5015585	15.4459	0.55691	13.447	1.1248
MRC - 17	14.2638	0.080768	151.267	0.746936	74.2991	0.905132	357000000	5019615	21.5822	0.778157	41.474	1.7917		MRC - 17	18.5469	0.095089	159.756	0.805358	89.2524	1.12277	82892143	2800437	15.0308	0.541942	16.424	0.85887
MRC - 18	14.2597	0.077252	151.261	0.671894	79.1005	0.954616	163000000	3213492	0.544646	0.0196375	733.76	32.64		MRC - 18	18.9006	0.108429	168.359	0.874517	94.445	1.06059	74495715	5558037	15.7765	0.568829	13.489	1.1425
MRC - 19	14.5773	0.08846	160.656	0.828477	80.2925	1.09369	170000000	3048460	0.644905	0.0232524	617.89	24.515		MRC - 19	18.4405	0.094162	163.354	0.724036	90.4775	1.04218	310000000	4678486	15.4559	0.55727	58.818	2.5187
MRC - 20	14.4844	0.082091	159.491	0.69115	79.3068	0.912124	151000000	4710626	20.7936	0.749723	17.472	0.89711		MRC - 20	17.9153	0.089036	154.078	0.684297	87.5988	1.03294	111000000	3975505	15.6408	0.563936	21.894	1.1721
OLG - 1	116.444	0.578164	952.619	4.09844	419.998	3.13766	13200000000	135000000	24.8639	0.896482	193.53	8.0878		OLG - 1	114.239	0.505626	929.883	3.82376	414.397	3.01834	7340000000	76593608	16.6255	0.599442	219.5	8.9858
OLG - 2	116.556	0.420485	951.458	3.94898	420.159	3.69901	13000000000	134000000	23.7593	0.856655	199.45	8.3308		OLG - 2	114.096	0.613308	919.05	4.84972	415.627	3.36606	7470000000	77561380	15.7848	0.56913	237.12	9.72
OLG - 3	114.488	0.484654	942.55	4.00091	414.307	3.30454	12600000000	130000000	24.0995	0.868921	193.01	8.0514		OLG - 3	114.392	0.569424	928.335	4.61958	423.73	3.63784	6640000000	69275030	16.0427	0.578427	206.13	8.468
OLG - 4	114.756	0.57141	916.394	4.15691	410.969	3.64556	12700000000	130000000	23.5584	0.849408	202.44	8.4368		OLG - 4	115.26	0.539024	934.038	4.74982	418.069	3.88604	5640000000	58064690	15.9446	0.57489	175.28	7.146
OLG - 5	115.519	0.574477	931.985	4.38551	409.208	3.83857	12700000000	129000000	23.8185	0.858789	197.64	8.2411		OLG - 5	112.662	0.480731	915.499	4.8155	413.452	3.54871	7110000000	74201588	16.1066	0.580731	222.76	9.1149
OLG - 6	115.38	0.495009	936.264	3.92167	420.089	3.22618	13100000000	134000000	24.42	0.880475	198.33	8.2555		OLG - 6	112.427	0.56254	905.96	3.97646	418.009	3.68986	6950000000	72575269	15.4603	0.557428	228.56	9.385
OLG - 7	113.177	0.564066	918.575	4.50172	420.574	3.54002	12600000000	130000000	22.6555	0.816855	209.43	8.7523		OLG - 7	114.05	0.642639	924.26	4.37559	414.293	3.78671	6370000000	67201521	15.9519	0.575153	199.71	8.2473
OLG - 8	113.689	0.468719	923.616	3.79615	423.998	3.53963	12200000000	125000000	23.927	0.862701	191.2	7.9456		OLG - 8	112.086	0.513995	915.981	4.34761	411.065	3.10525	6100000000	65483884	16.0286	0.577918	192.63	7.9341
OLG - 9	115.68	0.500848	942.835	4.1507	421.891	3.6621	12700000000	129000000	23.5173	0.847927	198.54	8.2801		OLG - 9	111.445	0.533025	911.185	3.67954	412.56	3.26656	6750000000	70570702	14.7638	0.532315	232.3	9.471
OLG - 10	114.024	0.570693	918.785	4.17844	411.021	3.67991	12400000000	127000000	23.9396	0.863155	194.71	8.0926		OLG - 10	113.513	0.559835	918.795	4.29809	410.473	3.70626	6250000000	65105164	15.5942	0.562257	201.56	8.2367
OLG - 11	114.826	0.526758	924.605	3.97423	417.045	3.23939	11500000000	118000000	22.4364	0.808956	191.41	7.9827		OLG - 11	113.471	0.5325	922.267	4.57917	424.772	3.67683	7760000000	81587075	15.0404	0.54229	258.08	10.522
OLG - 12	114.601	0.557367	925.183	4.40941	420.398	3.82946	10900000000	112000000	23.8781	0.860936	170.7	7.1195		OLG - 12	114.601	0.520127	931.283	4.08867	424.469	3.3454	7690000000	78750130	15.0872	0.543976	252.5	10.247
OLG - 13	114.02	0.52939	922.53	4.68222	419.983	3.42768	9980000000	103000000	21.0286	0.758198	178.05	7.4466		OLG - 13	112.466	0.524734	908.799	3.94793	418.913	3.24141	7470000000	76758299	16.5018	0.594979	229.66	9.3271
OLG - 14	113.391	0.473766	926.45	4.07155	414.052	3.20191	11900000000	122000000	23.0984	0.832825	192.98	8.0203		OLG - 14	112.189	0.565282	906.346	4.18672	408.138	3.4681	7450000000	77583084	15.8353	0.570951	239.12	9.7656
OLG - 15	110.272	0.532793	882.082	3.99398	409.338	3.68225	12200000000	124000000	19.8035	0.714024	240.1	9.9373		OLG - 15	113.386	0.518688	924.426	3.92518	413.886	3.72695	7290000000	76110386	16.2562	0.586125	224.35	9.2238
OLG - 16	115.959	0.554617	943.418	4.67787	425.209	3.63946	13300000000	136000000	12.3116	0.4439	393.05	16.114		OLG - 16	111.468	0.559668	891.726	4.34722	415.54	3.46612	7240000000	74887992	15.9776	0.576082	233.37	9.5944
OLG - 17	113.42	0.478486	931.024	3.9795	417.207	3.19471	13200000000	134000000	24.1774	0.871727	203.72	8.4648		OLG - 17	111.527	0.477449	910.433	4.43938	409.707	3.10286	7090000000	72984749	15.729	0.567118	229.06	9.4035
OLG - 18	114.752	0.541695	938.017	4.83823	422.957	3.66308	13400000000	137000000	22.7066	0.818698	218.08	9.0927		OLG - 18	111.898	0.48424	899.558	3.60846	414.154	3.427	6790000000	72128244	15.7962	0.56954	219.96	9.012
OLG - 19	116.247	0.571358	956.07	4.45705	429.358	3.71477	13100000000	134000000	24.6672	0.889389	193.19	8.0561		OLG - 19	110.344	0.498041	897.353	3.95161	410.366	3.29616	7100000000	74353223	16.3409	0.589181	223.8	9.1708
OLG - 20	112.809	0.481498	918.707	4.09398	416.085	3.73765	12300000000	126000000	0.748719	0.0269954	4890.6	89.816		OLG - 20	113.89	0.509346	928.821	4.06673	418.51	3.63737	7380000000	76054743	16.1385	0.581883	227.71	9.2857
MK1_MRC_OLG-1	224.907	1.03645	158.649	0.751023	6.49769	0.225415	775000000	9381474	21.6319	0.779951	17.18	0.73127		MK1_MRCOLG-1	219.075	2.06909	152.351	1.5173	6.71551	0.576829	4.21098e+08	7.43389e+06	14.8703	0.536157	18.653	0.83092
MK1_MRC_OLG-2	222.506	0.997271	163.369	0.962895	6.71108	0.324286	775000000	9141801	0.696749	0.0251216	511.76	23.67		MK1_MRCOLG-2	214.364	2.80511	126.868	1.67748	6.18481	0.546912	4.45368e+08	6.2344e+06	15.6337	0.56368	19.581	0.85369
MK1_MRC_OLG-3	214.722	1.32587	155.721	1.00977	6.79775	0.38957	792000000	9900582	1.64418	0.0592817	237.16	10.069		MK1_MRCOLG-3	222.001	1.90268	158.061	1.42376	7.01758	0.522944	4.34088e+08	5977439	15.406	0.55547	18.25	0.78554
MK1_MRC_OLG-4	215.886	1.10845	152.903	0.879547	6.76341	0.394306	751000000	9156947	22.3078	0.804318	16.806	0.71371		MK1_MRCOLG-4	222.833	1.84729	156.416	1.48346	6.97863	0.449592	4.22254e+08	5.98713e+06	17.26	0.622318	15.82	0.67712
MK1_MRC_OLG-5	216.041	1.24557	155.333	0.998286	7.08681	0.351119	789000000	9388006	19.2117	0.692688	20.44	0.86839		MK1_MRCOLG-5	222.258	1.80411	157.573	1.21537	7.40606	0.50621	4.16289e+08	6.0171e+06	15.6541	0.564417	17.217	0.7358
MK1_MRC_OLG-6	230.682	1.15096	167.078	0.826322	7.08209	0.245596	843000000	10811972	21.436	0.772885	18.309	0.78133		MK1_MRCOLG-6	220.833	1.80923	156.486	1.4984	7.18382	0.417844	4.00689e+08	6.48594e+06	15.3372	0.552989	17.043	0.74008
MK1_MRC_OLG-7	225.425	1.02953	164.816	0.802355	6.98129	0.242619	818000000	10336610	20.7006	0.746371	18.804	0.80556		MK1_MRCOLG-7	217.386	3.16195	153.65	2.53415	7.02824	0.582416	4.2818e+08	7.00931e+06	16.5697	0.597429	17.113	0.77041
