# Supplementary material for: A novel in situ methodology for U–Pb, (U–Th)/He, and fission track triple dating
Source: Royal Society of Chemistry journal article supplement (doi:10.1039/d4ja00257a), 2024-01-01
Supplement: d4ja00257a7.xlsx [file d4ja00257a7.xlsx]

## Sheet: JAAS
	Durango	1SE	BZ2	1SE	MRC	1SE	OLG	1SE	MK-1	1SE
U-Pb NM	30.86	0.27	480	5	149.1	0.55	947.2	2.6	22.53	0.095
U-Pb DM	31.65	0.395	552	8.5	148.6	0.8	929.9	3.15	21.81	0.155
U-Pb IDM	29.86	0.385	503	7	146.3	0.8	906	3.05	21.23	0.145
FT DM	30.3	1.9	277	11	50.3	2.4	114.1	3.1
FT IDM	30.3	2.2	252	12	44.8	2.4	120.7	2.4
He CM	31.15	0.23	157	2	19.33	0.27	212.8	1.9	17.5	0.4
He DM	28.69	0.27	167.1	1.8	19.65	0.23	196.9	2.2	18.36	0.26
He IDM	31.44	0.35	177.4	1.8	14.84	0.21	222.8	2.1	18.43	0.21
