# Supplementary figures and images for: A novel in situ methodology for U–Pb, (U–Th)/He, and fission track triple dating
Source: Royal Society of Chemistry journal article supplement (doi:10.1039/d4ja00257a), 2024-01-01

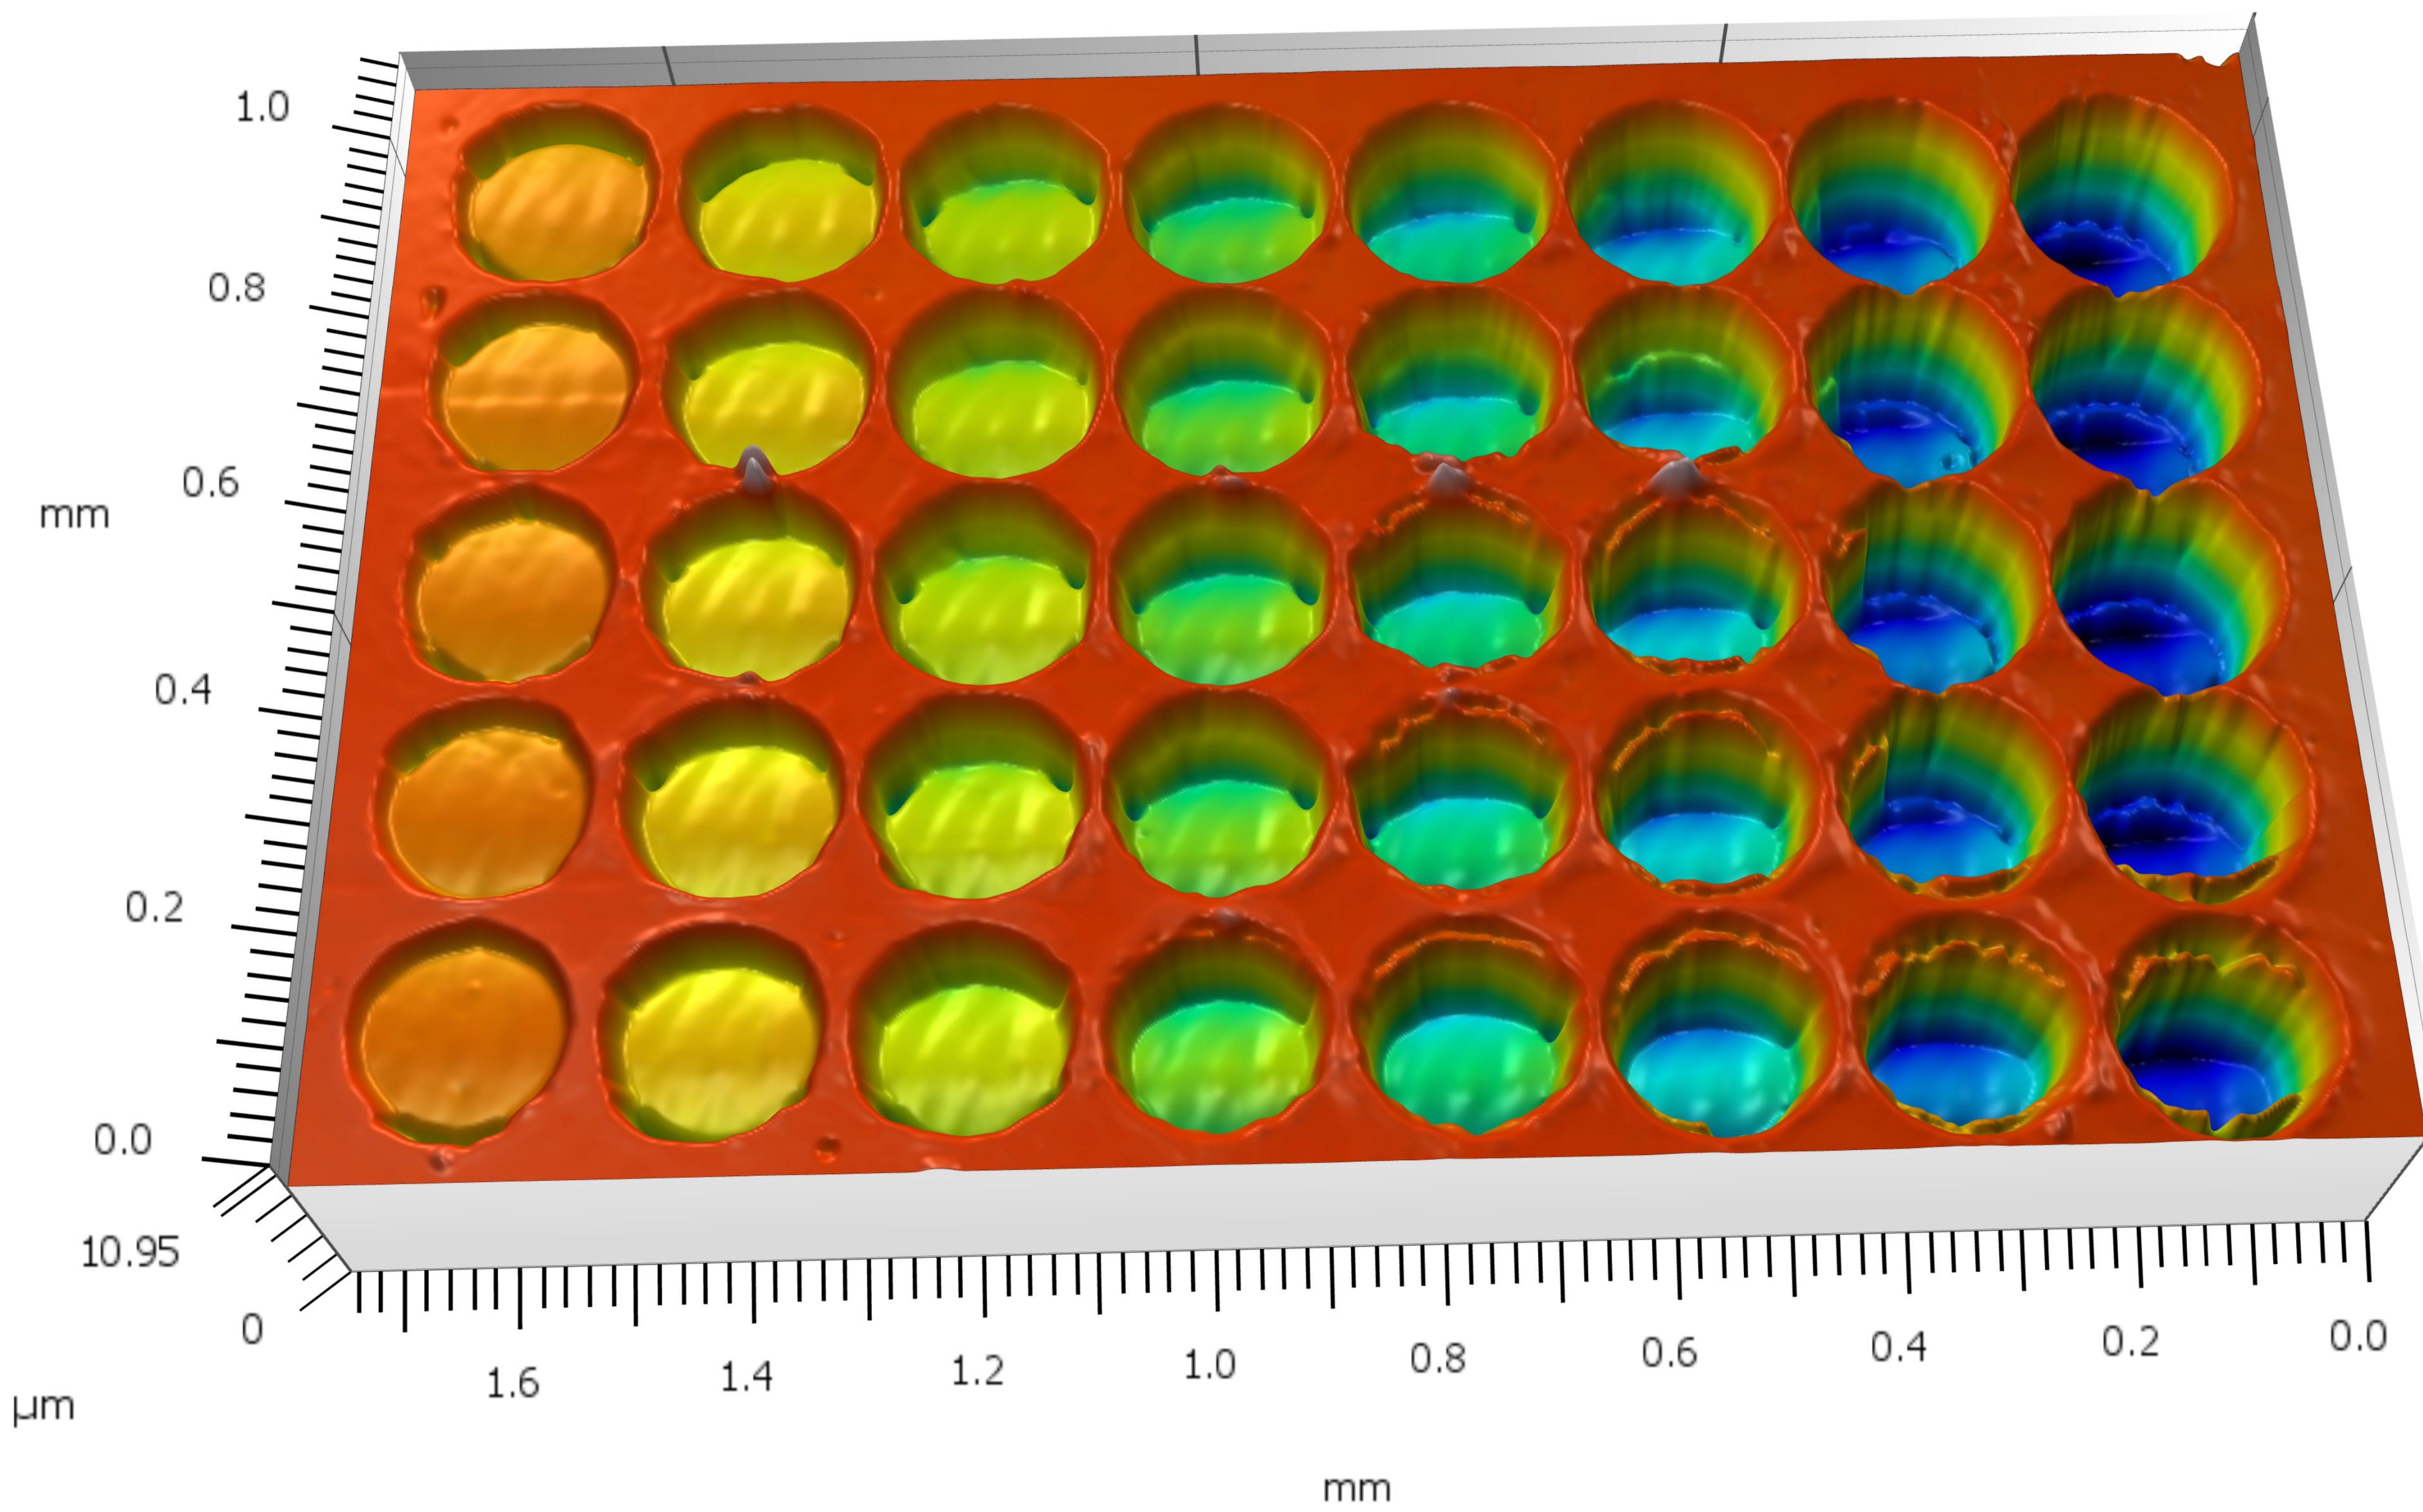

Supplement: d4ja00257a3.pdf [file d4ja00257a3.pdf]
